# Supplementary material for: N–S bond cleavage of tosyl hydrazones by dual reactive arynes: synthesis of diaryl sulfones, spiro[indazole-3,3′-indolin]-2′-one, and N-phenyl sulfonohydrazides
Source: Royal Society of Chemistry journal article supplement (doi:10.1039/d3nj00050h), 2023-01-01
Supplement: d3nj00050h1.pdf [file d3nj00050h1.pdf]

## Supporting Information

---

### **N-S Bond Cleavage of Tosyl Hydrazones by Dual Reactive Arynes: Synthesis of Diaryl Sulfones, Spiro[indazole-3,3'-indolin]-2'-one, and N-Phenyl benzenesulfonohydrazides**

**Suresh Snoxma Smile and Ponnusamy Shanmugam\***

*Organic and Bioorganic Chemistry Division, Central Leather Research Institute, Adyar, Chennai-600020, India*

| <b>Entry</b> | <b>Contents</b>                                                                                                                 | <b>Page No.</b> |
|--------------|---------------------------------------------------------------------------------------------------------------------------------|-----------------|
| 1            | General Remarks                                                                                                                 | S-1             |
| 2            | Experimental Procedures<br>Typical experimental procedure for the preparation of compounds <b>3</b> , <b>4</b> , and <b>5</b> . | S2              |
| 3            | Spectroscopic data of synthesized new compounds                                                                                 | S3-S10          |
| 4            | Copies of NMR and HRMS spectra                                                                                                  | S11-S51         |
| 5            | Crystal data of compound <b>3a</b>                                                                                              | S52-S56         |
| 6            | Crystal data of compound <b>4b</b>                                                                                              | S57-S62         |
| 7            | Crystal data of compound <b>4f</b>                                                                                              | S63-S68         |
| 8            | Crystal data of compound <b>5a</b>                                                                                              | S69-S78         |

#### **1. General remarks**

All the reactions were carried out in oven-dried glassware. Unless otherwise specified, all reactions were carried out under an atmosphere of argon. Commercial dry CH<sub>3</sub>CN was stored under nitrogen over 4 Å molecular sieves. The symmetrical and unsymmetrical and hetaryne precursors were purchased from Sigma-Aldrich and used as received, without any further purification. Anhydrous CsF was dried and stored under a nitrogen atmosphere. Progress of reactions was monitored by Thin Layer Chromatography (TLC) using Merck pre-coated TLC plates (Merck 60 F254) and compounds were visualized with a UV light at 254 nm. Further visualization was achieved by staining with iodine. Purification of crude compounds were done by column chromatography using Silica gel (Mesh size 100-200). The NMR spectra were recorded on a Bruker-400 MHz NMR spectrometer (400 MHz for <sup>1</sup>H NMR and 100 MHz for <sup>13</sup>C NMR) with CDCl<sub>3</sub> or DMSO-d<sub>6</sub> as the solvent and TMS as an internal reference. Integrals are in

accordance with assignments; Coupling constants ( $J$ ) were reported in Hertz (Hz). All the reported  $^{13}\text{C}$  spectra are proton-decoupled. Multiplicity is indicated as follows: s (singlet), d (doublet), t (triplet), q (quartet), m (multiplets), dd (doublet of doublet), brs (broad singlet). The FTIR spectra were recorded on a Perkin-Elmer RX-IFT-IR by KBr Pellet technique and absorbencies are reported in  $\text{cm}^{-1}$ . The HRMS analyses were done on a Q-T Micro mass spectrometer. Yields refer to quantities obtained after chromatography.

## 2. Experimental Details

### General experimental procedure for the preparation of compounds 3, 4, and 5

In a reaction tube charged with 4-methyl-N-methyl isatin-benzenesulfonylhydrazide 1 (50 mg, 1.8 mmol), dry acetonitrile (2 mL) under Ar atmosphere was added benzyne precursor 2-(trimethylsilyl) phenyl trifluoromethanesulfonate (3 equivalents, 0.100 mL) followed by 3 equivalents of CsF as fluoride source. The entire setup was kept in a preheated oil bath at  $60^\circ\text{C}$ . The progress of the reaction was monitored by TLC. After completion of the reaction (ca. 10 min.), the solvent was removed in vacuo. The resulting crude mixture was purified through a silica gel column chromatography using a gradient elution using hexane-EtOAc (up to 20%) to obtain pure compounds 3, 4, and 5 in excellent combined yield.

## 3. Spectroscopic data of synthesized compounds

| <i>1-Methyl-4-(phenylsulfonyl)benzene(3a)</i>                                                        |                                                                                                                                                                                                                                                                                                                                                                                                                                                                                                                                                                                                                                                                                                                                                                                                                                                     |
|------------------------------------------------------------------------------------------------------|-----------------------------------------------------------------------------------------------------------------------------------------------------------------------------------------------------------------------------------------------------------------------------------------------------------------------------------------------------------------------------------------------------------------------------------------------------------------------------------------------------------------------------------------------------------------------------------------------------------------------------------------------------------------------------------------------------------------------------------------------------------------------------------------------------------------------------------------------------|
| 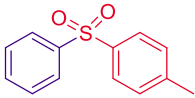 <p><b>3a</b></p> | <p><b>Nature:</b> White powder; 19mg, yield:51%;</p> <p><b>R<sub>f</sub></b> (25% EtOAc-Hexane):0.40</p> <p><b>FTIR</b> (KBr) <math>\nu_{\text{max}}</math>: 3090, 3059, 2980, 2869, 1657, 1593, 1448, 1401,1307, 1297, 1156, 1107, 998 <math>\text{cm}^{-1}</math>;</p> <p><b><math>^1\text{H}</math> NMR</b> (<math>\text{CDCl}_3/\text{TMS}</math>, 400 MHz,):<math>\delta</math> 7.95 – 7.91 (m, 2H), 7.86 – 7.80 (m, 2H), 7.56 – 7.46 (m, 3H), 7.32 –7.27 (m, 2H), 2.39 (s, 3H)</p> <p><b><math>^{13}\text{C}</math> NMR</b> (<math>\text{CDCl}_3/\text{TMS}</math>, 100 MHz): <math>\delta</math> 144.2, 142.0, 138.7, 133.0, 129.9, 129.2(2C), 127.7(2C), 127.5(2C), 21.6;</p> <p><b>HRMS-ESI:</b> Calcd. for <math>\text{C}_{13}\text{H}_{13}\text{O}_2\text{S}[\text{M}+\text{H}]^+</math> <math>m/z</math>: 233.0636; Found 233.0641.</p> |
| <i>1-Bromo-3-tosylbenzene(3b)</i>                                                                    |                                                                                                                                                                                                                                                                                                                                                                                                                                                                                                                                                                                                                                                                                                                                                                                                                                                     |

## Supporting Information

|                                                                                                                                  |                                                                                                                                                                                                                                                                                                                                                                                                                                                                                                                                                                                                                                                                                                                                                                                                                                                                                                                                     |
|----------------------------------------------------------------------------------------------------------------------------------|-------------------------------------------------------------------------------------------------------------------------------------------------------------------------------------------------------------------------------------------------------------------------------------------------------------------------------------------------------------------------------------------------------------------------------------------------------------------------------------------------------------------------------------------------------------------------------------------------------------------------------------------------------------------------------------------------------------------------------------------------------------------------------------------------------------------------------------------------------------------------------------------------------------------------------------|
| 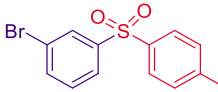 <p style="text-align: center;"><b>3b</b></p>   | <p><b>Nature:</b> Colourless liquid; 26mg, yield: 46%;</p> <p><b>R<sub>f</sub></b> (25% EtOAc-Hexane): 0.40;</p> <p><b>FTIR</b> (KBr) <math>\nu_{\max}</math>: 3079, 3039, 2981, 2927, 1929, 1894, 1702, 1662, 1592, 1492, 1321, 1293, 1119, 1016, 958, 914 <math>\text{cm}^{-1}</math>;</p> <p><b><sup>1</sup>H NMR</b> (<math>\text{CDCl}_3/\text{TMS}</math>, 400 MHz): <math>\delta</math> 8.06 (t, <math>J = 1.8</math> Hz, 1H), 7.88 – 7.80 (m, 3H), 7.68 – 7.64 (m, 1H), 7.39 – 7.29 (m, 3H), 2.41 (s, 3H);</p> <p><b><sup>13</sup>C NMR</b> (<math>\text{CDCl}_3/\text{TMS}</math>, 100 MHz): <math>\delta</math> 144.7, 143.9, 1379, 136.1, 130.8, 130.4(2C), 130.1, 127.9(2C), 126.1, 123.2, 21.6;</p> <p><b>HRMS-ESI:</b> Calcd. for <math>\text{C}_{13}\text{H}_{12}\text{BrO}_2\text{S}</math> <math>[\text{M}+\text{H}]^+m/z</math>: 312.9771; Found 312.9741.</p>                                                    |
| <p><i>4-Methyl-1-tosylbenzene (3c)</i></p>                                                                                       |                                                                                                                                                                                                                                                                                                                                                                                                                                                                                                                                                                                                                                                                                                                                                                                                                                                                                                                                     |
|  <p style="text-align: center;"><b>3c</b></p> | <p><b>Nature:</b> White powder; 21mg, yield: 40%;</p> <p><b>R<sub>f</sub></b> (25% EtOAc-Hexane): 0.40;</p> <p><b>FTIR</b> (KBr) <math>\nu_{\max}</math>: 3300, 3043, 2954, 2924, 1596, 1493, 1451, 1379, 1320, 1152, 1103, 1073 <math>\text{cm}^{-1}</math>;</p> <p><b><sup>1</sup>H NMR</b> (<math>\text{CDCl}_3/\text{TMS}</math>, 400 MHz): <math>\delta</math> 7.85 – 7.79 (m, 3H), 7.73 (ddd, <math>J = 6.3, 1.7, 0.6</math> Hz, 1H), 7.36 (ddd, <math>J = 4.6, 2.9, 1.1</math> Hz, 1H), 7.30 – 7.25 (m, 3H), 2.38 (d, <math>J = 3.4</math> Hz, 6H);</p> <p><b><sup>13</sup>C NMR</b> (<math>\text{CDCl}_3/\text{TMS}</math>, 100 MHz): <math>\delta</math> 144.1, 143.9, 141.8, 139.5, 139.1, 138.8, 133.8, 129.9, 129.1, 127.8, 127.6, 124.7, 21.6, 21.5;</p> <p><b>HRMS-ESI:</b> Calcd. for <math>\text{C}_{14}\text{H}_{15}\text{O}_2\text{S}</math> <math>[\text{M}+\text{H}]^+m/z</math>: 247.0793; Found 247.0782.</p> |
| <p><i>3-Methoxy-1-tosylbenzene (3d)</i></p>                                                                                      |                                                                                                                                                                                                                                                                                                                                                                                                                                                                                                                                                                                                                                                                                                                                                                                                                                                                                                                                     |
|  <p style="text-align: center;"><b>3d</b></p> | <p><b>Nature:</b> White powder; 23mg, yield: 41%;</p> <p><b>R<sub>f</sub></b> (25% EtOAc-Hexane): 0.40;</p> <p><b>FTIR</b> (KBr) <math>\nu_{\max}</math>: 3450, 3044, 2975, 2923, 2108, 1919, 1682, 1596, 1495, 1456, 1319, 1298, 1182, 1107, 1021 <math>\text{cm}^{-1}</math>;</p> <p><b><sup>1</sup>H NMR</b> (<math>\text{CDCl}_3/\text{TMS}</math>, 400 MHz): <math>\delta</math> 7.88 – 7.83 (m, 2H), 7.82 – 7.77 (m, 2H), 7.27 (d, <math>J = 7.9</math> Hz, 2H), 6.97 – 6.92 (m, 2H), 3.83 (s, 3H), 2.38 (s, 3H);</p> <p><b><sup>13</sup>C NMR</b> (<math>\text{CDCl}_3/\text{TMS}</math>, 100 MHz): <math>\delta</math> 163.2, 143.7, 139.5, 133.6, 129.8(2C), 129.7(2C), 127.4(2C), 114.5(2C), 55.6, 21.5;</p> <p><b>HRMS-ESI:</b> Calcd. for <math>\text{C}_{14}\text{H}_{15}\text{O}_3\text{S}</math> <math>[\text{M}+\text{H}]^+m/z</math>: 263.0742; Found 263.0732.</p>                                                |

| <i>4-Methoxy-1-tosylbenzene (3e)</i>                                                             |                                                                                                                                                                                                                                                                                                                                                                                                                                                                                                                                                                                                                                                                                                                                                                                                                                                                                                                                                                                       |
|--------------------------------------------------------------------------------------------------|---------------------------------------------------------------------------------------------------------------------------------------------------------------------------------------------------------------------------------------------------------------------------------------------------------------------------------------------------------------------------------------------------------------------------------------------------------------------------------------------------------------------------------------------------------------------------------------------------------------------------------------------------------------------------------------------------------------------------------------------------------------------------------------------------------------------------------------------------------------------------------------------------------------------------------------------------------------------------------------|
| 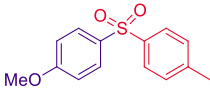<br><b>3e</b>   | <p><b>Nature:</b> White powder: 25mg, yield:45%;</p> <p><b>R<sub>f</sub></b> (25% EtOAc-Hexane):0.40;</p> <p><b>FTIR</b> (KBr) <math>\nu_{\max}</math>: 3450, 3096, 2575, 2108, 2095, 1919, 1682, 1596, 1495, 1319, 1182, 1107, 1071, 1021 <math>\text{cm}^{-1}</math>;</p> <p><b><sup>1</sup>H NMR</b> (<math>\text{CDCl}_3/\text{TMS}</math>, 400 MHz):<math>\delta</math>7.88 – 7.83 (m, 2H), 7.82 – 7.77 (m, 2H), 7.27 (d, <math>J = 7.9</math> Hz, 2H), 6.97 – 6.92 (m, 2H), 3.83 (s, 3H), 2.38 (s, 3H);</p> <p><b><sup>13</sup>C NMR</b> (<math>\text{CDCl}_3/\text{TMS}</math>, 100 MHz):<math>\delta</math>163.2, 143.7, 139.5, 133.6, 129.8(2C), 129.7(2C), 127.4(2C), 114.5(2C), 55.6, 21.5;</p> <p><b>HRMS-ESI:</b> Calcd. for <math>\text{C}_{14}\text{H}_{15}\text{O}_3\text{S}[\text{M}+\text{H}]^+</math> <math>m/z</math>: 263.0742; Found 263.0732.</p>                                                                                                              |
| <i>4,5-Dimethoxy-1-tosylbenzene (3f)</i>                                                         |                                                                                                                                                                                                                                                                                                                                                                                                                                                                                                                                                                                                                                                                                                                                                                                                                                                                                                                                                                                       |
| <br><b>3f</b> | <p><b>Nature: White solid:</b> 22mg, yield:35%;</p> <p><b>R<sub>f</sub></b> (25% EtOAc-Hexane):0.40;</p> <p><b>FTIR</b> (KBr) <math>\nu_{\max}</math>: 3445, 3084, 3053, 2848, 1592, 1508, 1470, 1456, 1313, 1297, 1185, 1103, 1079, 1021 <math>\text{cm}^{-1}</math>;</p> <p><b><sup>1</sup>H NMR</b> (<math>\text{CDCl}_3/\text{TMS}</math>, 400 MHz):<math>\delta</math>7.83 – 7.79 (m, 2H), 7.55 (dd, <math>J = 8.5</math>, 2.2 Hz, 1H), 7.38 (d, <math>J = 2.1</math> Hz, 1H), 7.30 – 7.26 (m, 2H), 6.92 (d, <math>J = 8.5</math> Hz, 1H), 3.91 (d, <math>J = 2.8</math> Hz, 6H), 2.39 (s, 3H);</p> <p><b><sup>13</sup>C NMR</b> (<math>\text{CDCl}_3/\text{TMS}</math>, 100 MHz): <math>\delta</math> 152.9, 149.2, 143.8, 139.3, 133.5, 129.9(2C), 127.3(2C), 121.7(2C), 110.8, 109.8, 56.2, 56.1, 21.5;</p> <p><b>HRMS-ESI:</b> Calcd. for <math>\text{C}_{15}\text{H}_{16}\text{O}_4\text{SNa} [\text{M}+\text{Na}]^+</math> <math>m/z</math>: 315.0667; Found 315.0656.</p> |
| <i>2-Tosyl-naphthalene (3g)</i>                                                                  |                                                                                                                                                                                                                                                                                                                                                                                                                                                                                                                                                                                                                                                                                                                                                                                                                                                                                                                                                                                       |
| <br><b>3g</b> | <p><b>Nature:</b> White powder: 29mg, yield:48%;</p> <p><b>R<sub>f</sub></b> (25% EtOAc-Hexane):0.40;</p> <p><b>FTIR</b> (KBr) <math>\nu_{\max}</math>: 3064, 2958, 2852, 1595, 1506, 1495, 1457, 1347, 1317, 1305, 1155, 1093 <math>\text{cm}^{-1}</math>;</p> <p><b><sup>1</sup>H NMR</b> (<math>\text{CDCl}_3/\text{TMS}</math>, 400 MHz):<math>\delta</math>8.59 – 8.53 (m, 1H), 7.99 – 7.94 (m, 1H), 7.94 – 7.88 (m, 2H), 7.88 – 7.82 (m, 3H), 7.66 – 7.56 (m, 2H), 7.29 (dd, <math>J = 8.5</math>, 0.6 Hz, 2H), 2.38 (s, 3H);</p> <p><b><sup>13</sup>C NMR</b> (<math>\text{CDCl}_3/\text{TMS}</math>, 100 MHz): <math>\delta</math> 144.2, 138.8, 138.7, 134.9, 132.3,</p>                                                                                                                                                                                                                                                                                                     |

## Supporting Information

|                                                                                                      |                                                                                                                                                                                                                                                                                                                                                                                                                                                                                                                                                                                                                                                                                                                                                                                                                                                                                                         |
|------------------------------------------------------------------------------------------------------|---------------------------------------------------------------------------------------------------------------------------------------------------------------------------------------------------------------------------------------------------------------------------------------------------------------------------------------------------------------------------------------------------------------------------------------------------------------------------------------------------------------------------------------------------------------------------------------------------------------------------------------------------------------------------------------------------------------------------------------------------------------------------------------------------------------------------------------------------------------------------------------------------------|
|                                                                                                      | <p>129.9(2C), 129.5, 129.4, 129.1(2C), 128.9, 127.9, 127.8, 127.6, 122.6, 21.6 ;</p> <p><b>HRMS-ESI:</b> Calcd. for C<sub>17</sub>H<sub>14</sub>O<sub>2</sub>SNa [M+Na]<sup>+</sup>m/z: 305.0612; Found 305.0603.</p>                                                                                                                                                                                                                                                                                                                                                                                                                                                                                                                                                                                                                                                                                   |
| <b>6-Tosyl-1H-indole (3h)</b>                                                                        |                                                                                                                                                                                                                                                                                                                                                                                                                                                                                                                                                                                                                                                                                                                                                                                                                                                                                                         |
| 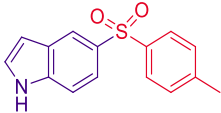 <p><b>3h</b></p>   | <p><b>Nature:</b> Yellow powder: 25mg, yield:43%;</p> <p><b>R<sub>f</sub></b> (25% EtOAc-Hexane):0.40;</p> <p><b>FTIR</b> (KBr) ν<sub>max</sub>: 3316, 2958, 2921, 1597, 1496, 1349, 1327, 1279, 1146, 1053, 1019, 972, 917cm<sup>-1</sup>;</p> <p><b><sup>1</sup>H NMR</b> (CDCl<sub>3</sub>/TMS, 400 MHz):δ 8.71 (s, 1H), 8.22 (d, <i>J</i> = 1.6 Hz, 1H), 7.80 (dd, <i>J</i> = 7.5, 4.5 Hz, 1H), 7.76 (t, <i>J</i> = 6.1 Hz, 2H), 7.60 (dd, <i>J</i> = 8.6, 1.8 Hz, 1H), 7.34 (d, <i>J</i> = 8.6 Hz, 1H), 7.26 – 7.21 (m, 1H), 7.19 – 7.13 (m, 3H), 6.57 – 6.53 (m, 1H), 2.28 (s, 3H);</p> <p><b><sup>13</sup>C NMR</b> (CDCl<sub>3</sub>/TMS, 100 MHz): δ 143.4, 139.9, 137.9, 132.7, 129.6, 127.5, 127.3, 126.8, 121.7, 121.2, 120.8, 118.9, 104.0, 102.1, 21.5;</p> <p><b>HRMS-ESI:</b> Calcd. for C<sub>15</sub>H<sub>14</sub>NO<sub>2</sub>S[M+H]<sup>+</sup>m/z: 272.0745; Found 272.0733.</p> |
| <b>1'-Methylspiro[indazole-3,3'-indolin]-2'-one (4a)</b>                                             |                                                                                                                                                                                                                                                                                                                                                                                                                                                                                                                                                                                                                                                                                                                                                                                                                                                                                                         |
|  <p><b>4a</b></p> | <p><b>Nature:</b> White Solid: 12mg, yield:32%;</p> <p><b>R<sub>f</sub></b> (25% EtOAc-Hexane):0.40;</p> <p><b>FTIR</b> (KBr) ν<sub>max</sub>: 3087, 3071, 2941, 2889, 1723, 1610, 1493, 1424, 1366, 1303, 1252, 1125, 1085, 1062, 996, 930cm<sup>-1</sup>;</p> <p><b><sup>1</sup>H NMR</b> (CDCl<sub>3</sub>/TMS, 400 MHz):δ8.23 (d, <i>J</i> = 7.9 Hz, 1H), 7.61 (td, <i>J</i> = 7.8, 1.0 Hz, 1H), 7.47 (dtd, <i>J</i> = 21.7, 7.6, 1.0 Hz, 2H), 7.34 (d, <i>J</i> = 7.5 Hz, 1H), 7.02 (ddd, <i>J</i> = 11.5, 8.4, 4.4 Hz, 2H), 6.58 – 6.49 (m, 1H), 3.37 (s, 3H);</p> <p><b><sup>13</sup>C NMR</b> (CDCl<sub>3</sub>/TMS, 100 MHz): δ 167.1, 160.2, 145.9, 137.9, 130.9, 130.8, 130.1, 124.2, 123.5, 122.6, 122.0, 121.6, 109.2, 99.5, 27.4;</p> <p><b>HRMS-ESI:</b> Calcd. for C<sub>15</sub>H<sub>12</sub>N<sub>3</sub>O[M+H]<sup>+</sup>m/z: 250.0980; Found 250.0991.</p>                        |
| <b>4-Bromo-1'-methylspiro[indazole-3,3'-indolin]-2'-one (4b)</b>                                     |                                                                                                                                                                                                                                                                                                                                                                                                                                                                                                                                                                                                                                                                                                                                                                                                                                                                                                         |
|                                                                                                      | <p><b>Nature:</b> White Solid:16mg, yield:27%;</p> <p><b>R<sub>f</sub></b> (25% EtOAc-Hexane):0.40;</p> <p><b>FTIR</b> (KBr) ν<sub>max</sub>: 3451, 2922, 1722, 1611, 1583, 1492, 1449, 1363, 1344, 1255, 1126, 1019, 950 cm<sup>-1</sup>;</p>                                                                                                                                                                                                                                                                                                                                                                                                                                                                                                                                                                                                                                                          |

## Supporting Information

|                                                                                                                                  |                                                                                                                                                                                                                                                                                                                                                                                                                                                                                                                                                                                                                                                                                                                                                                                                                                                                                                                                                                                                                                                                        |
|----------------------------------------------------------------------------------------------------------------------------------|------------------------------------------------------------------------------------------------------------------------------------------------------------------------------------------------------------------------------------------------------------------------------------------------------------------------------------------------------------------------------------------------------------------------------------------------------------------------------------------------------------------------------------------------------------------------------------------------------------------------------------------------------------------------------------------------------------------------------------------------------------------------------------------------------------------------------------------------------------------------------------------------------------------------------------------------------------------------------------------------------------------------------------------------------------------------|
| 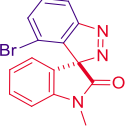 <p style="text-align: center;"><b>4b</b></p>   | <p><b><sup>1</sup>H NMR</b> (CDCl<sub>3</sub>/TMS, 400 MHz): δ 8.18 (dd, <i>J</i> = 7.8, 0.6 Hz, 1H), 7.60 (dd, <i>J</i> = 7.9, 0.6 Hz, 1H), 7.53 – 7.44 (m, 2H), 7.08 – 6.99 (m, 2H), 6.57 (dd, <i>J</i> = 7.4, 0.6 Hz, 1H), 3.42 (s, 3H);</p> <p><b><sup>13</sup>C NMR</b> (CDCl<sub>3</sub>/TMS, 100 MHz): δ 165.2, 160.2, 146.3, 138.5, 133.9, 131.9, 131.0, 124.1, 123.5, 120.9, 118.8, 117.5, 109.3, 101.1, 27.5;</p> <p><b>HRMS-ESI:</b> Calcd. for C<sub>15</sub>H<sub>11</sub>BrN<sub>3</sub>O[M+H]<sup>+</sup><i>m/z</i>: 250.0980; Found 250.0991.</p>                                                                                                                                                                                                                                                                                                                                                                                                                                                                                                      |
| <p><i>4-Methoxy-1'-methylspiro[indazole-3,3'-indolin]-2'-one (4c)</i></p>                                                        |                                                                                                                                                                                                                                                                                                                                                                                                                                                                                                                                                                                                                                                                                                                                                                                                                                                                                                                                                                                                                                                                        |
|  <p style="text-align: center;"><b>4c</b></p>   | <p><b>Nature:</b> White Solid: 16mg, yield:27%;</p> <p><b>R<sub>f</sub></b> (25% EtOAc-Hexane):0.40;</p> <p><b>FTIR</b> (KBr) <i>v</i><sub>max</sub>: 3093, 3064, 3013, 2946, 1721, 1613, 1491, 1329, 1292, 1173, 1127, 1025, 992, 936 cm<sup>-1</sup>;</p> <p><b><sup>1</sup>H NMR</b> (CDCl<sub>3</sub>/TMS, 400 MHz): δ 7.73 (d, <i>J</i> = 2.2 Hz, 1H), 7.44 (td, <i>J</i> = 7.8, 1.2 Hz, 1H), 7.21 (d, <i>J</i> = 8.2 Hz, 1H), 7.07 – 6.99 (m, 3H), 6.60 – 6.55 (m, 1H), 3.94 (s, 3H), 3.37 (s, 3H);</p> <p><b><sup>13</sup>C NMR</b> (CDCl<sub>3</sub>/TMS, 100 MHz): δ 167.4, 161.9, 161.6, 145.9, 130.7, 129.7, 124.3, 123.4, 122.9, 121.8, 118.3, 109.1(2C), 106.1, 55.9, 27.4;</p> <p><b>HRMS-ESI:</b> Calcd. for C<sub>16</sub>H<sub>14</sub>N<sub>3</sub>O<sub>2</sub>[M+H]<sup>+</sup><i>m/z</i>: 280.1086; Found 280.1080.</p>                                                                                                                                                                                                                           |
| <p><i>1'-Allylspiro[indazole-3,3'-indolin]-2'-one (4d)</i></p>                                                                   |                                                                                                                                                                                                                                                                                                                                                                                                                                                                                                                                                                                                                                                                                                                                                                                                                                                                                                                                                                                                                                                                        |
|  <p style="text-align: center;"><b>4d</b></p> | <p><b>Nature:</b> White Solid: 14mg, yield:26%;</p> <p><b>R<sub>f</sub></b> (25% EtOAc-Hexane):0.40;</p> <p><b>FTIR</b> (KBr) <i>v</i><sub>max</sub>: 3084, 3065, 3036, 2979, 1594, 1494, 1448, 1308, 1295, 1156, 1071, 1018, 998 cm<sup>-1</sup>;</p> <p><b><sup>1</sup>H NMR</b> (CDCl<sub>3</sub>/TMS, 400 MHz): δ 8.17 (d, <i>J</i> = 7.9 Hz, 1H), 7.55 (td, <i>J</i> = 7.8, 1.0 Hz, 1H), 7.43 (td, <i>J</i> = 7.5, 0.9 Hz, 1H), 7.33 (td, <i>J</i> = 7.8, 1.2 Hz, 1H), 7.27 (d, <i>J</i> = 7.4 Hz, 1H), 6.94 (ddd, <i>J</i> = 11.0, 8.4, 4.4 Hz, 2H), 6.49 (dd, <i>J</i> = 7.4, 0.6 Hz, 1H), 5.87 (ddt, <i>J</i> = 17.1, 10.4, 5.2 Hz, 1H), 5.29 (ddd, <i>J</i> = 13.7, 11.2, 0.8 Hz, 2H), 4.41 (ddd, <i>J</i> = 5.4, 4.0, 1.7 Hz, 2H);</p> <p><b><sup>13</sup>C NMR</b> (CDCl<sub>3</sub>/TMS, 100 MHz): δ 166.8, 160.2, 145.2, 138.1, 13.0, 130.7, 130.6, 130.0, 124.3, 123.5, 122.5, 122.1, 121.7, 118.2, 110.1, 99.4, 43.4;</p> <p><b>MS-ESI:</b> Calcd. for C<sub>17</sub>H<sub>14</sub>N<sub>3</sub>O[M+H]<sup>+</sup><i>m/z</i>: 276.11; Found 276.21.</p> |
| <p><i>Spiro[fluorene-9,3'-indazole] (4e)</i></p>                                                                                 |                                                                                                                                                                                                                                                                                                                                                                                                                                                                                                                                                                                                                                                                                                                                                                                                                                                                                                                                                                                                                                                                        |

## Supporting Information

|                                                                                                                                  |                                                                                                                                                                                                                                                                                                                                                                                                                                                                                                                                                                                                                                                                                                                                                                                                                                                                                                                                                                                                |
|----------------------------------------------------------------------------------------------------------------------------------|------------------------------------------------------------------------------------------------------------------------------------------------------------------------------------------------------------------------------------------------------------------------------------------------------------------------------------------------------------------------------------------------------------------------------------------------------------------------------------------------------------------------------------------------------------------------------------------------------------------------------------------------------------------------------------------------------------------------------------------------------------------------------------------------------------------------------------------------------------------------------------------------------------------------------------------------------------------------------------------------|
| 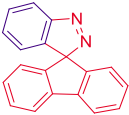 <p style="text-align: center;"><b>4e</b></p>   | <p><b>Nature:</b> White Solid: 20mg, yield: 37%;</p> <p><b>R<sub>f</sub></b> (25% EtOAc-Hexane):0.40;</p> <p><b>FTIR</b> (KBr) <math>\nu_{\text{max}}</math>: 3057, 3022, 2851, 1596, 1460,1285, 1263, 1175, 1152, 1087, 953, 932, 873<math>\text{cm}^{-1}</math>;</p> <p><b><sup>1</sup>H NMR</b> (CDCl<sub>3</sub>/TMS, 400 MHz.):<math>\delta</math> 8.17 (d, <math>J</math> = 7.9 Hz, 1H), 7.78 (d, <math>J</math> = 7.6 Hz, 2H), 7.50 (td, <math>J</math> = 7.9, 1.0 Hz, 1H), 7.35 (dtd, <math>J</math> = 8.3, 7.5, 0.9 Hz, 3H), 7.09 (td, <math>J</math> = 7.5, 1.0 Hz, 2H), 7.03 (d, <math>J</math> = 7.4 Hz, 1H), 6.48 (d, <math>J</math> = 7.6 Hz, 2H);</p> <p><b><sup>13</sup>C NMR</b> (CDCl<sub>3</sub>/TMS, 100 MHz): <math>\delta</math> 159.2, 143.4, 140.6, 138.1, 130.7, 129.6, 129.4, 128.2, 123.8, 122.6, 121.4, 120.7, 103.2;</p> <p><b>HRMS-ESI:</b> Calcd. for C<sub>19</sub>H<sub>13</sub>N<sub>2</sub>[M+H]<sup>+</sup><math>m/z</math>: 269.1079; Found 269.1074.</p> |
| <p><i>4'-Methoxyspiro[fluorene-9,3'-indazole]</i> (<b>4f</b>)</p>                                                                |                                                                                                                                                                                                                                                                                                                                                                                                                                                                                                                                                                                                                                                                                                                                                                                                                                                                                                                                                                                                |
|  <p style="text-align: center;"><b>4f</b></p> | <p><b>Nature:</b> White Solid: 23mg, yield:38%;</p> <p><b>R<sub>f</sub></b> (25% EtOAc-Hexane):0.40;</p> <p><b>FTIR</b> (KBr) <math>\nu_{\text{max}}</math>: 3050, 2925, 2853, 1606, 1495, 1467, 1276, 1213, 1077, 993, 946, 860, 844 <math>\text{cm}^{-1}</math>;</p> <p><b><sup>1</sup>H NMR</b> (CDCl<sub>3</sub>/TMS, 400 MHz.):<math>\delta</math>7.77 (d, <math>J</math> = 7.7 Hz, 3H), 7.48 (t, <math>J</math> = 8.0 Hz, 1H), 7.35 (td, <math>J</math> = 7.5, 1.0 Hz, 2H), 7.08 (td, <math>J</math> = 7.5, 1.0 Hz, 2H), 6.82 (d, <math>J</math> = 8.1 Hz, 1H), 6.51 (d, <math>J</math> = 7.6 Hz, 2H), 3.35 (s, 3H);</p> <p><b><sup>13</sup>C NMR</b> (CDCl<sub>3</sub>/TMS, 100 MHz): <math>\delta</math> 161.1, 155.4, 143.5, 136.9, 131.5, 129.3(2C), 127.8(2C), 126.9, 123.3(2C), 120.6, 113.6, 113.2, 102.7, 55.9;</p> <p><b>HRMS-ESI:</b> Calcd. for C<sub>20</sub>H<sub>15</sub>N<sub>2</sub>O[M+H]<sup>+</sup><math>m/z</math>: 299.1184; Found 299.1194.</p>                    |
| <p><i>3-Diazo-1-methylindolin-2-one</i>(<b>4g</b>)</p>                                                                           |                                                                                                                                                                                                                                                                                                                                                                                                                                                                                                                                                                                                                                                                                                                                                                                                                                                                                                                                                                                                |
|  <p style="text-align: center;"><b>4g</b></p> | <p><b>Nature:</b> Orange Crystal: 11mg, yield:29%;</p> <p><b>R<sub>f</sub></b> (25% EtOAc-Hexane):0.40;</p> <p><b>FTIR</b> (KBr) <math>\nu_{\text{max}}</math>: 2954, 2853, 2109, 2097, 1687, 1671, 1468, 1420, 1371, 1314, 1123, 1096, 1019 <math>\text{cm}^{-1}</math>;</p> <p><b><sup>1</sup>H NMR</b> (CDCl<sub>3</sub>/TMS, 400 MHz.):<math>\delta</math> 7.20 (ddt, <math>J</math> = 8.2, 3.0, 1.2 Hz, 2H), 7.12 – 7.07 (m, 1H), 6.94 – 6.90 (m, 1H), 3.33 (s, 3H);</p> <p><b><sup>13</sup>C NMR</b> (CDCl<sub>3</sub>/TMS, 100 MHz): <math>\delta</math> 166.9, 134.5, 125.5(2C), 122.1, 118.2, 116.7, 108.6, 26.8;</p>                                                                                                                                                                                                                                                                                                                                                                 |

## Supporting Information

|                                                                                                        |                                                                                                                                                                                                                                                                                                                                                                                                                                                                                                                                                                                                                                                                                                                                                                                                                                                                                                                                                                                                                                 |
|--------------------------------------------------------------------------------------------------------|---------------------------------------------------------------------------------------------------------------------------------------------------------------------------------------------------------------------------------------------------------------------------------------------------------------------------------------------------------------------------------------------------------------------------------------------------------------------------------------------------------------------------------------------------------------------------------------------------------------------------------------------------------------------------------------------------------------------------------------------------------------------------------------------------------------------------------------------------------------------------------------------------------------------------------------------------------------------------------------------------------------------------------|
|                                                                                                        | <b>HRMS-ESI:</b> Calcd. for C <sub>9</sub> H <sub>8</sub> N <sub>3</sub> O [M+H] <sup>+</sup> m/z: 174.0667; Found 174.0675.                                                                                                                                                                                                                                                                                                                                                                                                                                                                                                                                                                                                                                                                                                                                                                                                                                                                                                    |
| <b>(E)-4-Methyl-N'-(1-methyl-2-oxoindolin-3-ylidene)-N-phenylbenzenesulfonohydrazide (5a)</b>          |                                                                                                                                                                                                                                                                                                                                                                                                                                                                                                                                                                                                                                                                                                                                                                                                                                                                                                                                                                                                                                 |
| 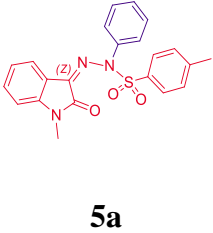 <p><b>5a</b></p>     | <p><b>Nature:</b> Yellow solid:9mg, yield:13%;</p> <p><b>R<sub>f</sub></b> (25% EtOAc-Hexane):0.40;</p> <p><b>FTIR</b> (KBr) ν<sub>max</sub>: 2923, 2852, 1734, 1606, 1486, 1372, 1358, 1186, 1170, 1088, 973, 888 cm<sup>-1</sup>;</p> <p><b><sup>1</sup>H NMR</b> (CDCl<sub>3</sub>/TMS, 400 MHz.):δ7.60 (d, <i>J</i> = 8.3 Hz, 2H), 7.30 (td, <i>J</i> = 7.8, 1.1 Hz, 1H), 7.25 – 7.22 (m, 5H), 7.17 (dd, <i>J</i> = 7.4, 2.5 Hz, 2H), 6.83 (t, <i>J</i> = 7.7 Hz, 1H), 6.73 (d, <i>J</i> = 7.9 Hz, 1H), 3.21 (s, 3H), 2.40 (s, 3H);</p> <p><b><sup>13</sup>C NMR</b> (CDCl<sub>3</sub>/TMS, 100 MHz): δ 144.8, 133.8, 129.9(2C), 129.1, 128.9(2C), 128.5(2C), 128.0(2C), 125.8(2C), 122.8, 108.8, 26.9, 21.7;</p> <p><b>HRMS-ESI:</b> Calcd. for C<sub>22</sub>H<sub>19</sub>N<sub>3</sub>O<sub>3</sub>SNa [M+Na]<sup>+</sup>m/z: 428.1045; Found 428.1043.</p>                                                                                                                                                             |
| <b>(E)-N-(2-Bromophenyl)-4-methyl-N'-(1-methyl-2-oxoindolin-3-ylidene)benzenesulfonohydrazide (5b)</b> |                                                                                                                                                                                                                                                                                                                                                                                                                                                                                                                                                                                                                                                                                                                                                                                                                                                                                                                                                                                                                                 |
|  <p><b>5b</b></p>   | <p><b>Nature:</b> Orange solid: 16mg, yield:18%;</p> <p><b>R<sub>f</sub></b> (25% EtOAc-Hexane):0.40;</p> <p><b>FTIR</b> (KBr) ν<sub>max</sub>: 3449, 3090, 3064, 2928, 1736, 1610, 1570, 1418, 1369, 1171, 1105, 1067, 966, 922, 884, 815cm<sup>-1</sup>;</p> <p><b><sup>1</sup>H NMR</b> (CDCl<sub>3</sub>/TMS, 400 MHz.):δ 7.60 (dd, <i>J</i> = 7.7, 0.7 Hz, 1H), 7.57 – 7.53 (m, 2H), 7.40 – 7.34 (m, 2H), 7.32 (t, <i>J</i> = 1.9 Hz, 1H), 7.27 – 7.25 (m, 2H), 7.22 (ddd, <i>J</i> = 8.2, 2.1, 1.1 Hz, 1H), 7.12 (t, <i>J</i> = 8.0 Hz, 1H), 6.95 (td, <i>J</i> = 7.7, 0.9 Hz, 1H), 6.78 (d, <i>J</i> = 7.8 Hz, 1H), 3.22 (s, 3H), 2.42 (s, 3H);</p> <p><b><sup>13</sup>C NMR</b> (CDCl<sub>3</sub>/TMS, 100 MHz): δ 162.9, 154.8, 147.1, 145.2, 143.0, 134.6, 130.9, 130.3, 129.9, 129.8(2C), 129.3(2C), 128.9, 128.2, 124.2, 123.1, 122.1, 115.1, 108.9, 26.2, 21.7;</p> <p><b>HRMS-ESI:</b> Calcd. for C<sub>22</sub>H<sub>18</sub>BrN<sub>3</sub>O<sub>3</sub>SNa [M+Na]<sup>+</sup>m/z: 506.0150;Found 506.0148.</p> |
| <b>(E)-4-Methyl-N'-(1-methyl-2-oxoindolin-3-ylidene)-N-(p-tolyl)benzenesulfonohydrazide (5c)</b>       |                                                                                                                                                                                                                                                                                                                                                                                                                                                                                                                                                                                                                                                                                                                                                                                                                                                                                                                                                                                                                                 |
|                                                                                                        | <p><b>Nature:</b> Yellow solid: 10mg, yield:11%;</p> <p><b>R<sub>f</sub></b> (25% EtOAc-Hexane):0.40;</p>                                                                                                                                                                                                                                                                                                                                                                                                                                                                                                                                                                                                                                                                                                                                                                                                                                                                                                                       |



## Supporting Information

|                                                                                                                                  |                                                                                                                                                                                                                                                                                                                                                                                                                                                                                                                                                                                                                                                                                                                                                                                                                                                                                                                                                                                                                                                                 |
|----------------------------------------------------------------------------------------------------------------------------------|-----------------------------------------------------------------------------------------------------------------------------------------------------------------------------------------------------------------------------------------------------------------------------------------------------------------------------------------------------------------------------------------------------------------------------------------------------------------------------------------------------------------------------------------------------------------------------------------------------------------------------------------------------------------------------------------------------------------------------------------------------------------------------------------------------------------------------------------------------------------------------------------------------------------------------------------------------------------------------------------------------------------------------------------------------------------|
| 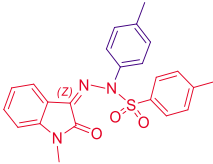 <p style="text-align: center;"><b>5c</b></p>   | <p><b>FTIR</b> (KBr) <math>\nu_{\max}</math>: 3059, 2920, 2851, 1719, 1635, 1490, 1345, 1270, 1123, 1017, 986, 932, 883, 816 <math>\text{cm}^{-1}</math>;</p> <p><b><math>^1\text{H}</math> NMR</b> (<math>\text{CDCl}_3/\text{TMS}</math>, 400 MHz): <math>\delta</math> 8.09 (d, <math>J = 8.1</math> Hz, 1H), 8.05 – 8.02 (m, 1H), 7.47 – 7.38 (m, 3H), 7.33 – 7.29 (m, 1H), 7.21 (d, <math>J = 7.6</math> Hz, 1H), 7.15 – 7.13 (m, 1H), 7.06 – 6.98 (m, 4H), 6.59 – 6.53 (m, 2H), 3.38 (d, <math>J = 1.3</math> Hz, 6H), 2.54 (s, 3H);</p> <p><b><math>^{13}\text{C}</math> NMR</b> (<math>\text{CDCl}_3/\text{TMS}</math>, 100 MHz): <math>\delta</math> 167.4, 160.9, 158.6, 145.9, 141.9, 140.6, 138.4, 135.1, 130.7(2C), 124.2, 124.1, 123.4, 123.2(2C), 122.3, 122.2, 121.6, 109.1(2C), 27.3, 21.6, 21.5;</p> <p><b>MS-ESI</b>: Calcd. for <math>\text{C}_{22}\text{H}_{22}\text{N}_3\text{O}_3\text{S}[\text{M}+\text{H}]^+m/z</math>: 420.13; Found 420.05.</p>                                                                                      |
| <p><i>(E)-N-(3,4-Dimethoxyphenyl)-4-methyl-N'-(1-methyl-2-oxoindolin-3-ylidene)benzenesulfonohydrazide (5d)</i></p>              |                                                                                                                                                                                                                                                                                                                                                                                                                                                                                                                                                                                                                                                                                                                                                                                                                                                                                                                                                                                                                                                                 |
|  <p style="text-align: center;"><b>5d</b></p> | <p><b>Nature</b>: Yellow solid: 12mg, yield:12%;</p> <p><b>R<sub>f</sub></b> (25% EtOAc-Hexane):0.40;</p> <p><b>FTIR</b> (KBr) <math>\nu_{\max}</math>: 2955, 2853, 1738, 1610, 1511, 1469, 1369, 1264, 1170, 1023, 941, 868, 815 <math>\text{cm}^{-1}</math>;</p> <p><b><math>^1\text{H}</math> NMR</b> (<math>\text{CDCl}_3/\text{TMS}</math>, 400 MHz.):<math>\delta</math>7.65 (d, <math>J = 8.3</math> Hz, 2H), 7.34 – 7.28 (m, 2H), 7.25 (s, 1H), 6.85 (t, <math>J = 7.8</math> Hz, 1H), 6.76 – 6.67 (m, 3H), 6.62 (d, <math>J = 2.3</math> Hz, 1H), 3.84 (s, 3H), 3.66 (s, 3H), 3.21 (s, 3H), 2.41 (s, 3H);</p> <p><b><math>^{13}\text{C}</math> NMR</b> (<math>\text{CDCl}_3/\text{TMS}</math>, 100 MHz): <math>\delta</math> 163.3, 148.8, 146.7, 144.7, 134.6, 133.7, 130.9(2C), 130.0(2C), 129.1, 128.6, 122.8, 118.8, 115.1, 110.3(2C), 109.6(2C), 108.6, 56.1, 55.9, 26.2, 21.6;</p> <p><b>HRMS-ESI</b>: Calcd. for <math>\text{C}_{24}\text{H}_{23}\text{N}_3\text{O}_5\text{SNa} [\text{M}+\text{Na}]^+m/z</math>: 488.1256; Found 488.1253.</p> |
| <p><i>(E)-N'-(1-Allyl-2-oxoindolin-3-ylidene)-4-methyl-N-phenylbenzenesulfonohydrazide (5e)</i></p>                              |                                                                                                                                                                                                                                                                                                                                                                                                                                                                                                                                                                                                                                                                                                                                                                                                                                                                                                                                                                                                                                                                 |
|                                                                                                                                  | <p><b>Nature</b>: Yellow Solid: 11mg, yield: 13%;</p> <p><b>R<sub>f</sub></b> (25% EtOAc-Hexane):0.40;</p> <p><b>FTIR</b> (KBr) <math>\nu_{\max}</math>: 2959, 2924, 2853, 1731, 1607, 1469, 1362, 1172, 1089, 1022, 884 <math>\text{cm}^{-1}</math>;</p> <p><b><math>^1\text{H}</math> NMR</b> (<math>\text{CDCl}_3/\text{TMS}</math>, 400 MHz.):<math>\delta</math> 7.55 – 7.52 (m, 2H), 7.19 – 7.15 (m, 6H), 7.13 – 7.09 (m, 2H), 6.74 (td, <math>J = 7.7, 1.0</math> Hz, 1H), 6.67 (d, <math>J = 7.7</math> Hz,</p>                                                                                                                                                                                                                                                                                                                                                                                                                                                                                                                                         |

## Supporting Information

|                                                                                                                                |                                                                                                                                                                                                                                                                                                                                                                                                                                                                                                                                                                                                                                                                                                                                                                                                                                                                                                                                                                                                                                                                                                               |
|--------------------------------------------------------------------------------------------------------------------------------|---------------------------------------------------------------------------------------------------------------------------------------------------------------------------------------------------------------------------------------------------------------------------------------------------------------------------------------------------------------------------------------------------------------------------------------------------------------------------------------------------------------------------------------------------------------------------------------------------------------------------------------------------------------------------------------------------------------------------------------------------------------------------------------------------------------------------------------------------------------------------------------------------------------------------------------------------------------------------------------------------------------------------------------------------------------------------------------------------------------|
| 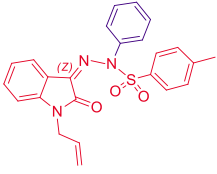 <p style="text-align: center;"><b>5e</b></p> | <p>1H), 5.79 – 5.68 (m, 1H), 5.22 – 5.14 (m, 2H), 4.27 (dt, <math>J = 5.4, 1.6</math> Hz, 2H), 2.34 (s, 3H);</p> <p><math>^{13}\text{C}</math> NMR (CDCl<sub>3</sub>/TMS, 100 MHz): <math>\delta</math> 146.1, 144.8, 141.8, 133.7, 130.9, 130.8(2C), 129.9(2C), 129.1(2C), 128.9(2C), 128.6(2C), 128.1, 125.8(2C), 122.7, 118.3, 115.1, 109.5, 42.5, 21.7;</p> <p><b>MS-ESI:</b> Calcd. for C<sub>24</sub>H<sub>22</sub>N<sub>3</sub>O<sub>3</sub>S[M+H]<sup>+</sup><math>m/z</math>: 432.13; Found 432.21.</p>                                                                                                                                                                                                                                                                                                                                                                                                                                                                                                                                                                                              |
| <p><i>N'</i>-(9<i>H</i>-Fluoren-9-ylidene)-4-methyl-<i>N</i>-phenylbenzenesulfonhydrazide (<b>5f</b>)</p>                      |                                                                                                                                                                                                                                                                                                                                                                                                                                                                                                                                                                                                                                                                                                                                                                                                                                                                                                                                                                                                                                                                                                               |
|  <p style="text-align: center;"><b>5f</b></p> | <p><b>Nature:</b> Yellow solid: 10mg, yield: 12%;</p> <p><b>R<sub>f</sub></b> (25% EtOAc-Hexane):0.40;</p> <p>FTIR (KBr) <math>\nu_{\text{max}}</math>: 3331, 2953, 1715, 1609, 1489, 1355, 1215, 1187, 1090, 982, 916, 883, 814cm<sup>-1</sup>;</p> <p><math>^1\text{H}</math> NMR (CDCl<sub>3</sub>/TMS, 400 MHz,):<math>\delta</math> 8.18 (d, <math>J = 7.7</math> Hz, 1H), 7.76 (dd, <math>J = 7.9, 3.9</math> Hz, 1H), 7.47 – 7.42 (m, 4H), 7.34 (td, <math>J = 7.5, 1.0</math> Hz, 1H), 7.28 (td, <math>J = 7.5, 0.9</math> Hz, 1H), 7.22 (ddd, <math>J = 8.4, 3.5, 1.7</math> Hz, 3H), 7.16 (dd, <math>J = 8.4, 4.5</math> Hz, 3H), 7.14 – 7.07 (m, 3H), 2.36 (s, 3H);</p> <p><math>^{13}\text{C}</math> NMR (CDCl<sub>3</sub>/TMS, 100 MHz): <math>\delta</math> 166.8, 144.3, 413.2, 143.1, 141.8, 136.6, 132.5, 133.0, 130.9, 130.1, 129.9, 129.8(2C), 128.7, 128.5(2C), 128.2(2C), 127.0(2C), 124.9, 123.2(2C), 119.9, 119.8, 21.7;</p> <p><b>HRMS-ESI:</b> Calcd. for C<sub>26</sub>H<sub>20</sub>N<sub>2</sub>O<sub>2</sub>SNa [M+Na]<sup>+</sup><math>m/z</math>:447.1143; Found 447.1143.</p> |

## Supporting Information

### 4. Copies of NMR and HRMS Spectra

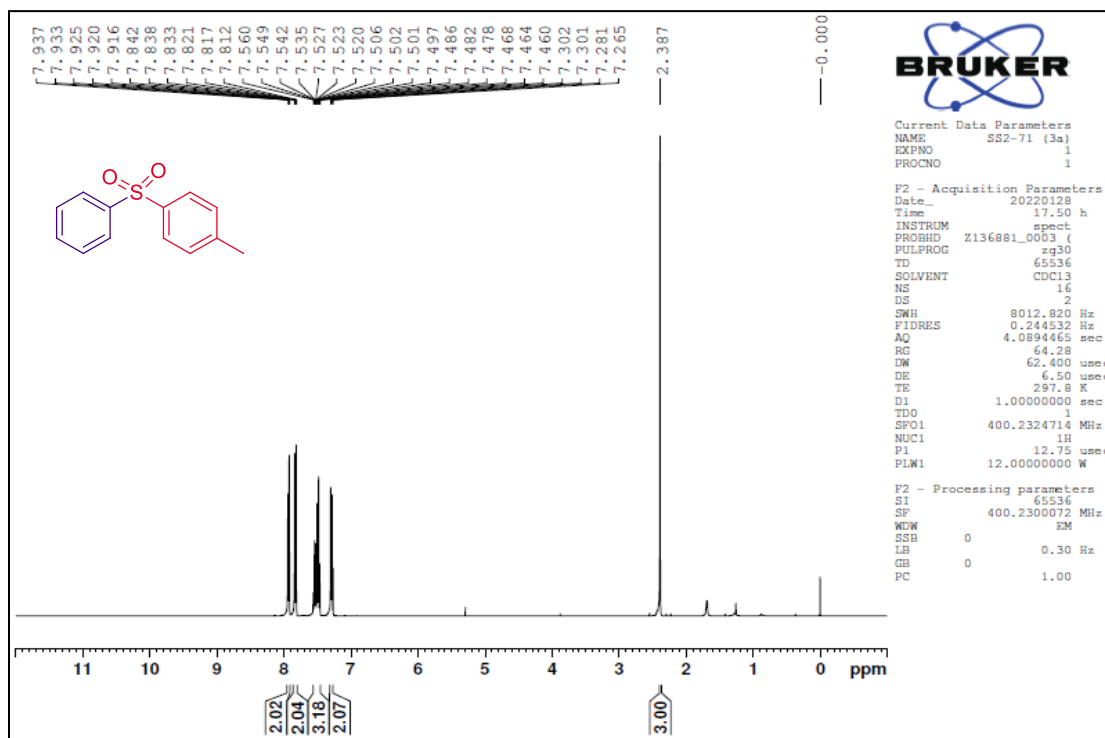

Figure 1. <sup>1</sup>H NMR spectrum of compound 3a

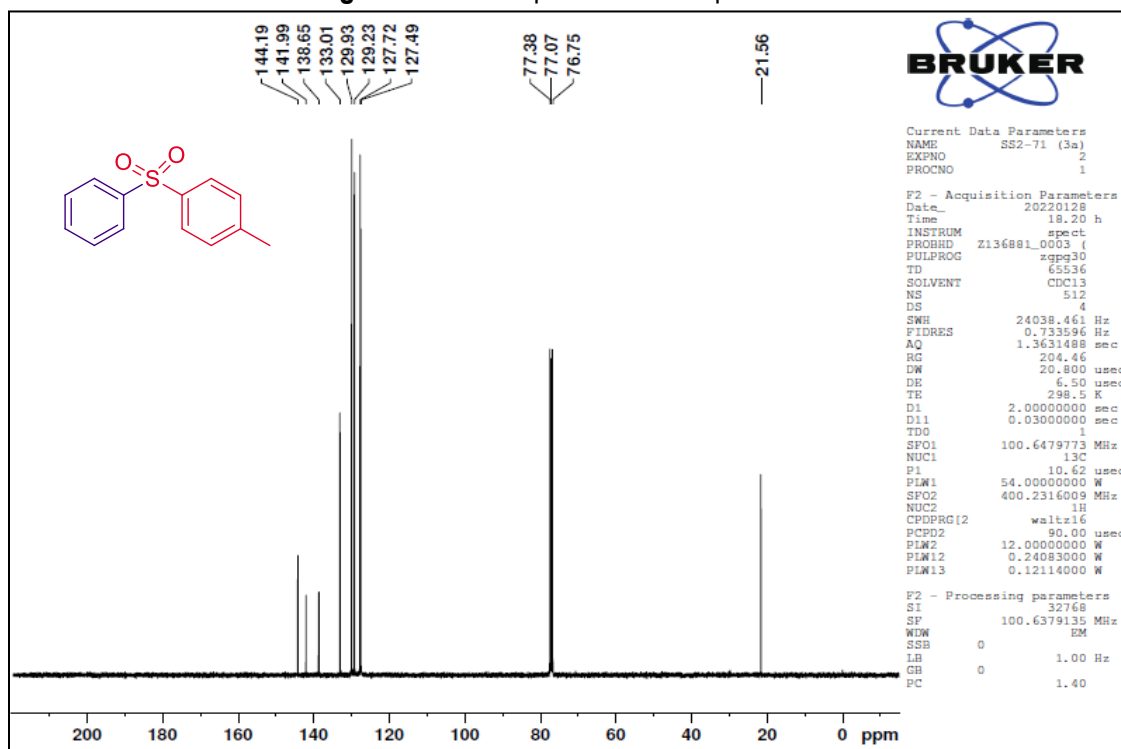

Figure 2. <sup>13</sup>C NMR spectrum of compound 3a

## Supporting Information

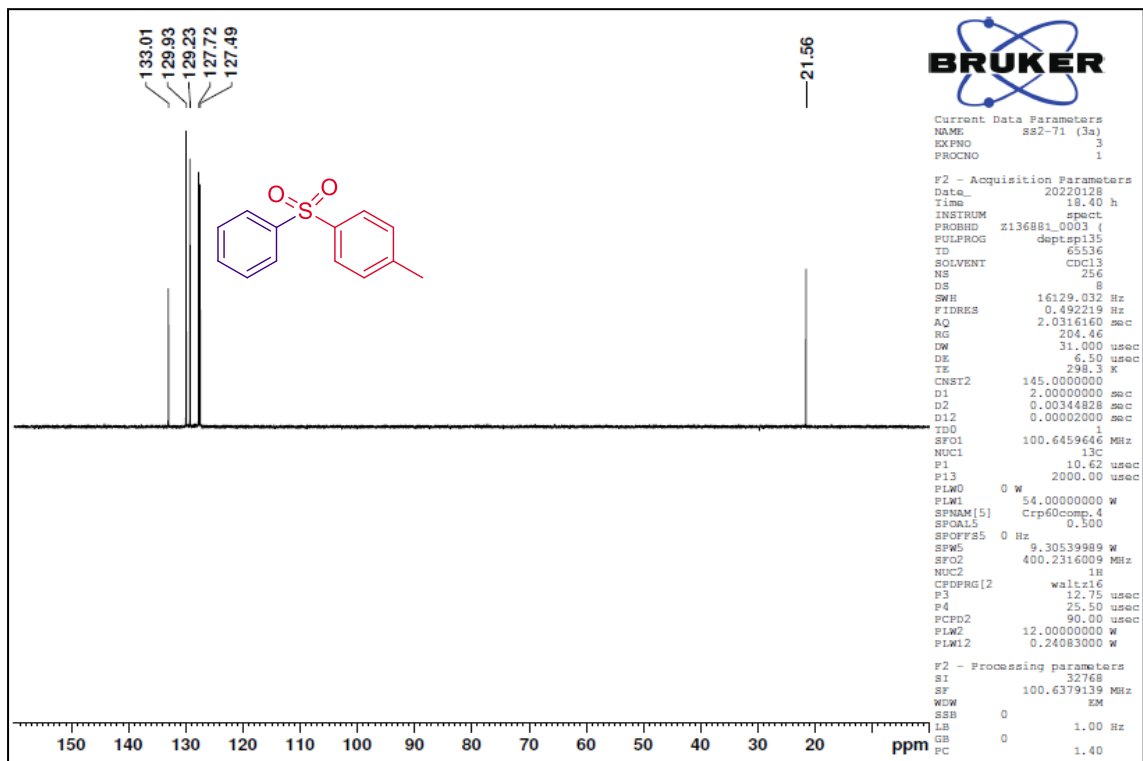

**Figure 3.**DEPT135 NMR spectrum of compound **3a**

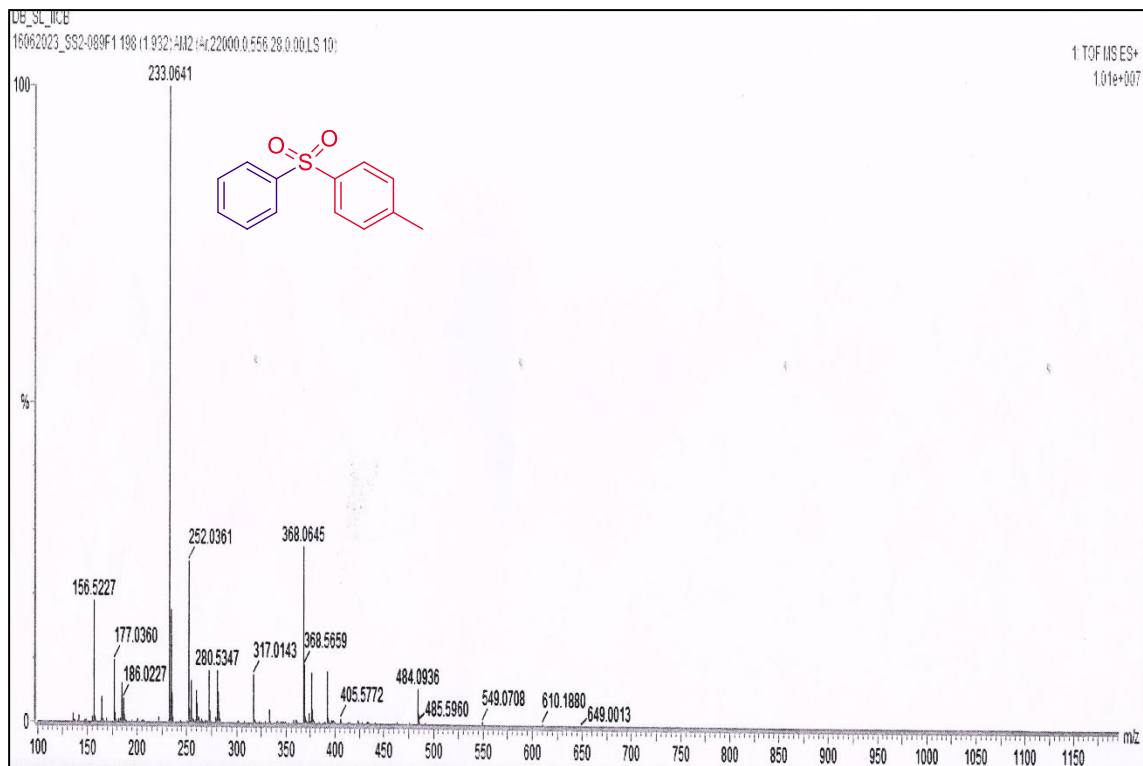

**Figure 4.**HRMS spectrum of compound **3a**

## Supporting Information

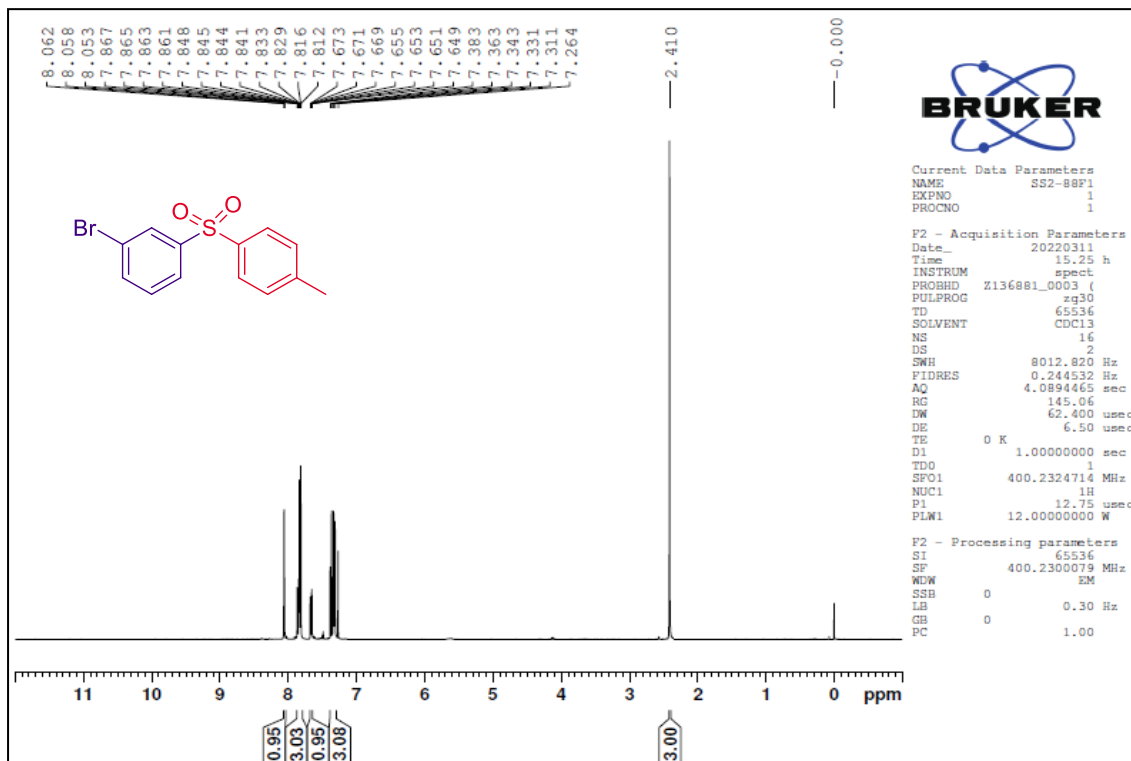

Figure 5. <sup>1</sup>H NMR spectrum of compound **3b**

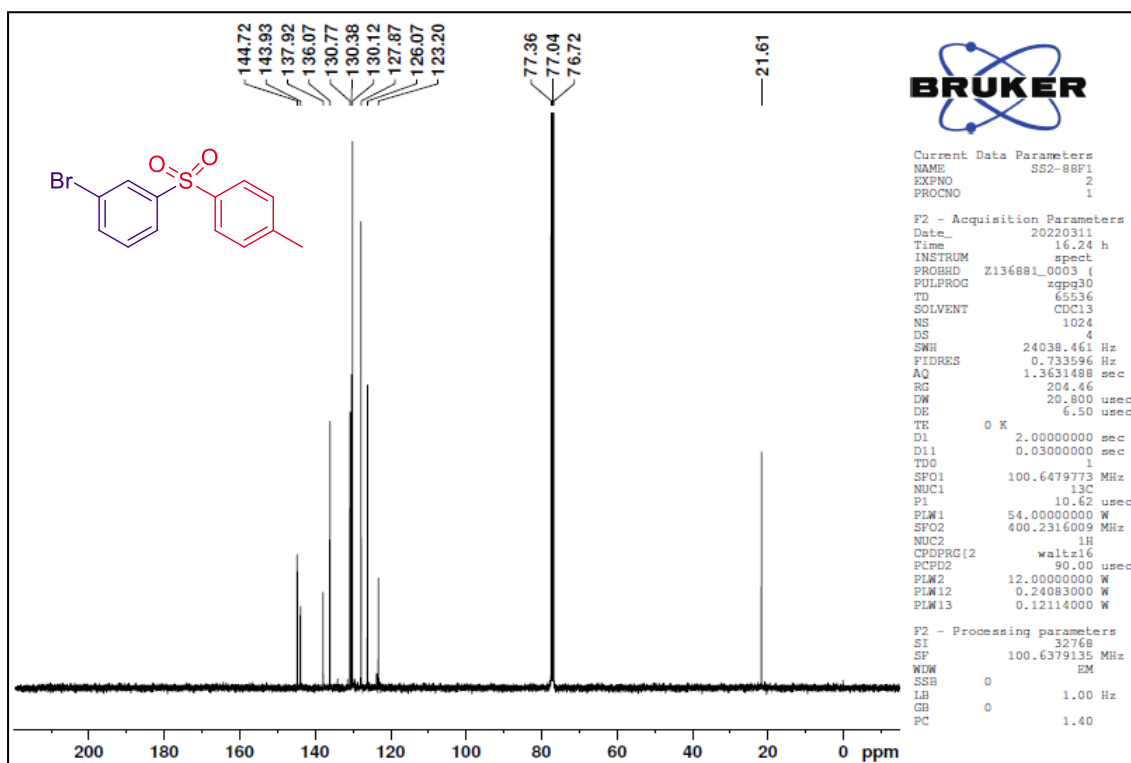

Figure 6. <sup>13</sup>C NMR spectrum of compound **3b**

# Supporting Information

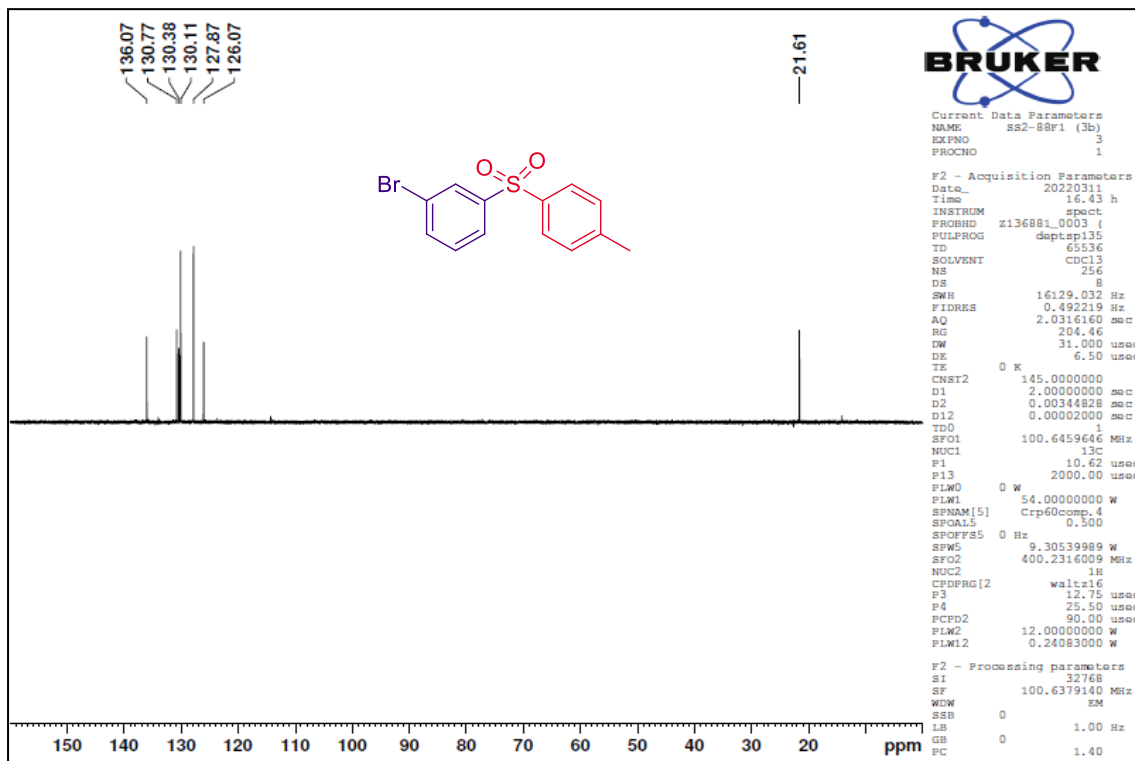

Figure 7. DEPT135 NMR spectrum of compound 3b

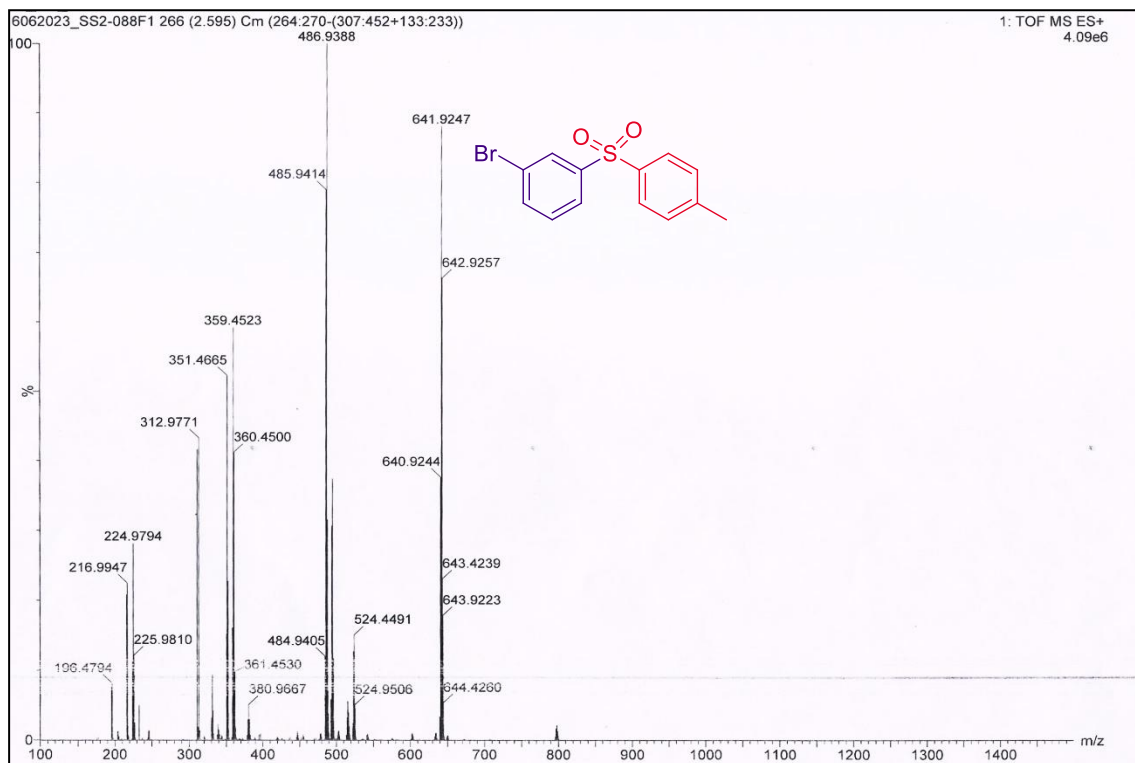

Figure 8. HRMS spectrum of compound 3b

## Supporting Information

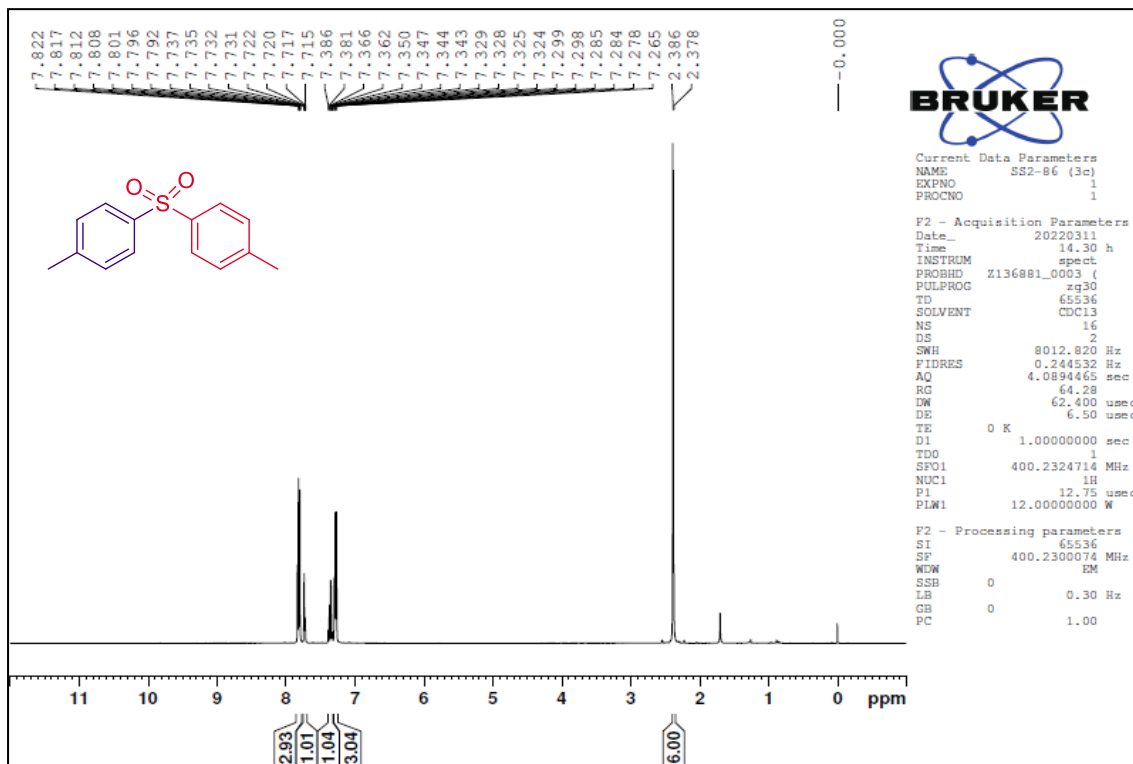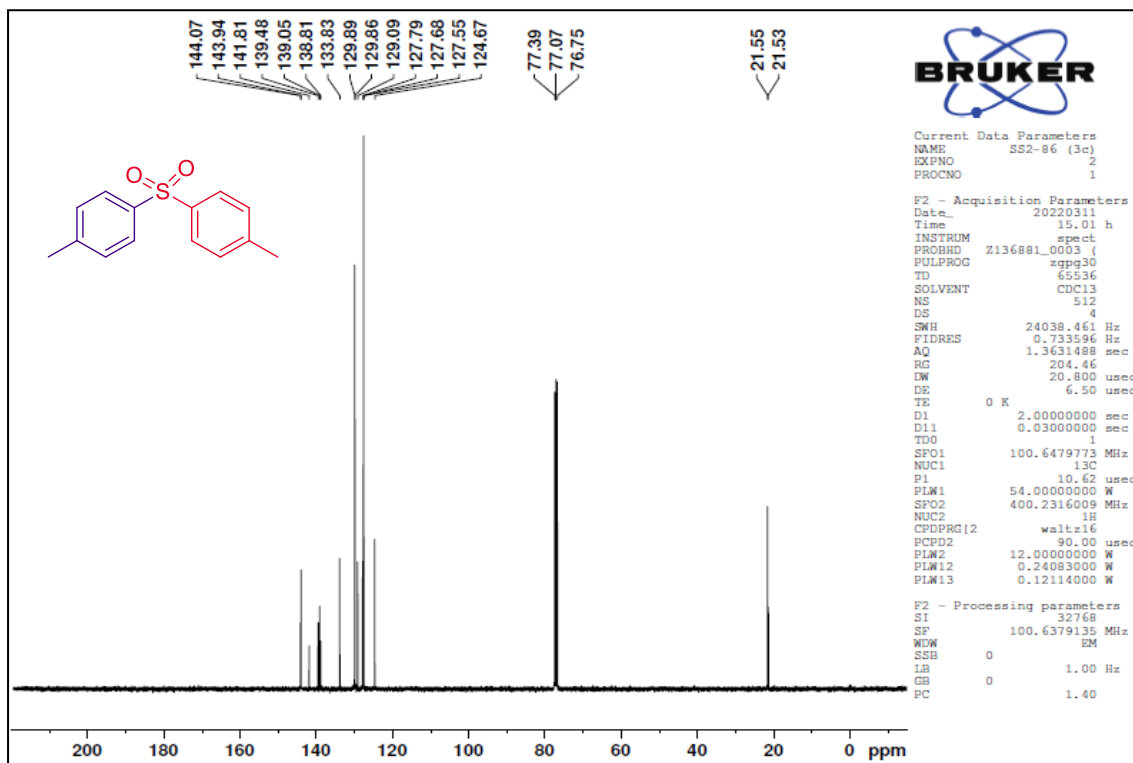

## Supporting Information

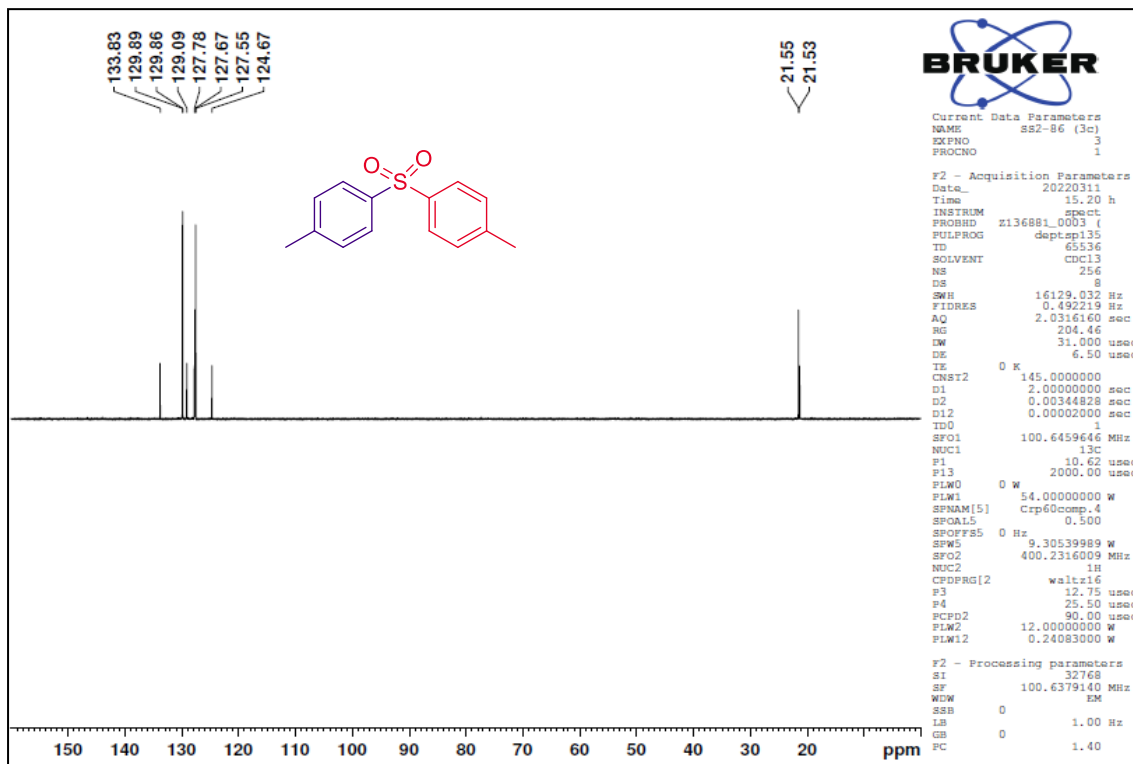

Figure 11. DEPT135 NMR spectrum of compound 3c

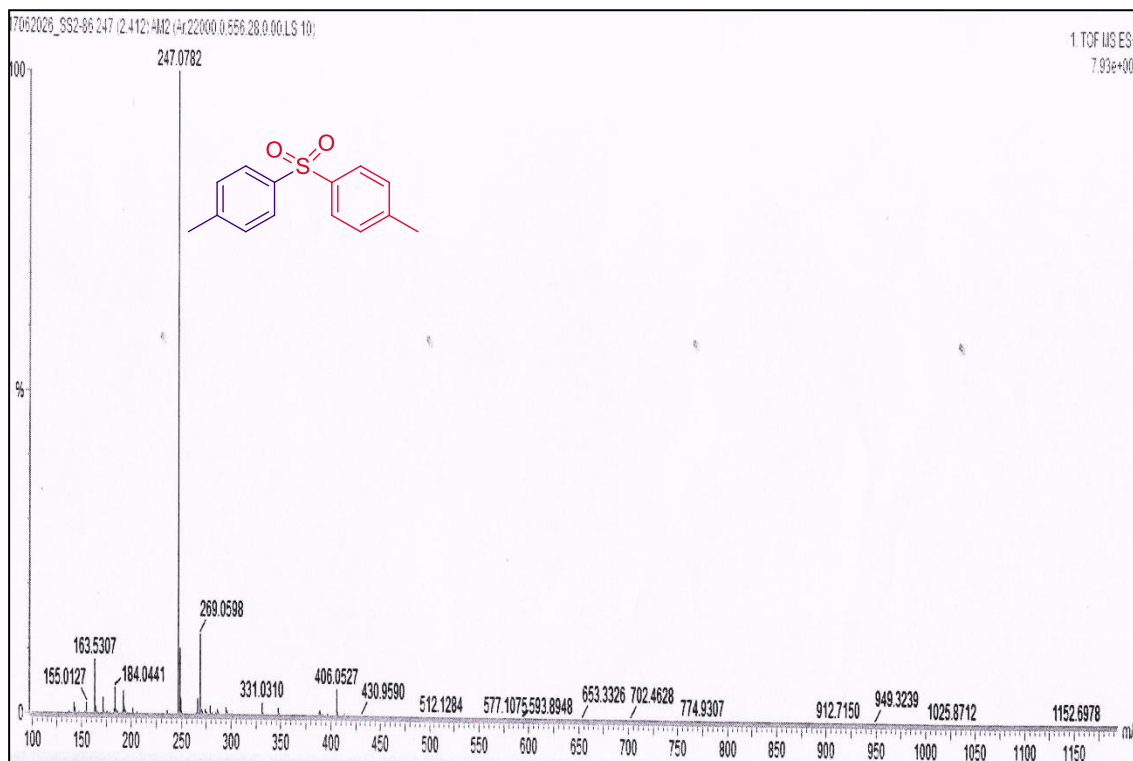

Figure 12. HRMS spectrum of compound 3c



## Supporting Information

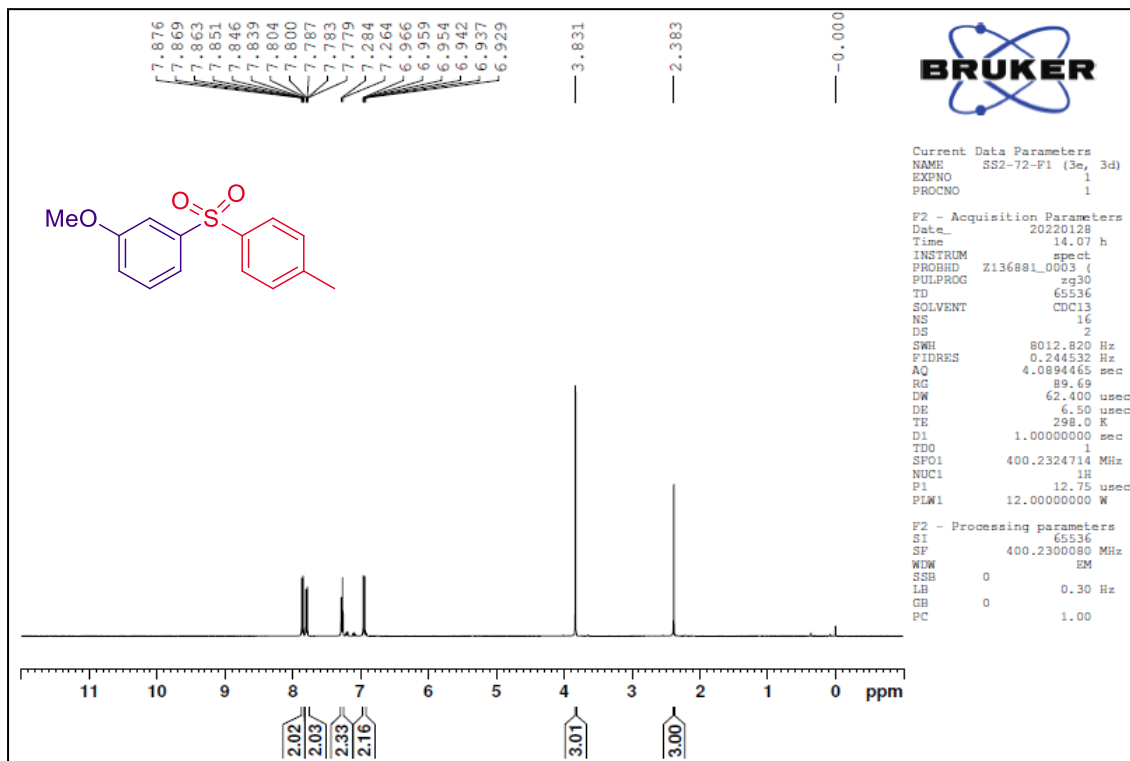

Figure 13. <sup>1</sup>H NMR spectrum of compound 3d

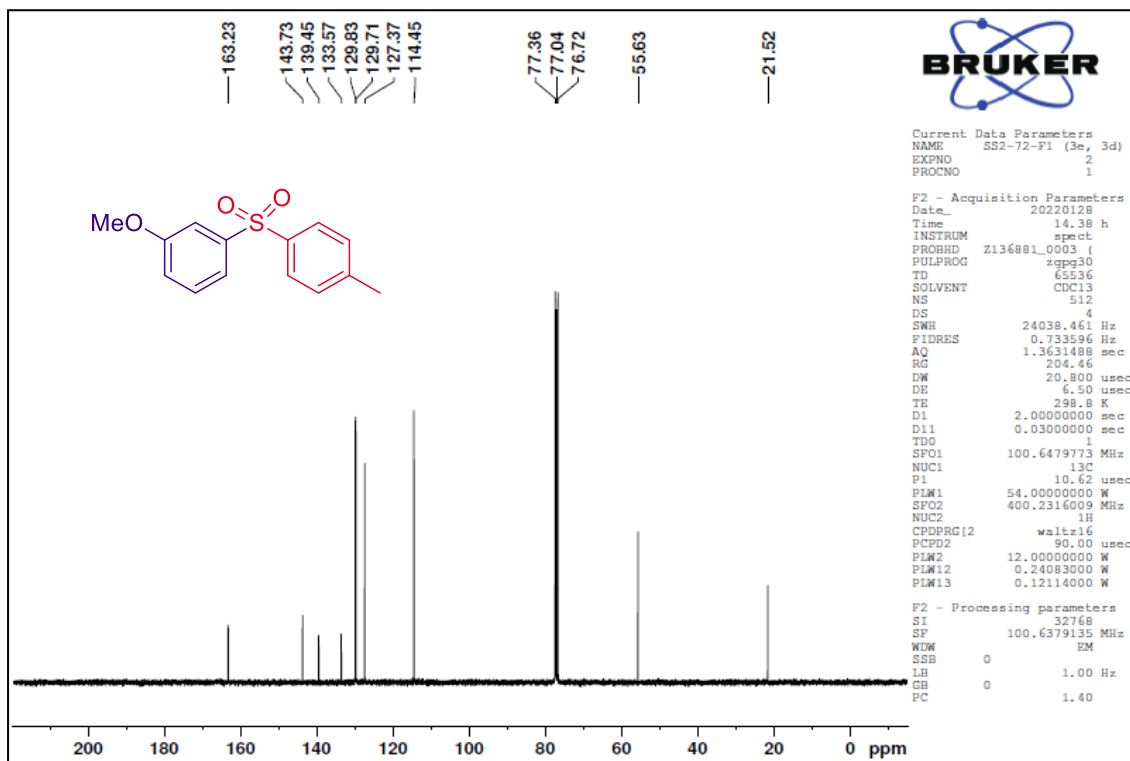

Figure 14. <sup>13</sup>C NMR spectrum of compound 3d

# Supporting Information

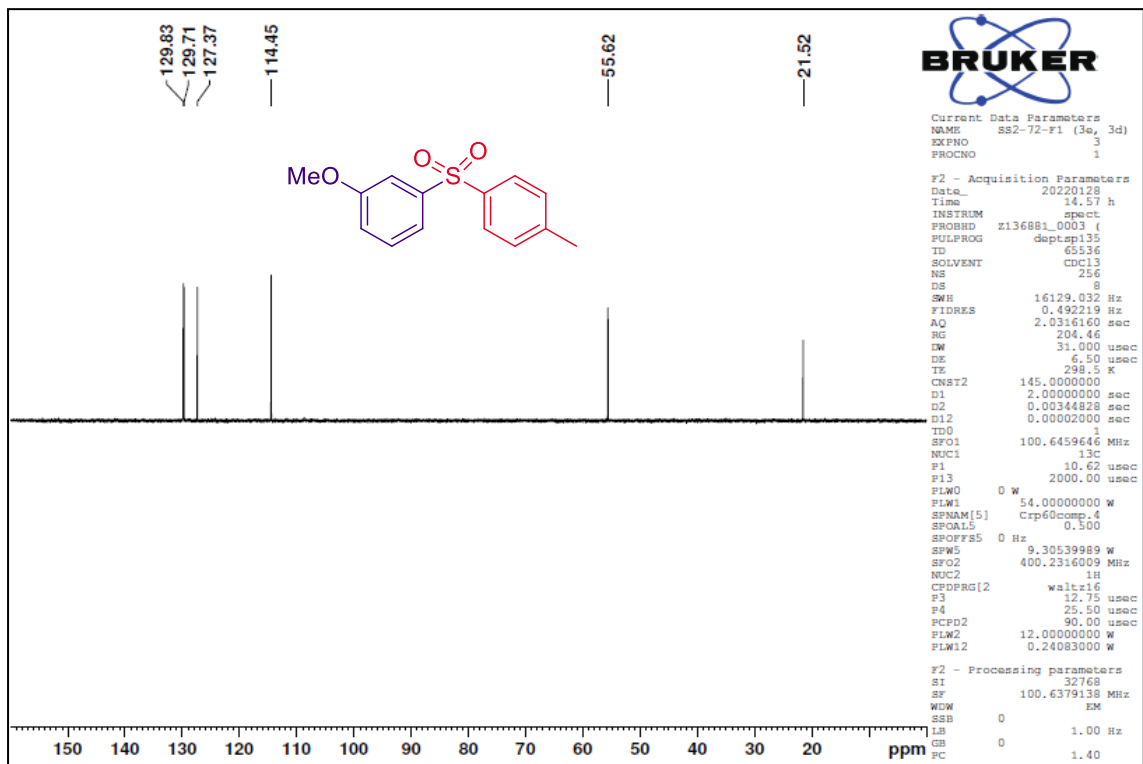

Figure 15. DEPT135 NMR spectrum of compound 3d

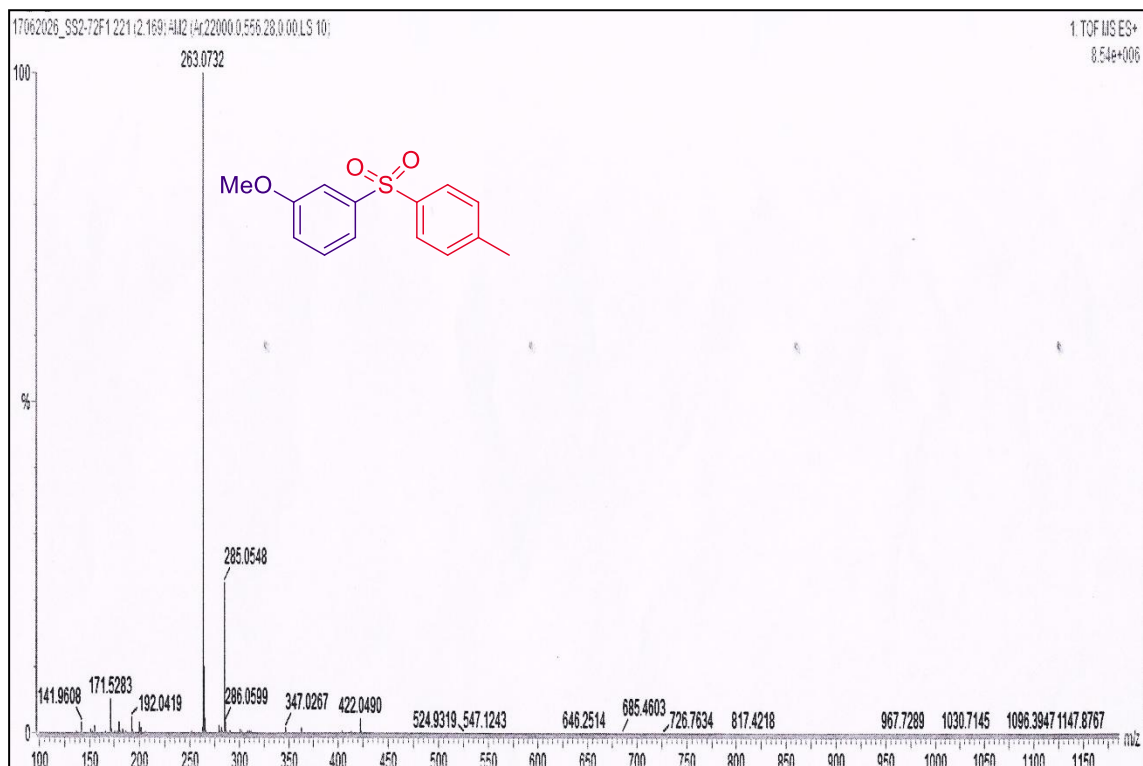

Figure 16. HRMS spectrum of compound 3d

## Supporting Information

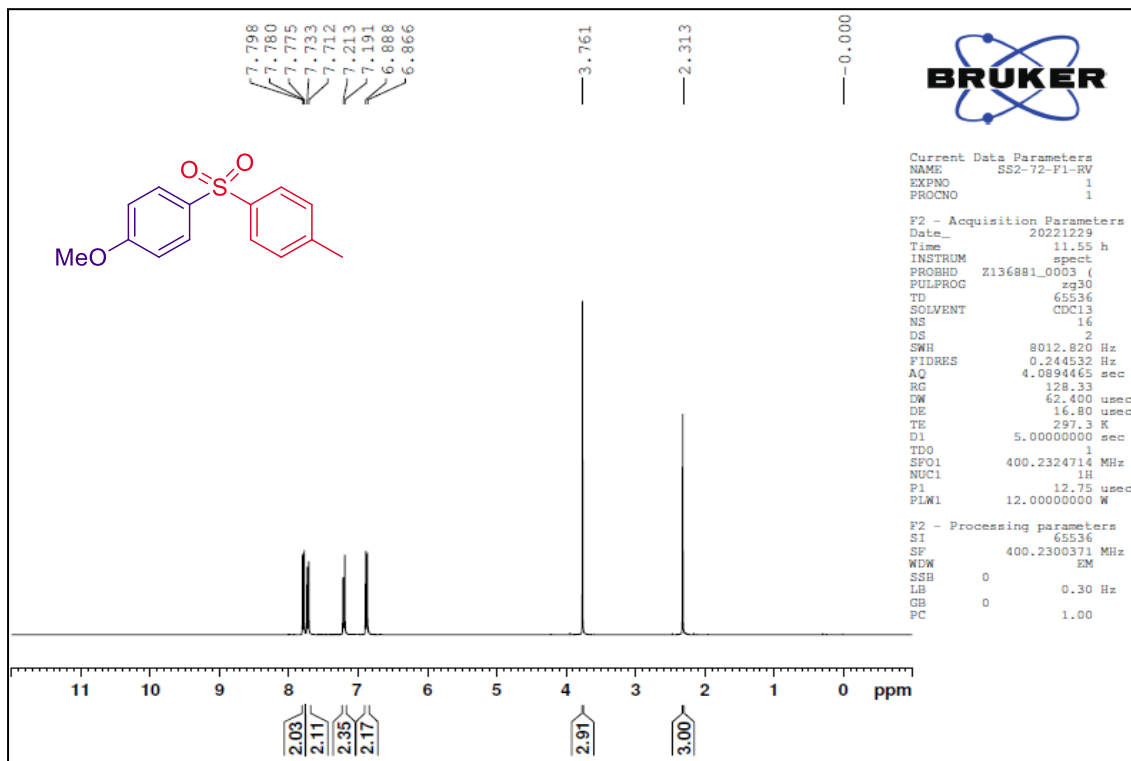

Figure 17. <sup>1</sup>H NMR spectrum of compound 3e

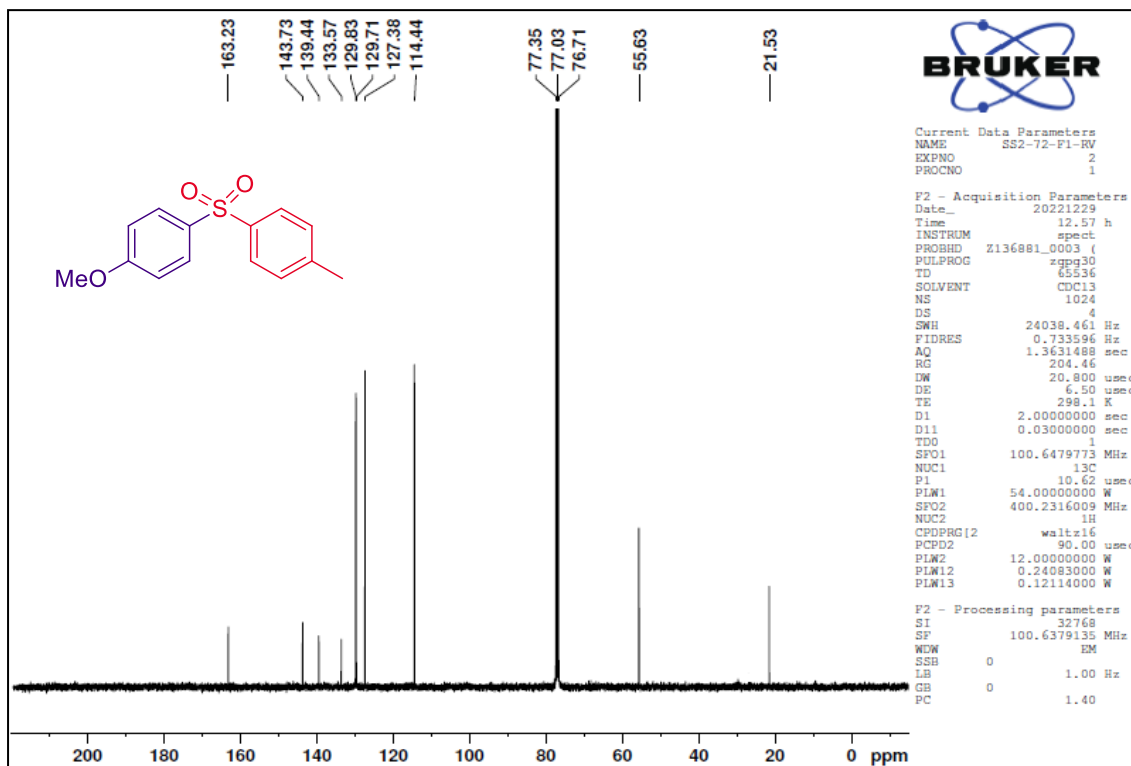

Figure 18. <sup>13</sup>C NMR spectrum of compound 3e

## Supporting Information

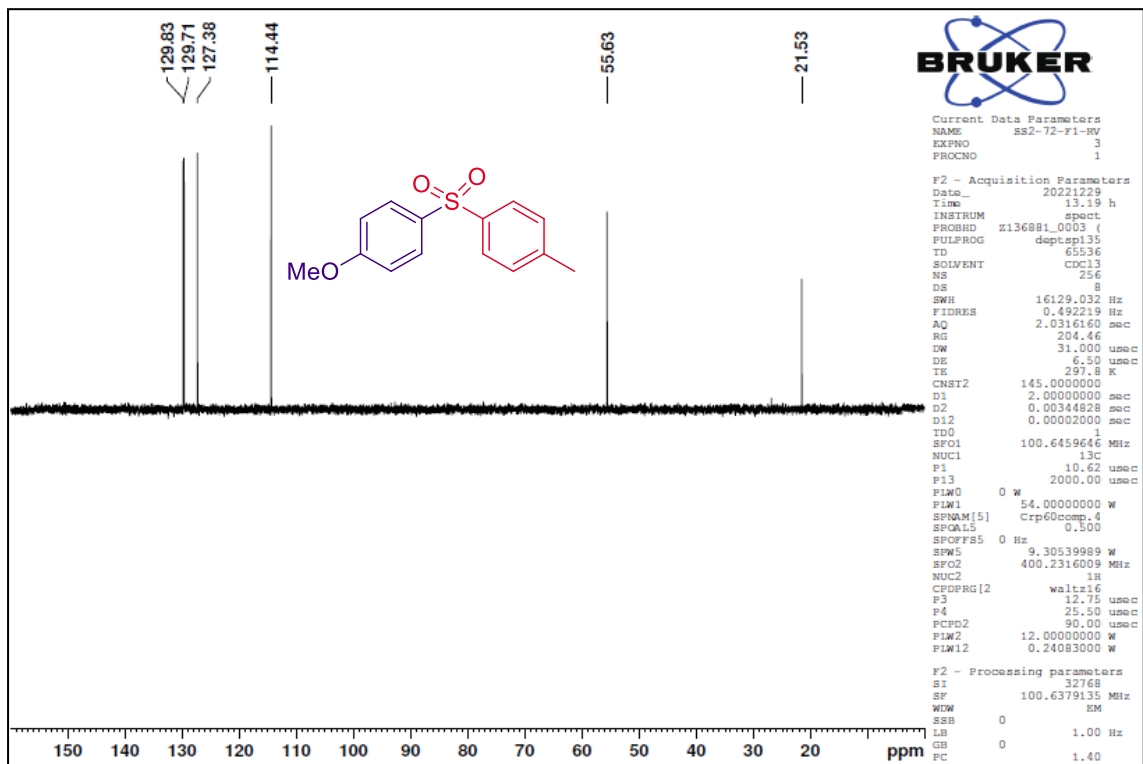

Figure 19. DEPT-135 NMR spectrum of compound **3e**

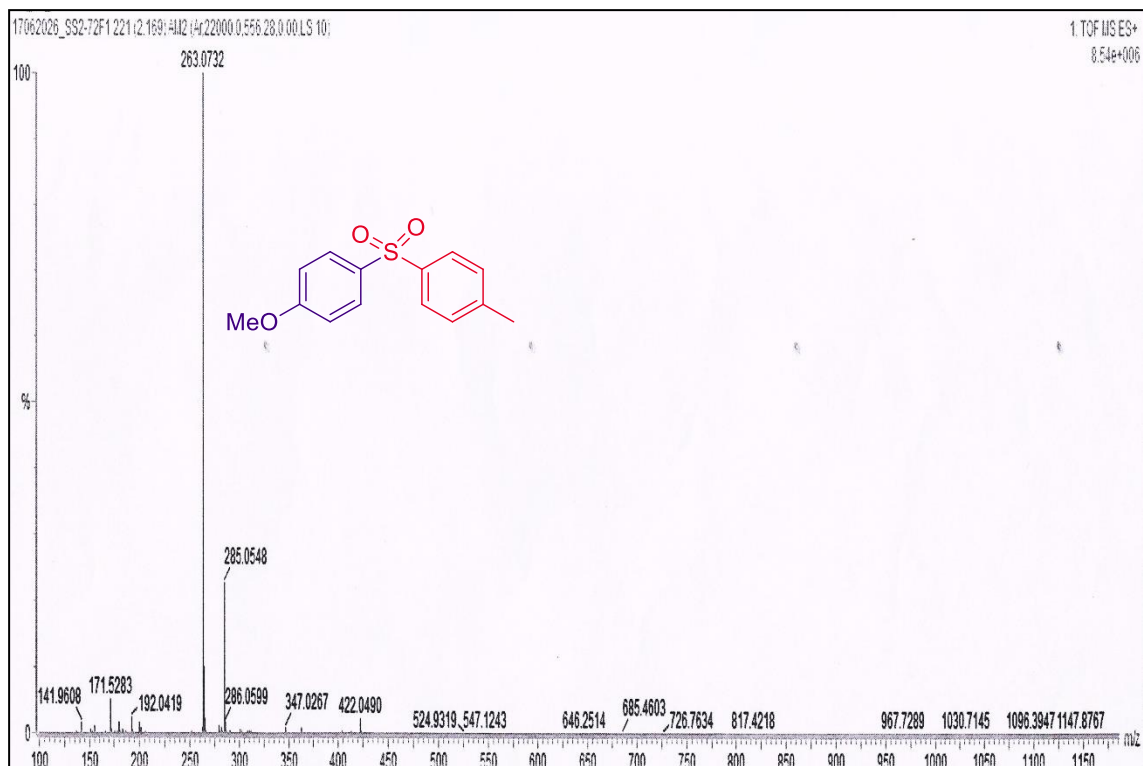

Figure 20. HRMS spectrum of compound **3e**

## Supporting Information

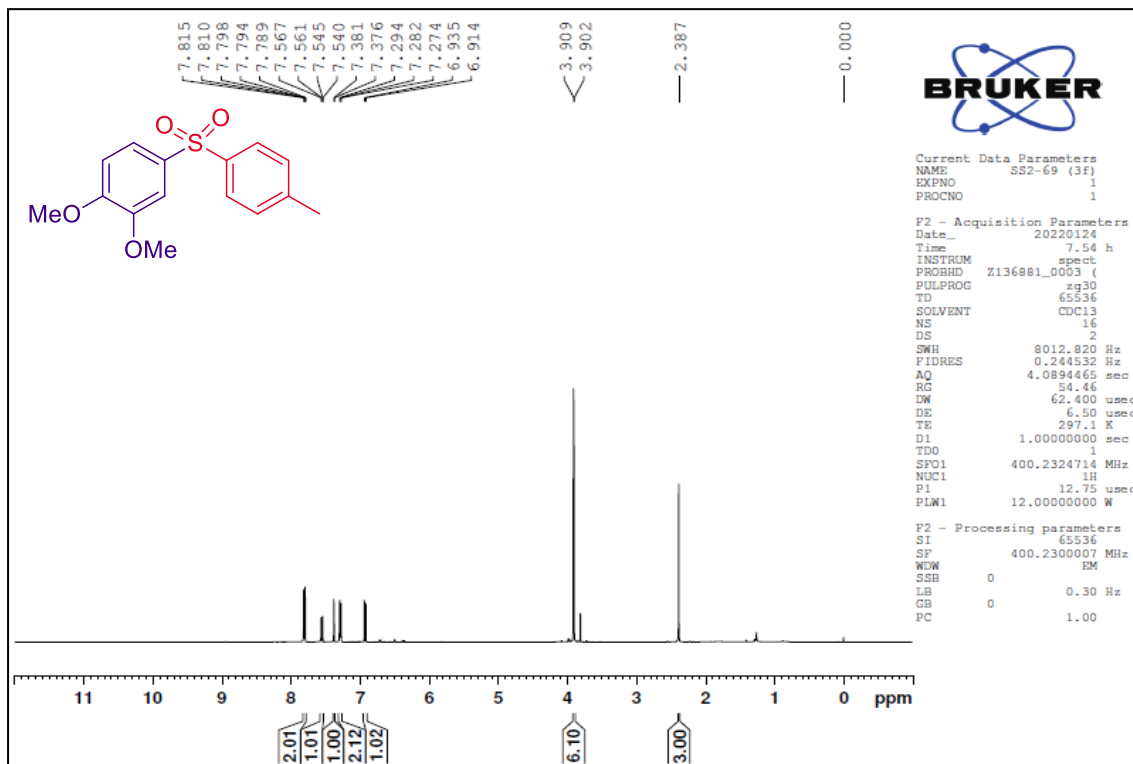

**Figure 21.** <sup>1</sup>H NMR spectrum of compound **3f**

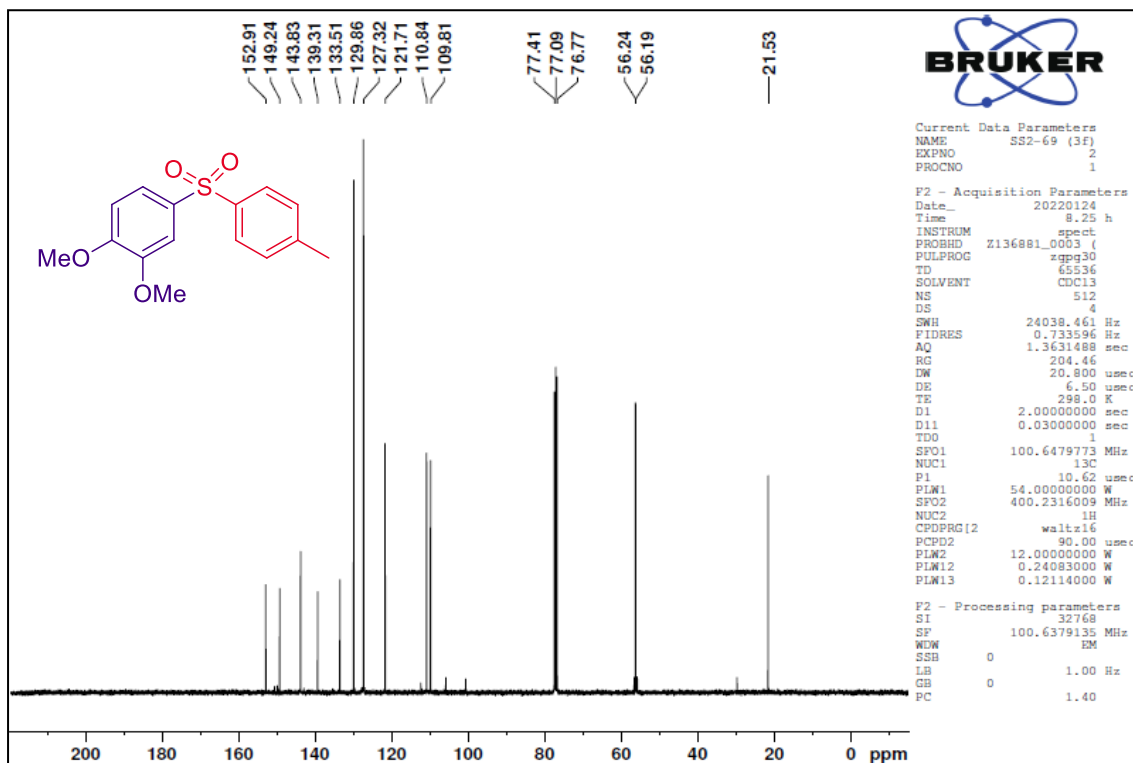

**Figure 22.** <sup>13</sup>C NMR spectrum of compound **3f**

## Supporting Information

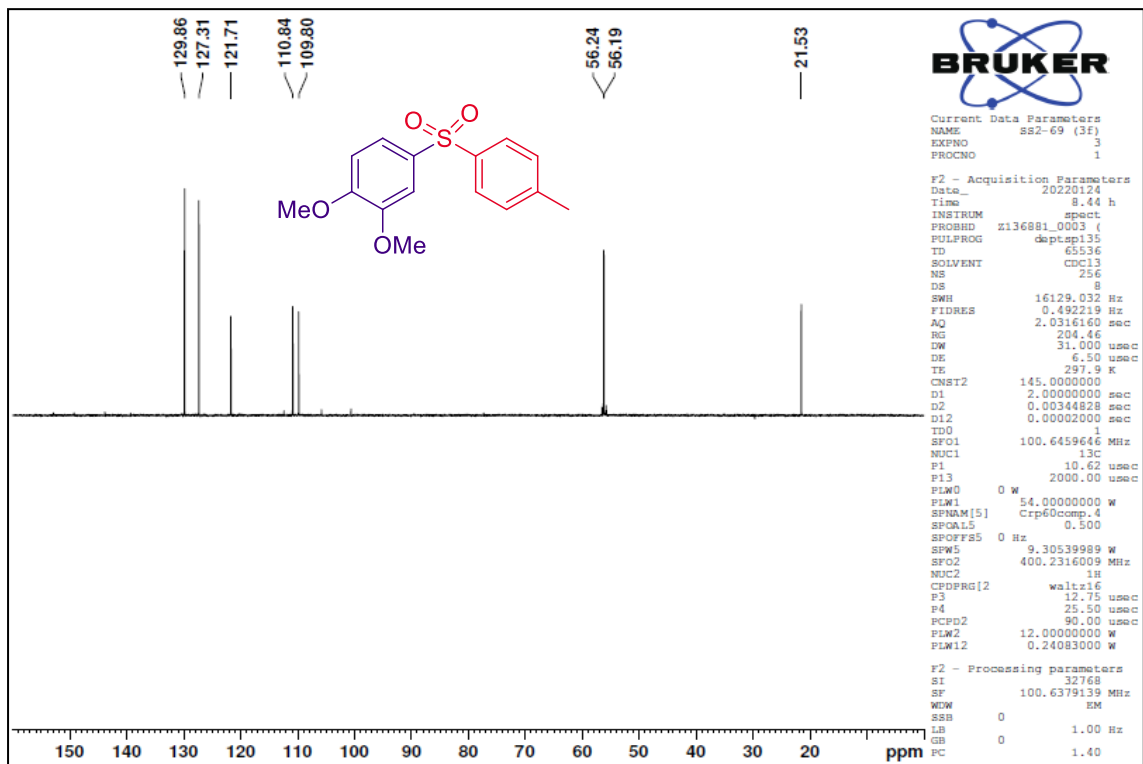

**Figure 23.**DEPT135 NMR spectrum of compound **3f**

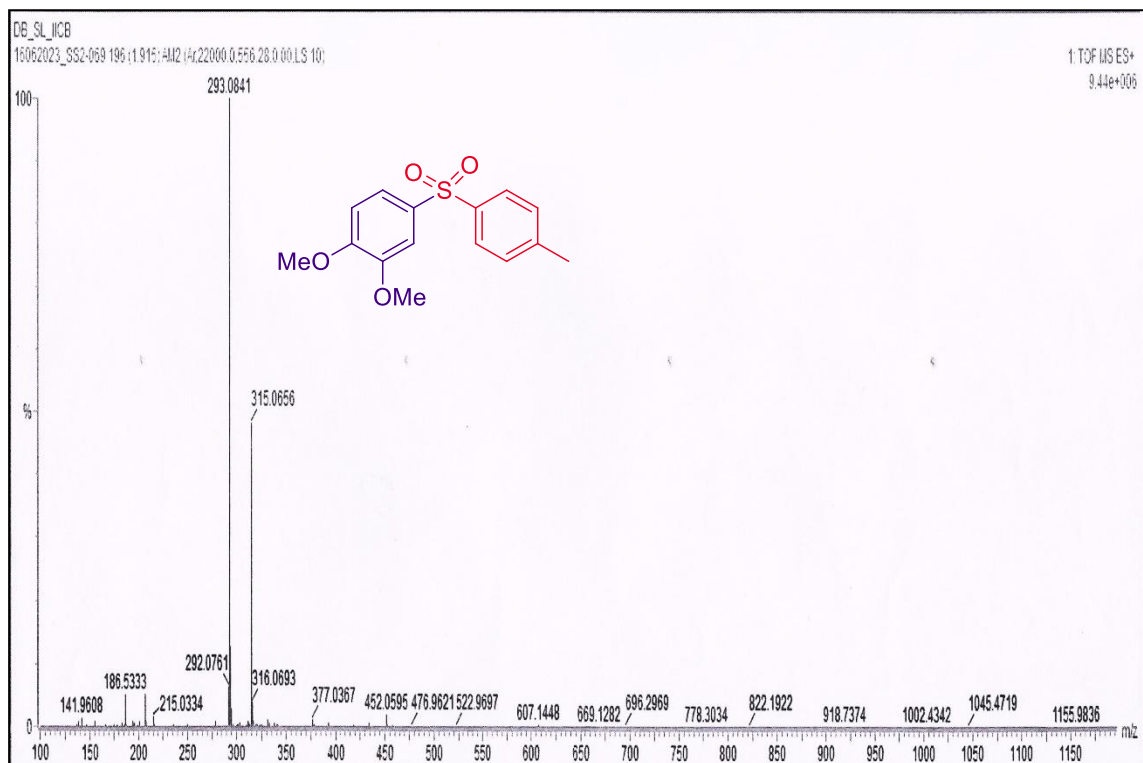

**Figure 24.**HRMS spectrum of compound **3f**

## Supporting Information

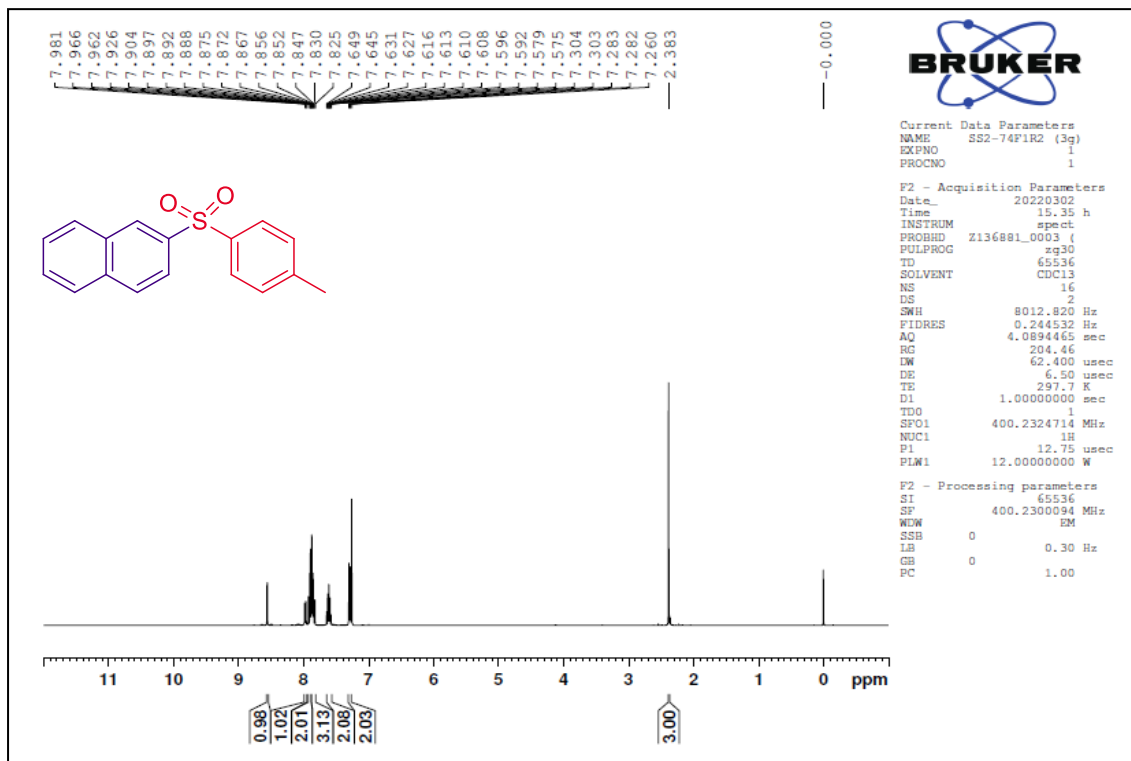

Figure 25. <sup>1</sup>H NMR spectrum of compound 3g

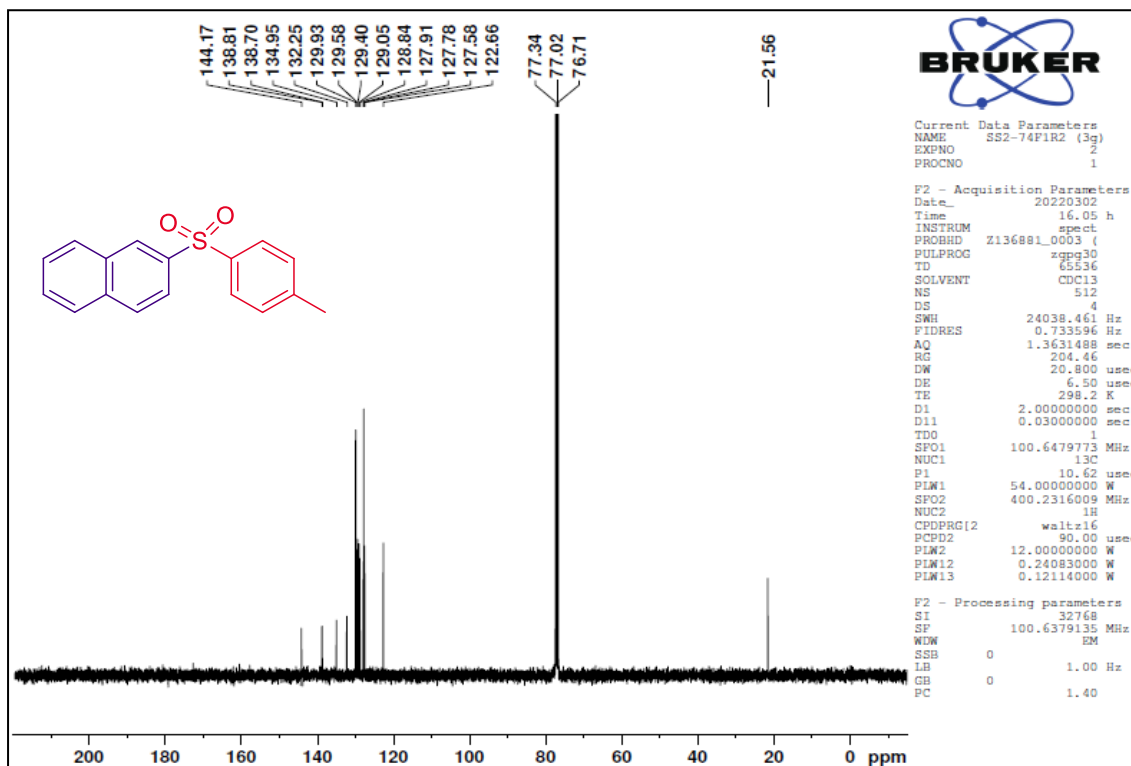

Figure 26. <sup>13</sup>C NMR spectrum of compound 3g

## Supporting Information

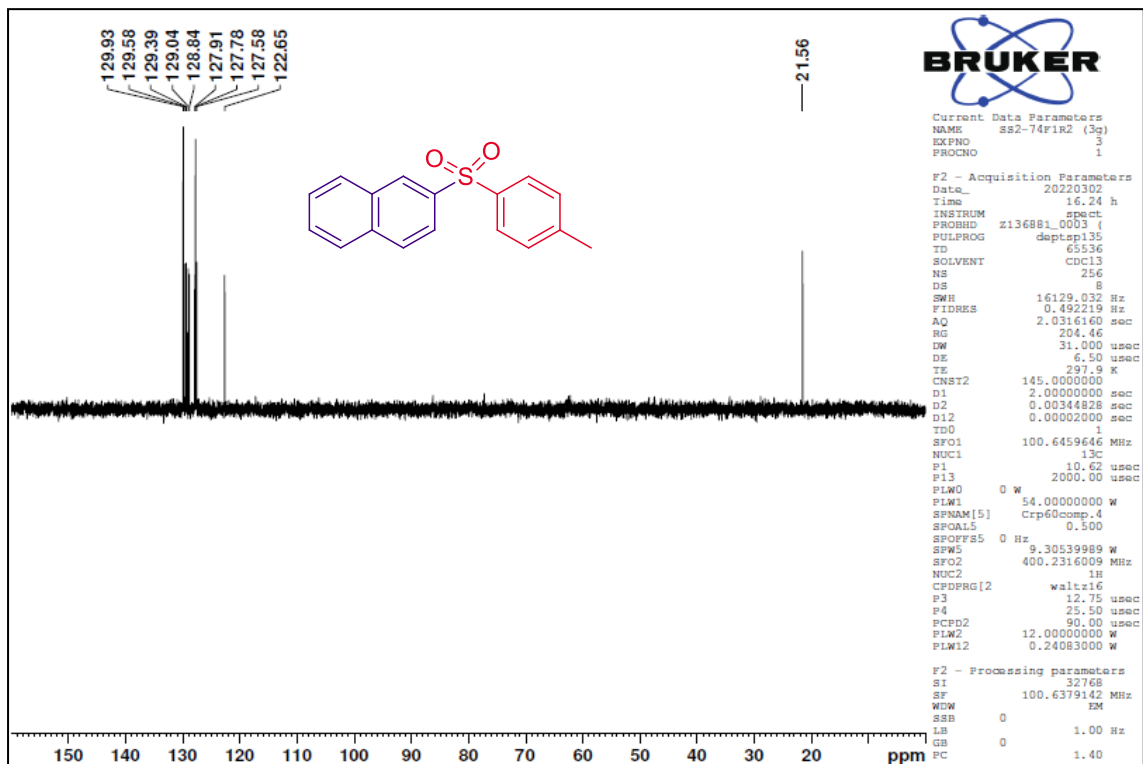

**Figure 27.**DEPT135 NMR spectrum of compound **3g**

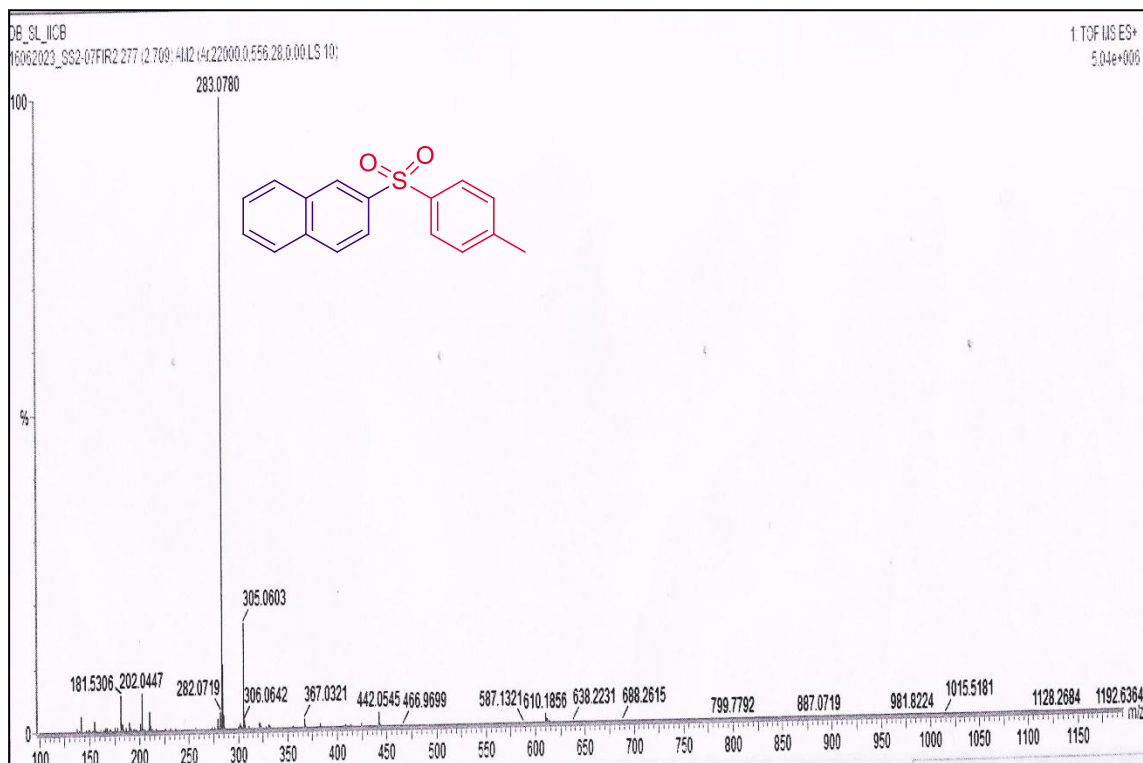

**Figure 28.**HRMS spectrum of compound **3g**



## Supporting Information

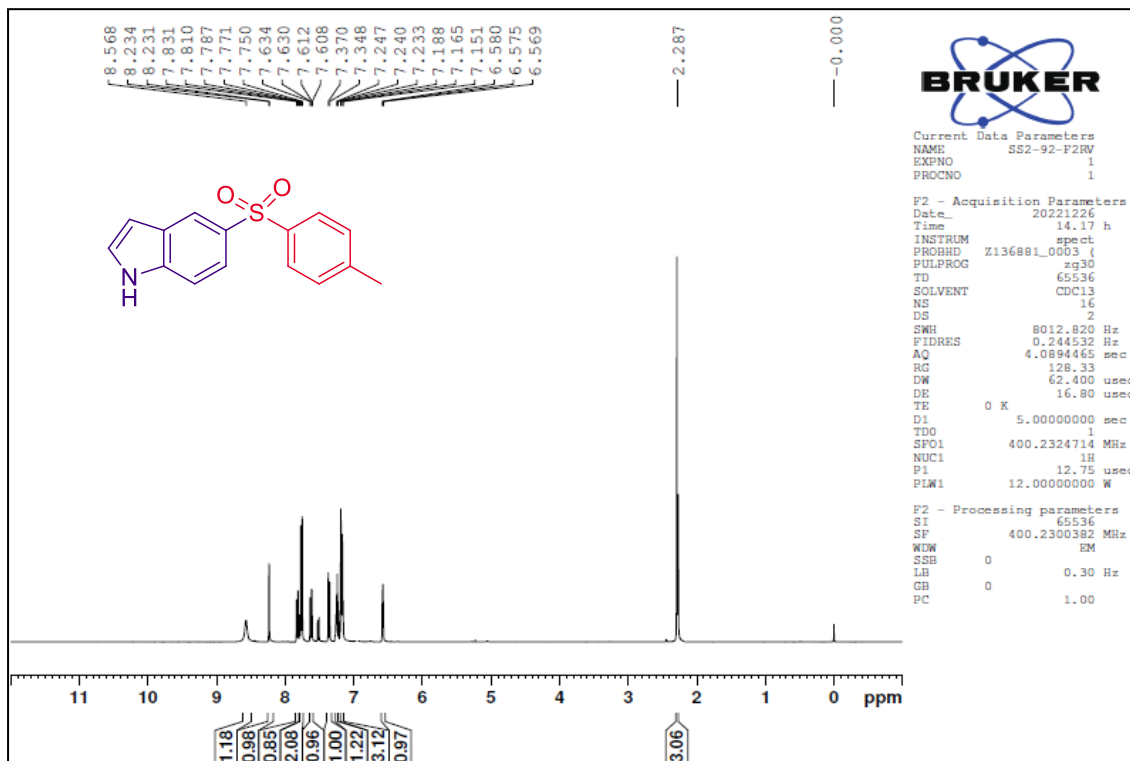

Figure 29. <sup>1</sup>H NMR spectrum of compound 3h

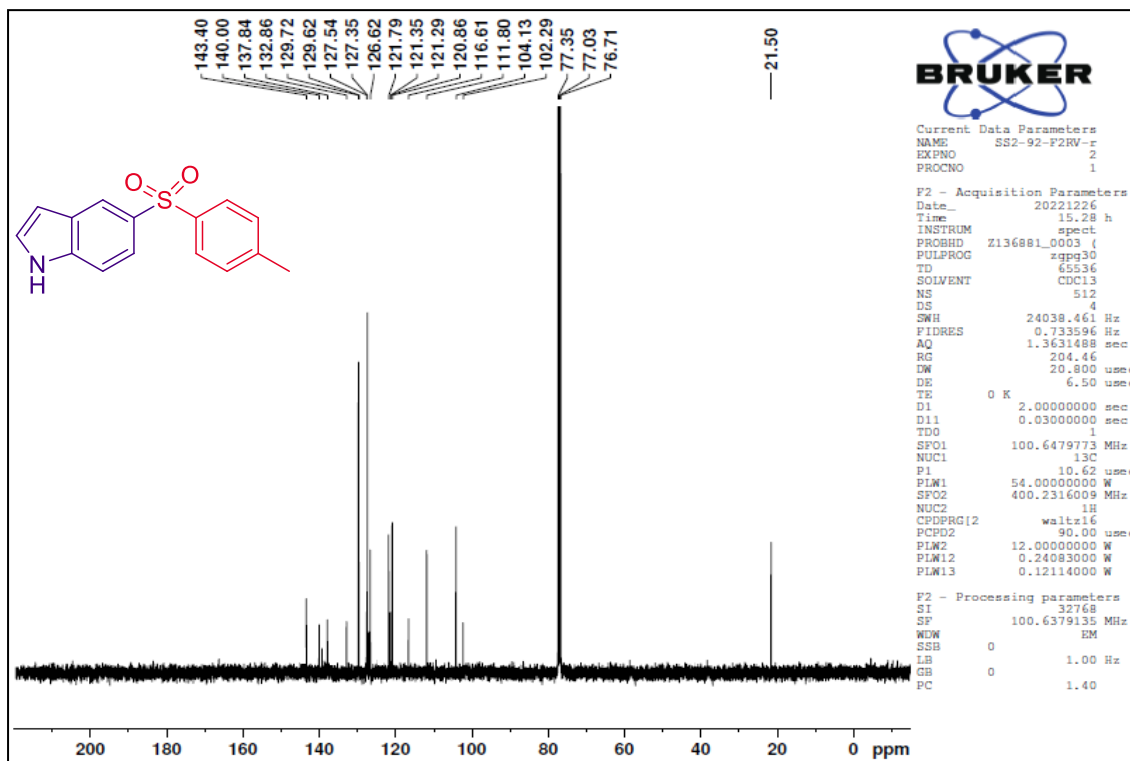

Figure 30. <sup>13</sup>C NMR spectrum of compound 3h

## Supporting Information

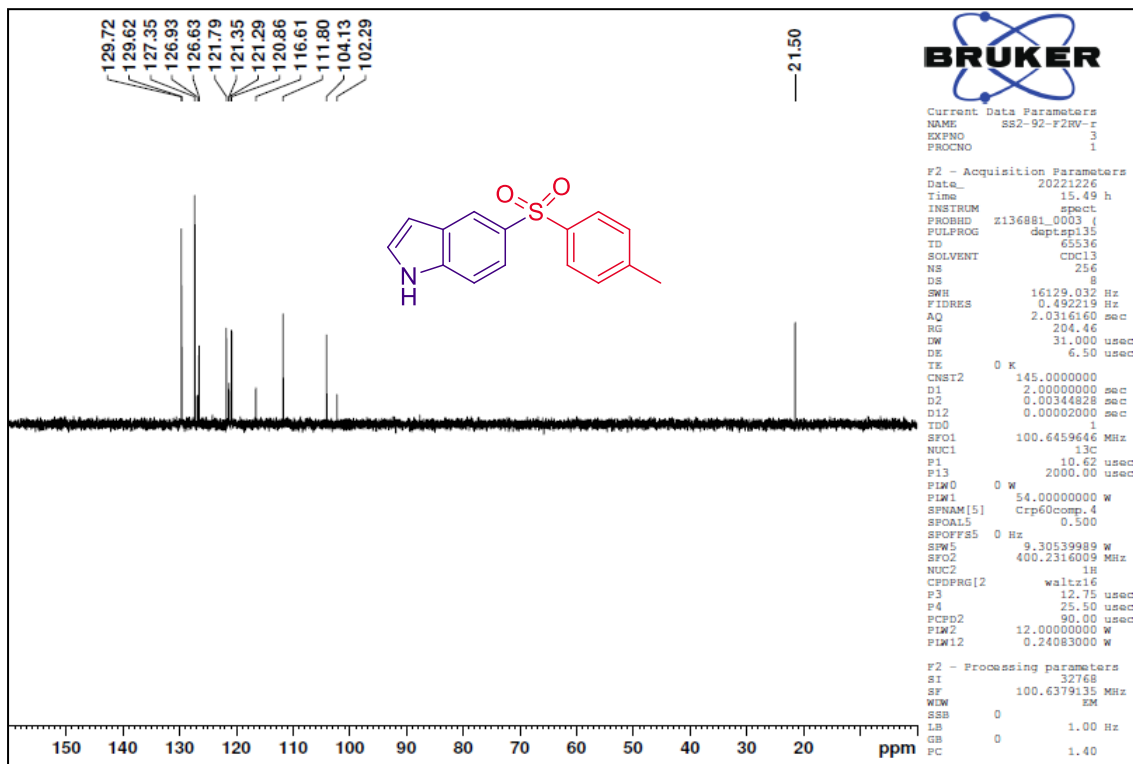

**Figure 31.**DEPT135 NMR spectrum of compound **3h**

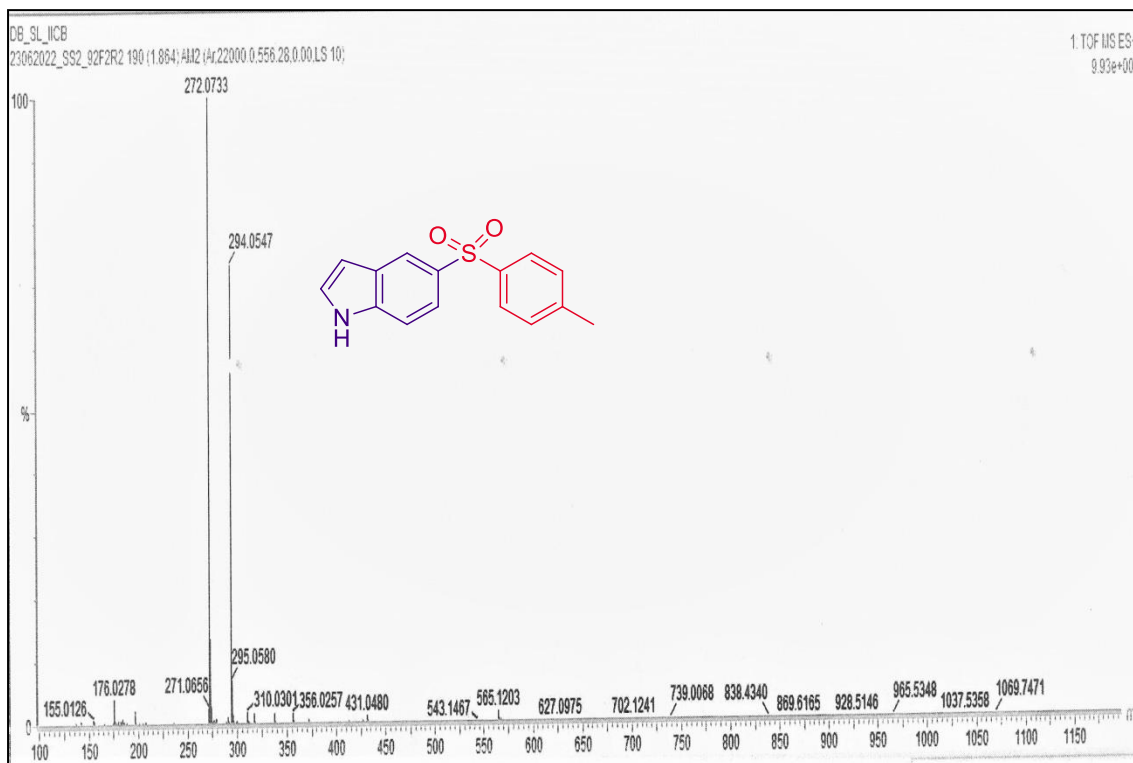

**Figure 32.**HRMS spectrum of compound **3h**

## Supporting Information

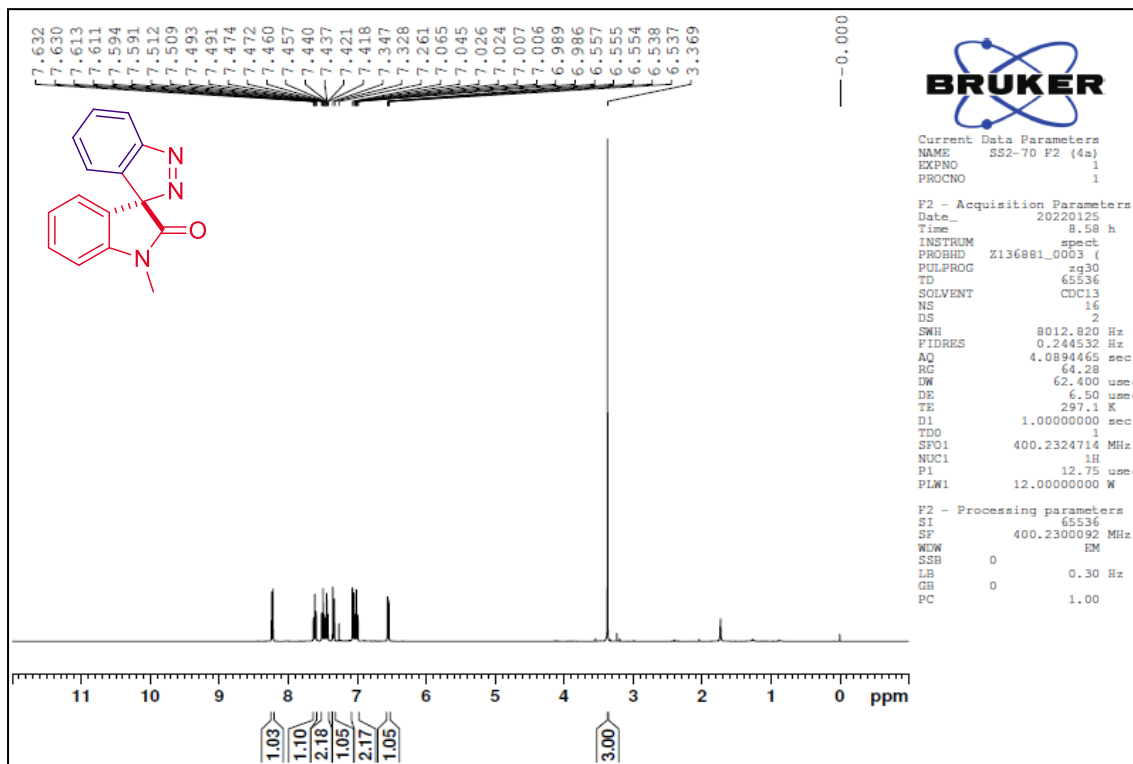

Figure 33. <sup>1</sup>H NMR spectrum of compound 4a

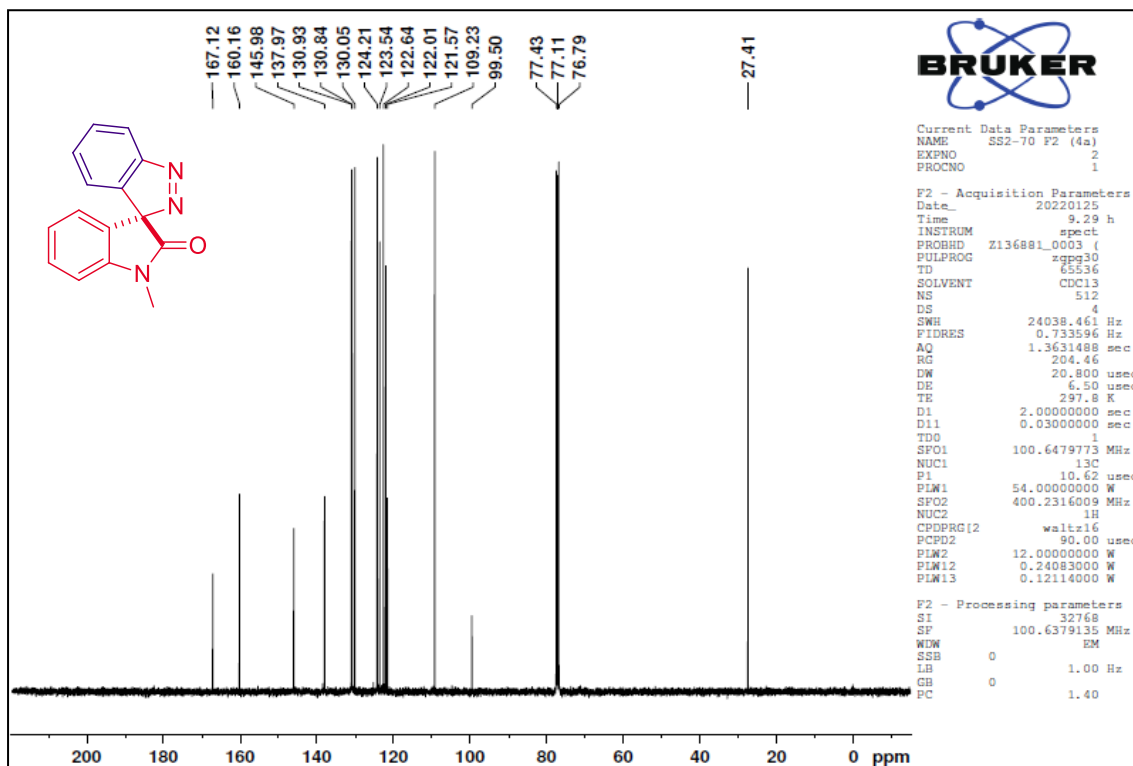

Figure 34. <sup>13</sup>C NMR spectrum of compound 4a

## Supporting Information

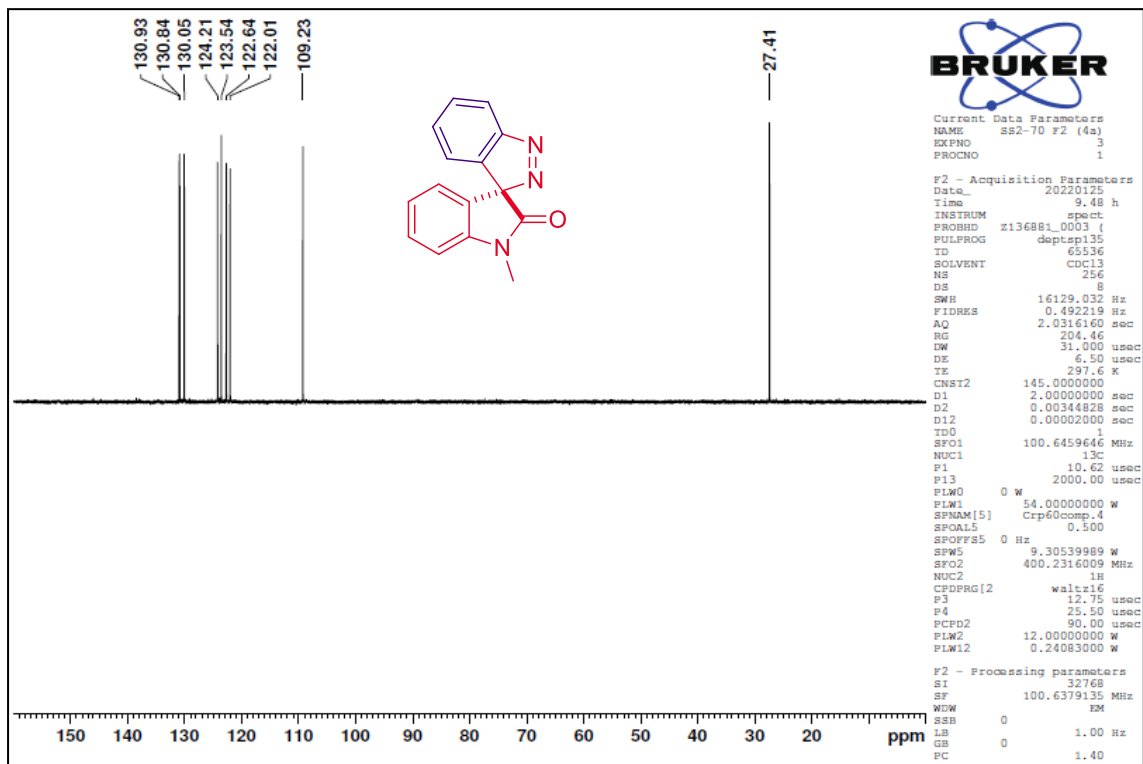

Figure 35. DEPT135 NMR spectrum of compound 4a

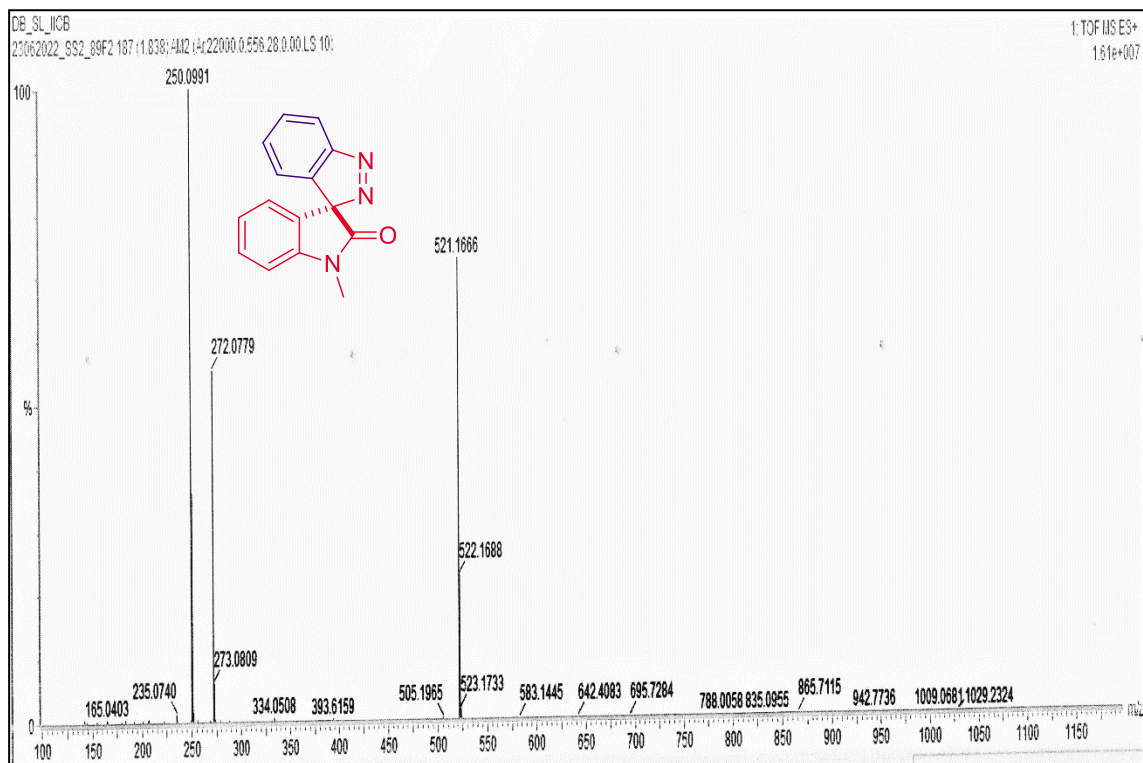

Figure 36. HRMS spectrum of compound 4a

## Supporting Information

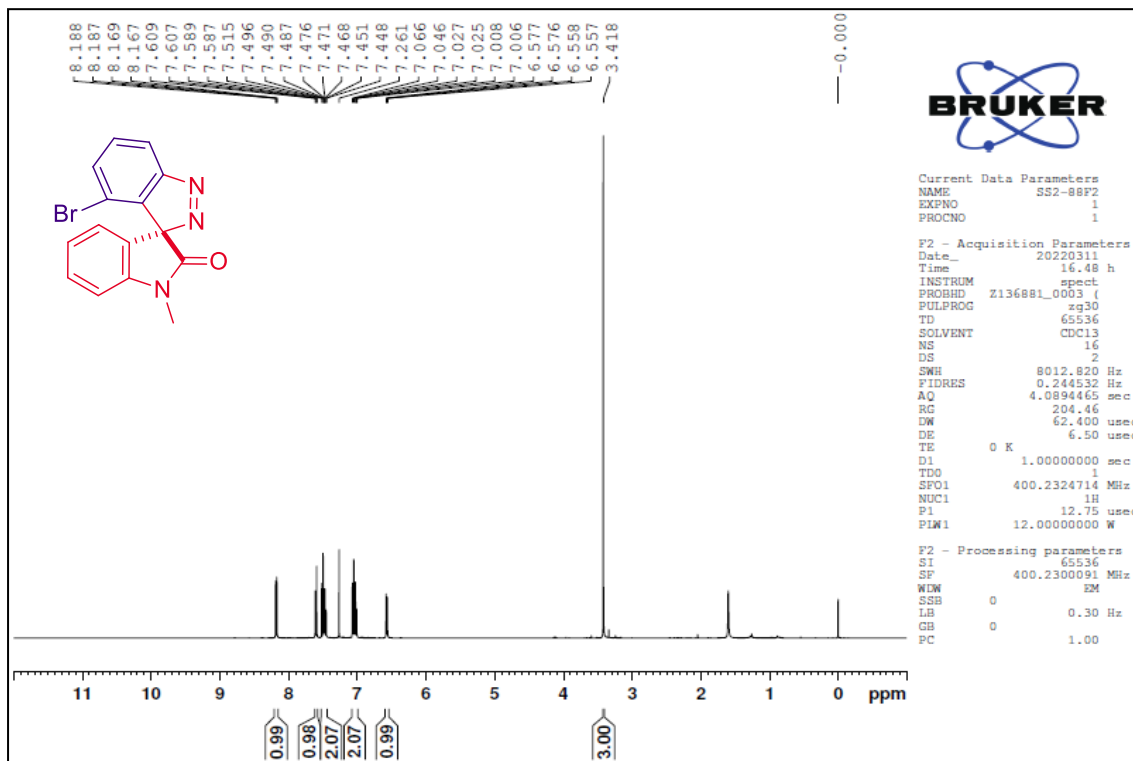

Figure 37. <sup>1</sup>H NMR spectrum of compound 4b

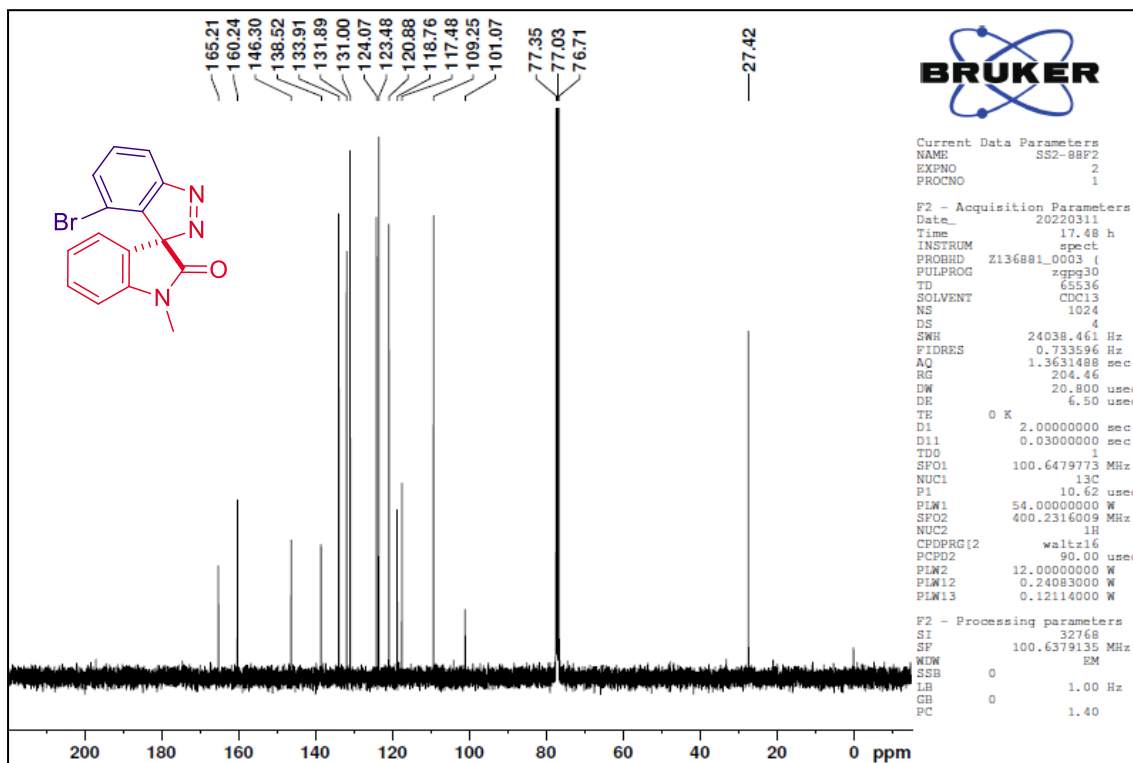

Figure 38. <sup>13</sup>C NMR spectrum of compound 4b

## Supporting Information

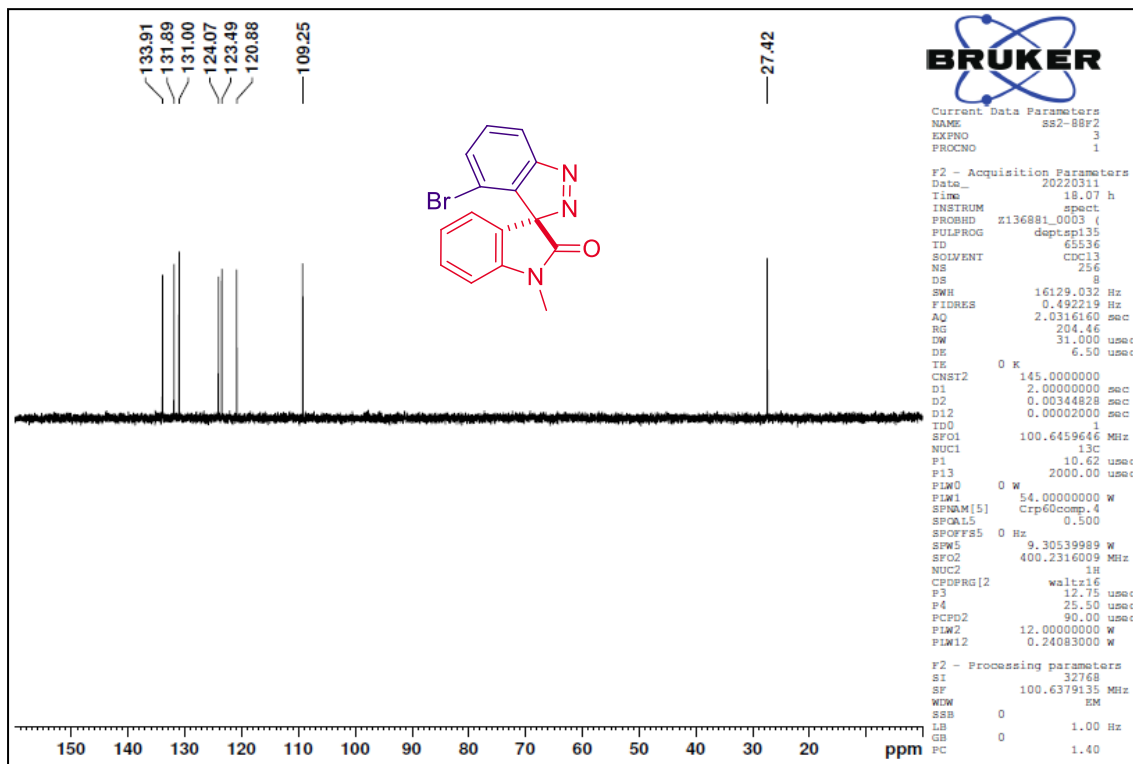

Figure 39. DEPT-135 NMR spectrum of compound **4b**

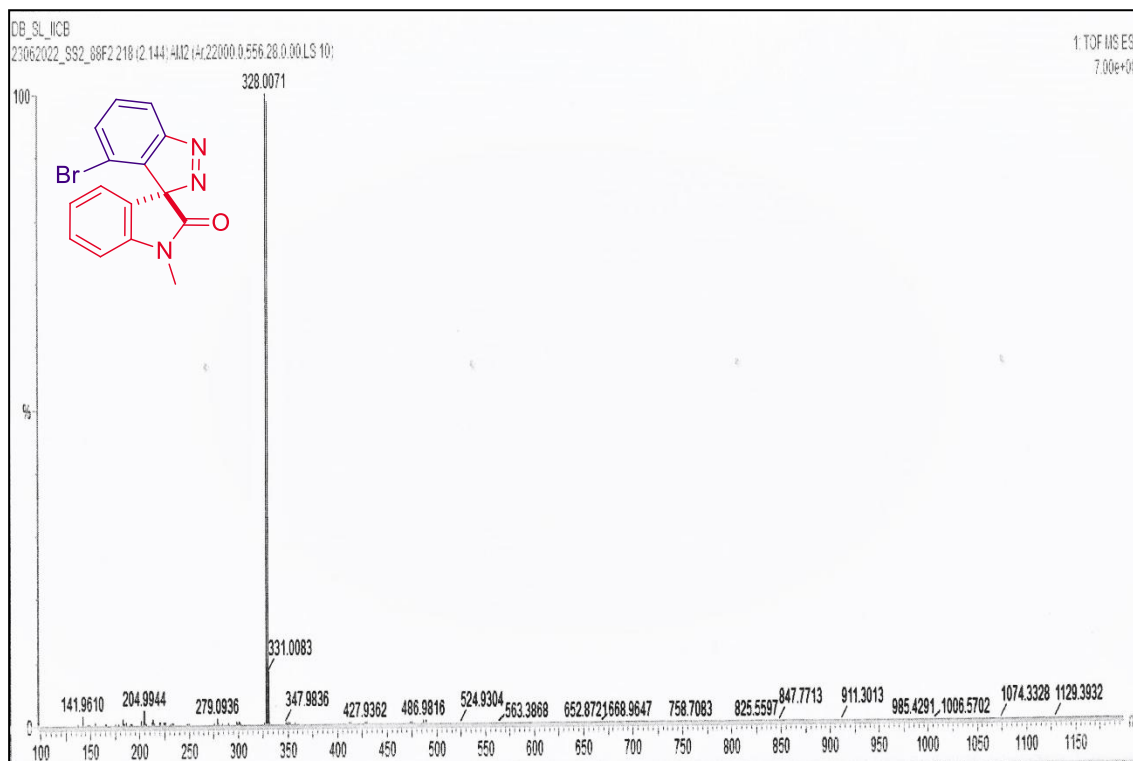

Figure 40. HRMS spectrum of compound **4b**

## Supporting Information

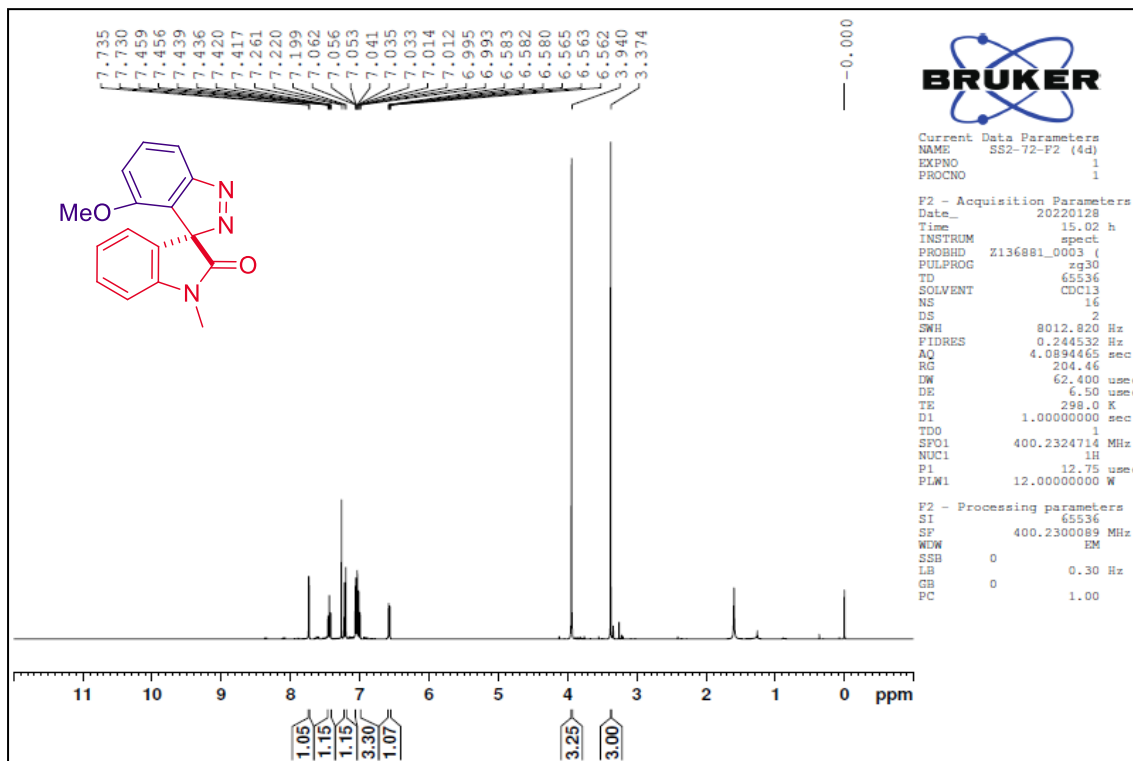

Figure 41. <sup>1</sup>H NMR spectrum of compound 4c

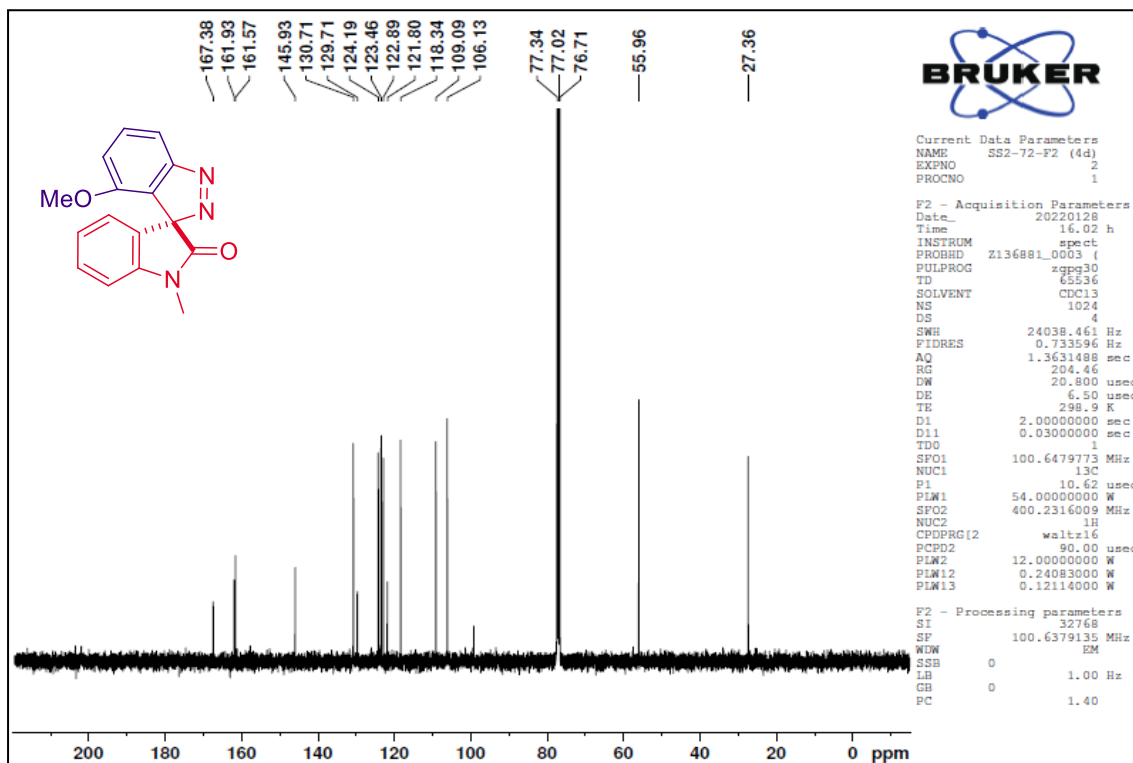

Figure 42. <sup>13</sup>C NMR spectrum of compound 4c

## Supporting Information

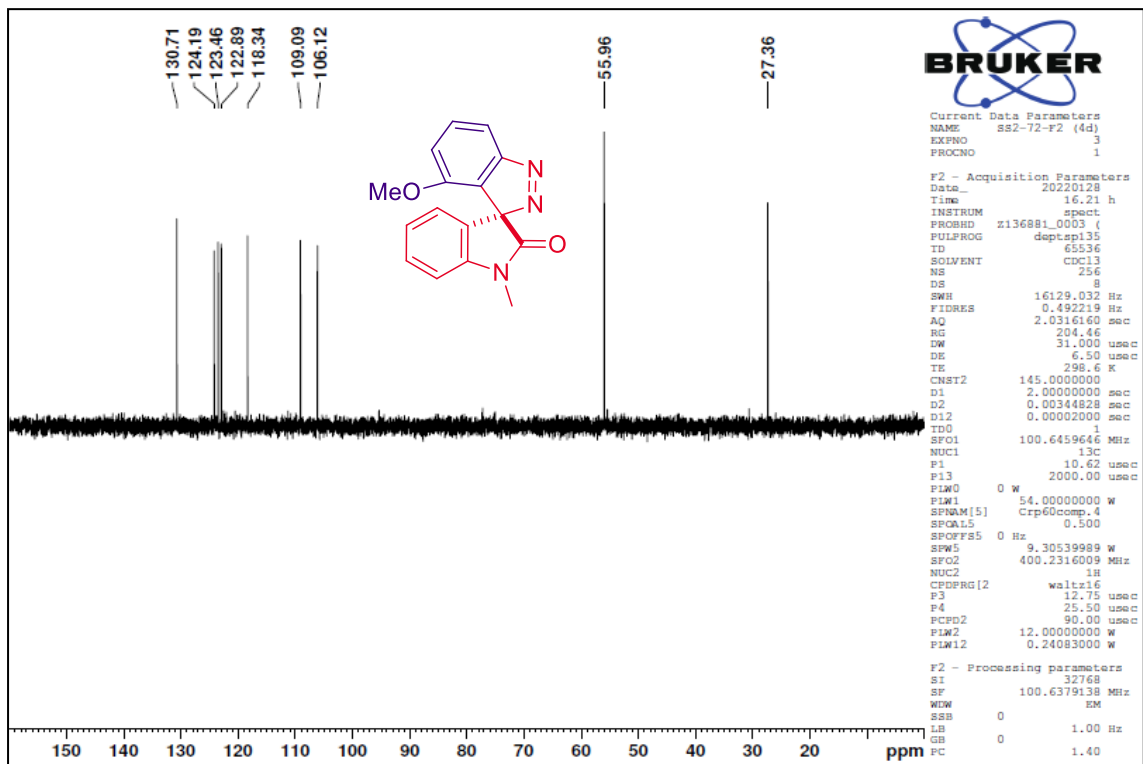

**Figure 43.**DEPT135 NMR spectrum of compound **4c**

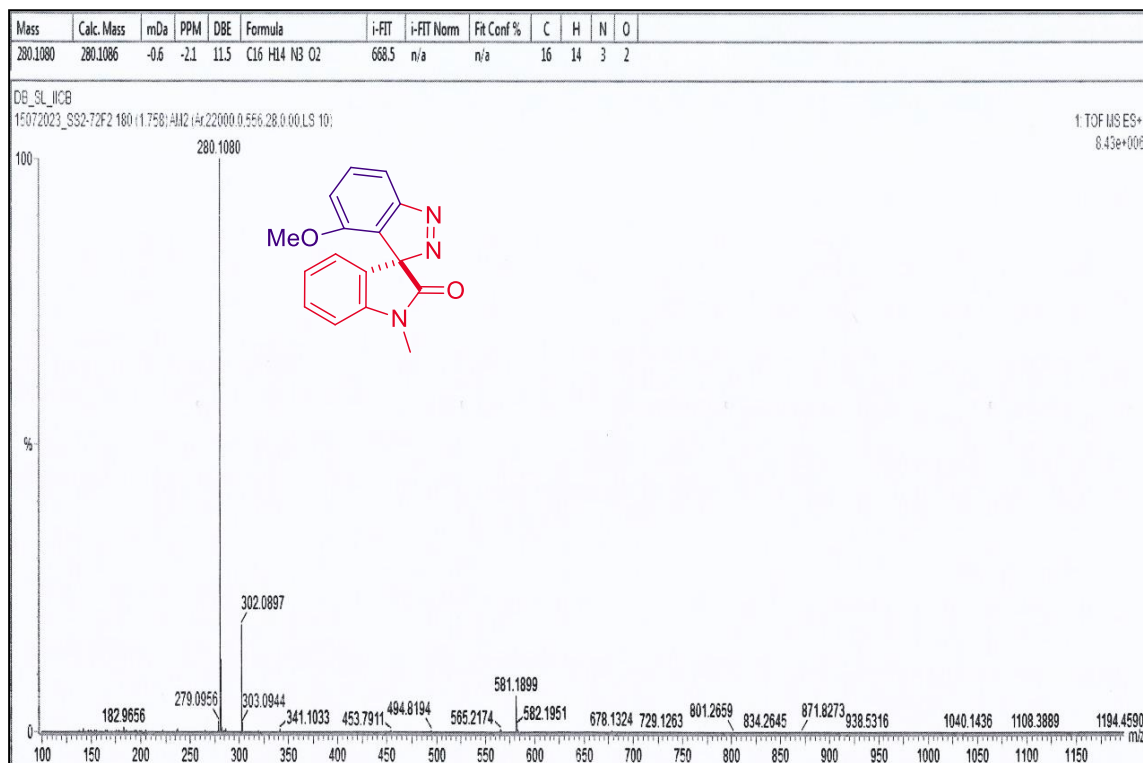

**Figure 44.**HRMS spectrum of compound **4c**



# Supporting Information

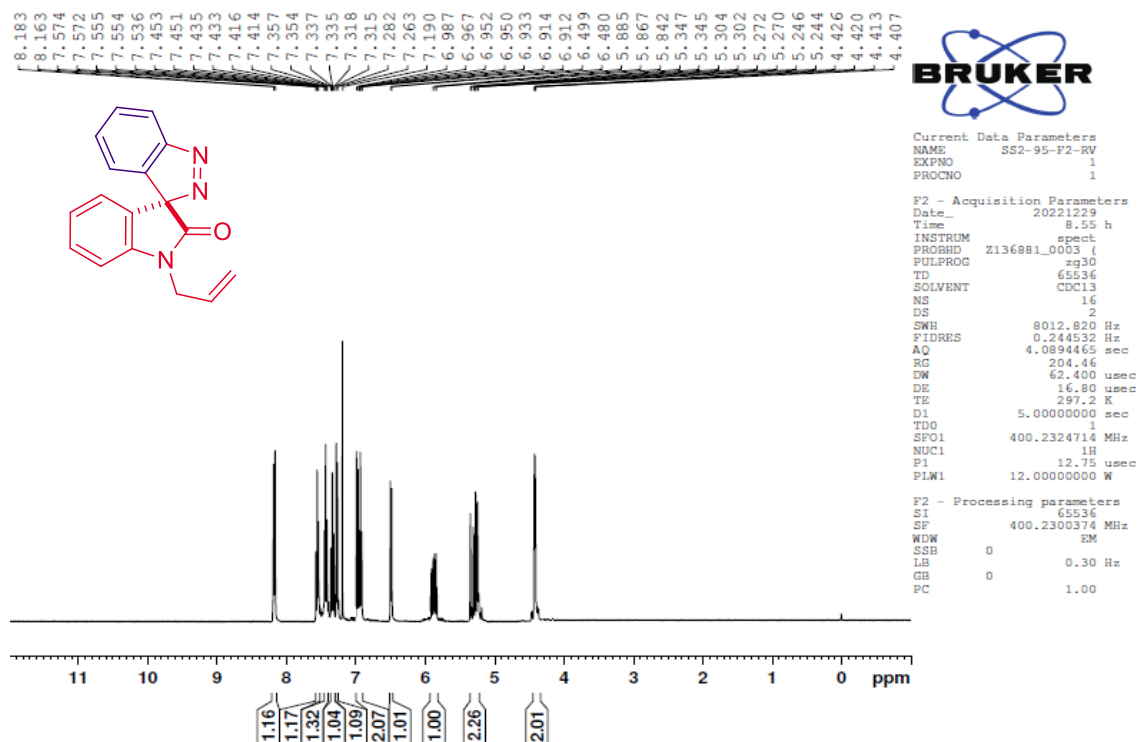

**Figure 45.** <sup>1</sup>H NMR spectrum of compound 4d

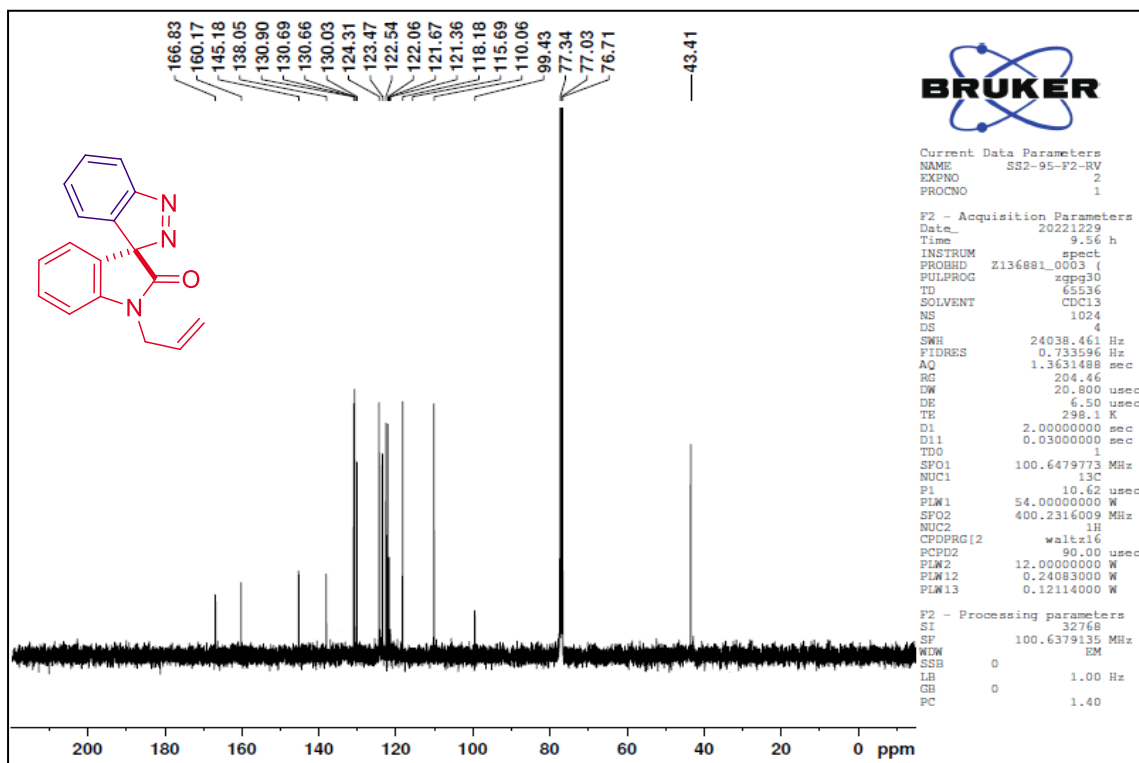

**Figure 46.** <sup>13</sup>C NMR spectrum of compound 4d

# Supporting Information

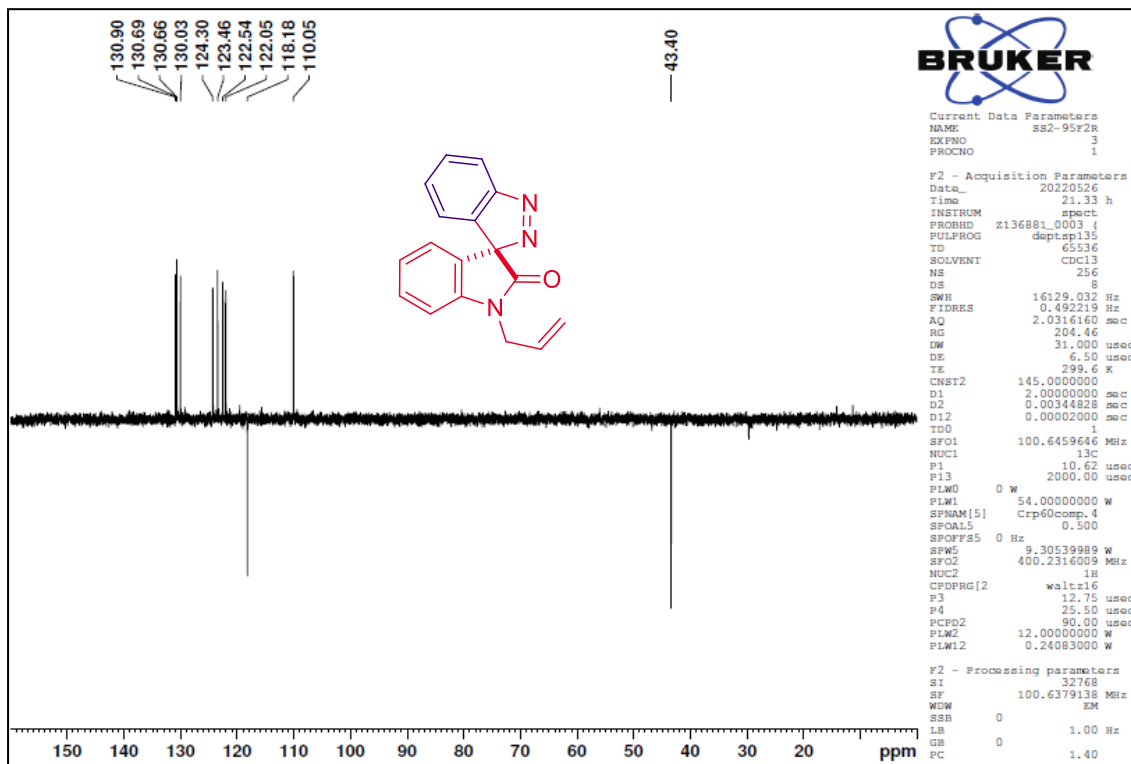

Figure 47. DEPT135 NMR spectrum of compound 4d

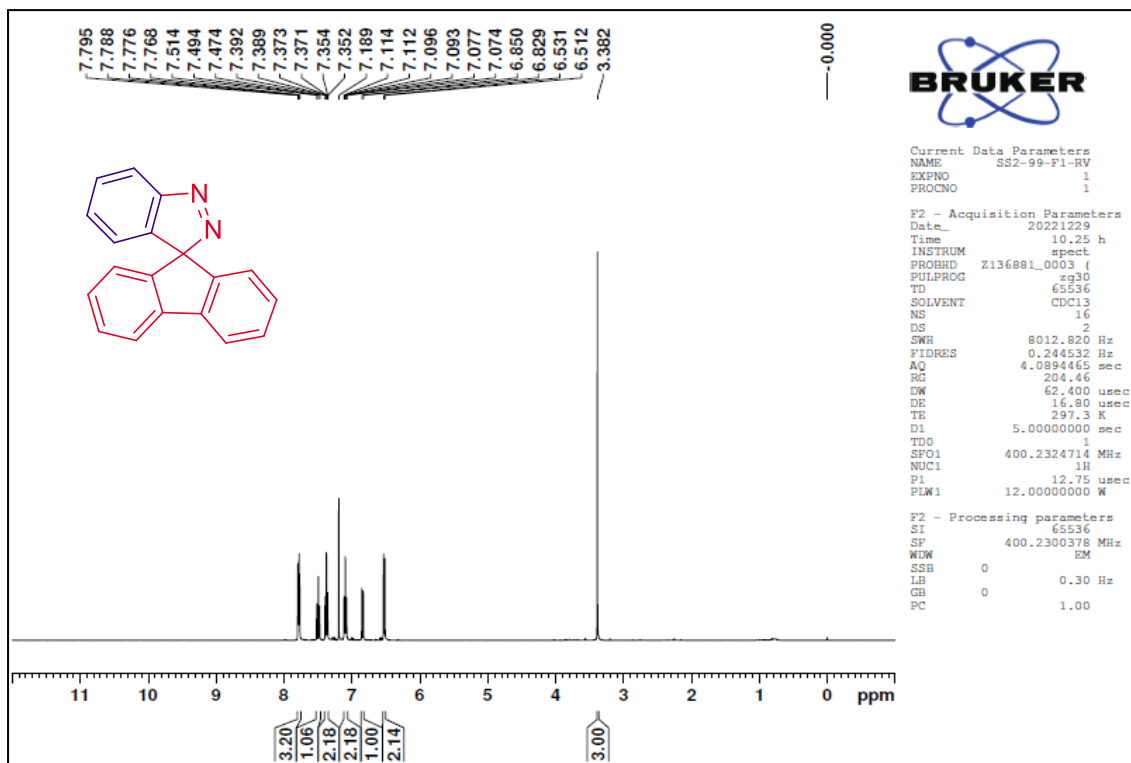

Figure 49. <sup>1</sup>H NMR spectrum of compound 4e

## Supporting Information

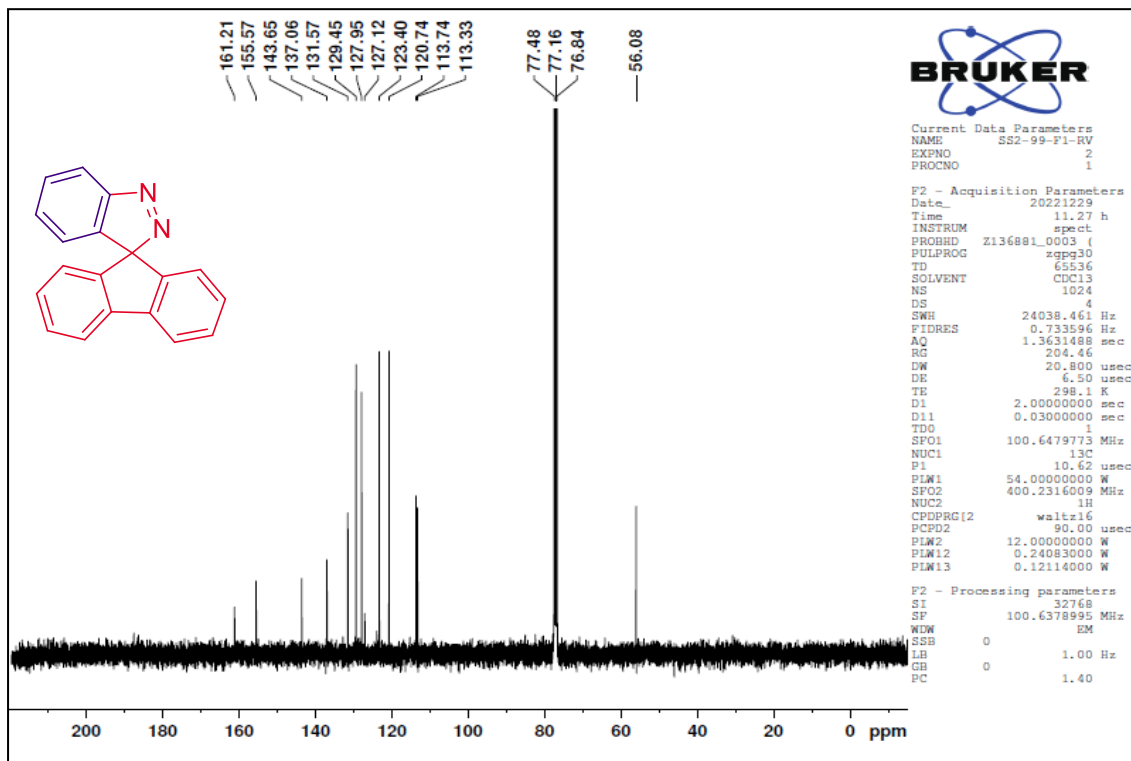

Figure 50. <sup>13</sup>C NMR spectrum of compound 4e

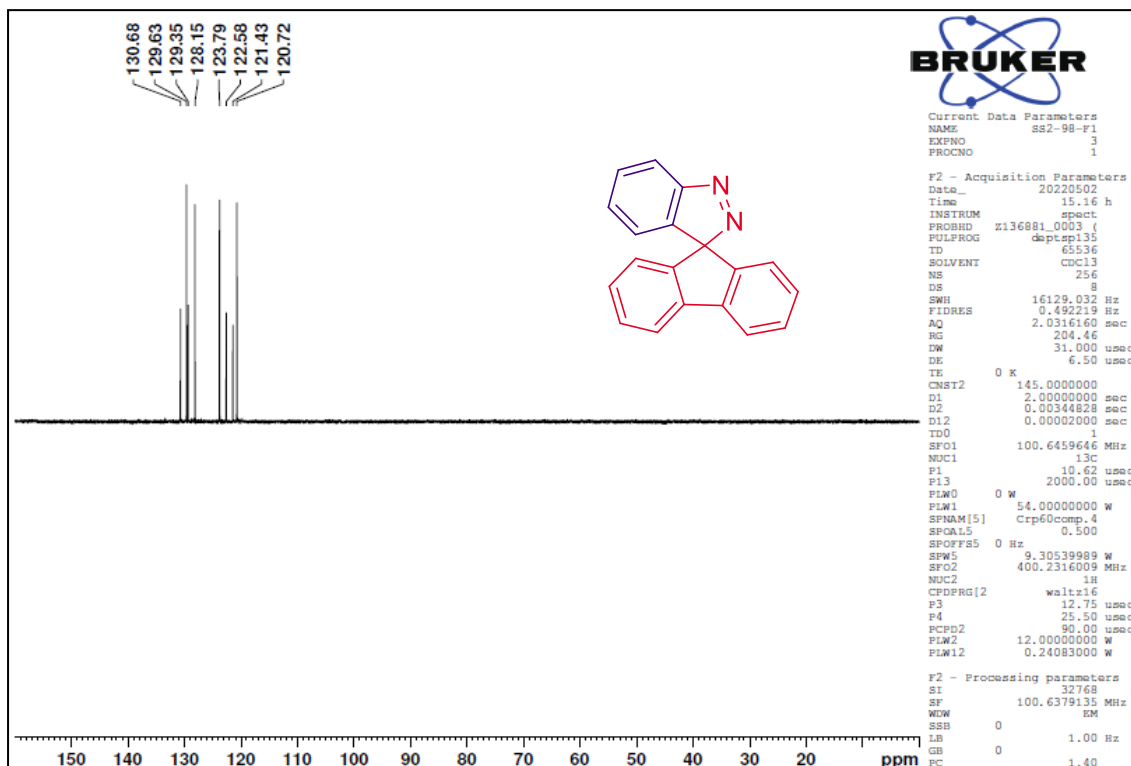

Figure 51. DEPT135 NMR spectrum of compound 4e

## Supporting Information

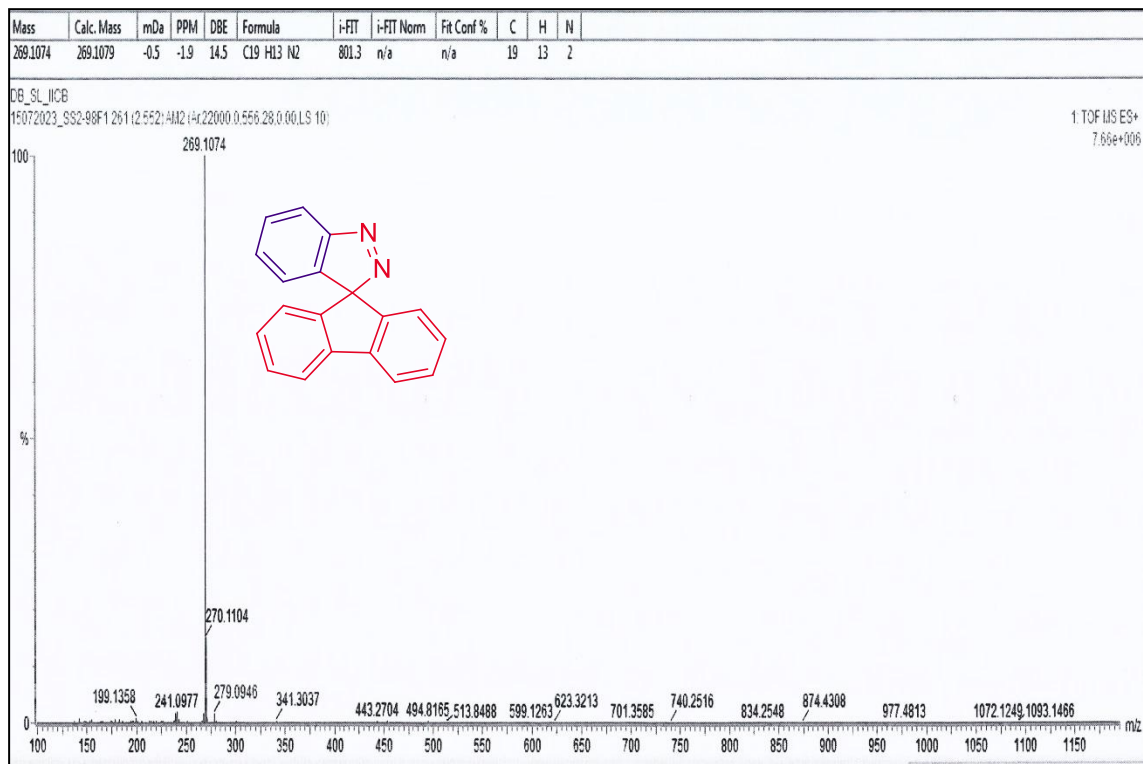

**Figure 52.** HRMS spectrum of compound **4e**

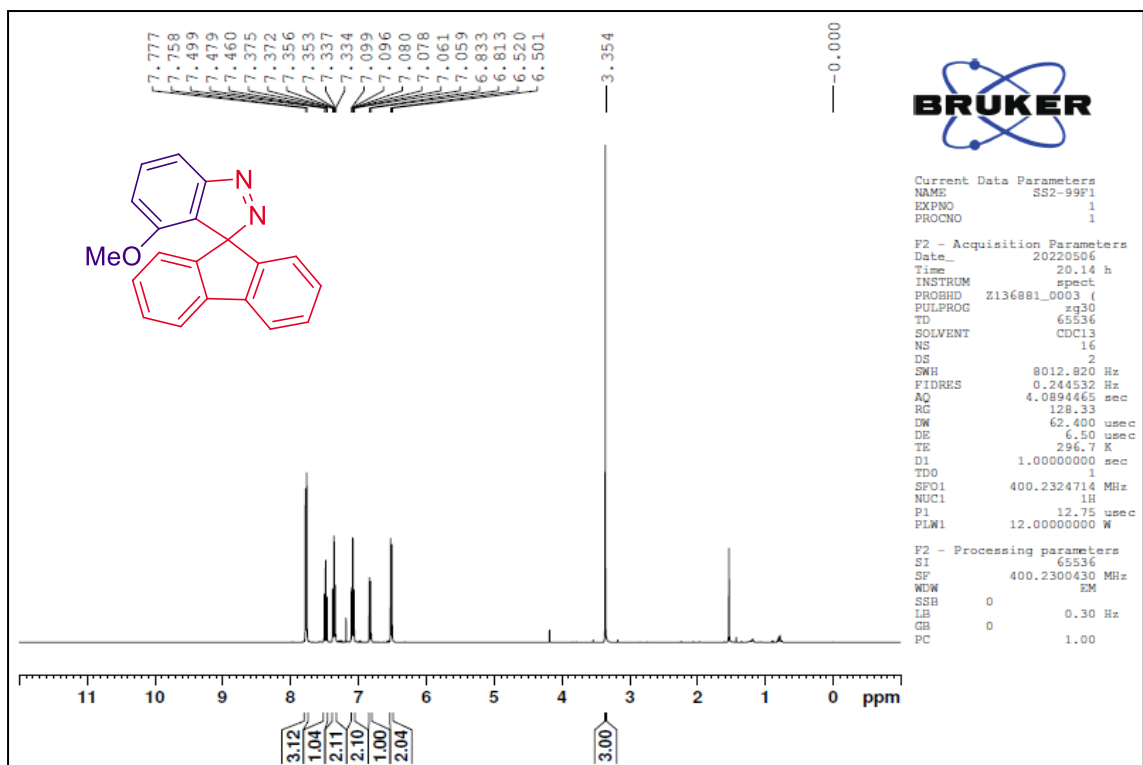

**Figure 53.** <sup>1</sup>H NMR spectrum of compound **4f**

## Supporting Information

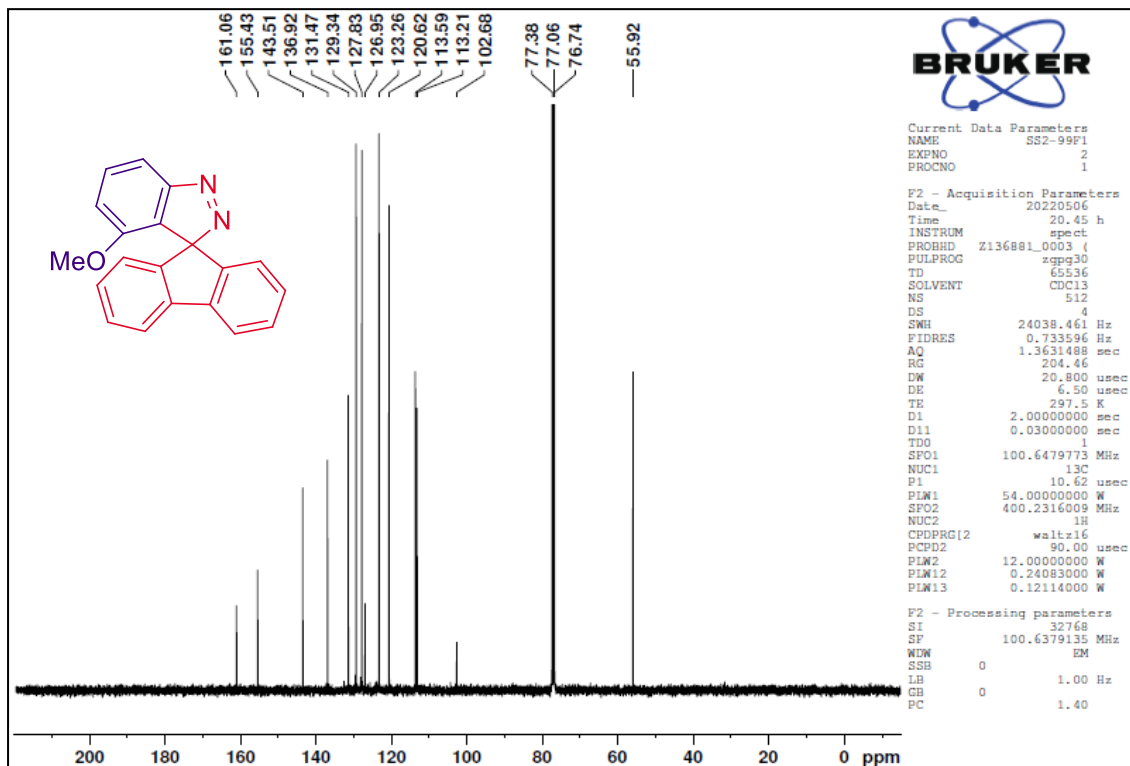

Figure 54. <sup>13</sup>C NMR spectrum of compound 4f

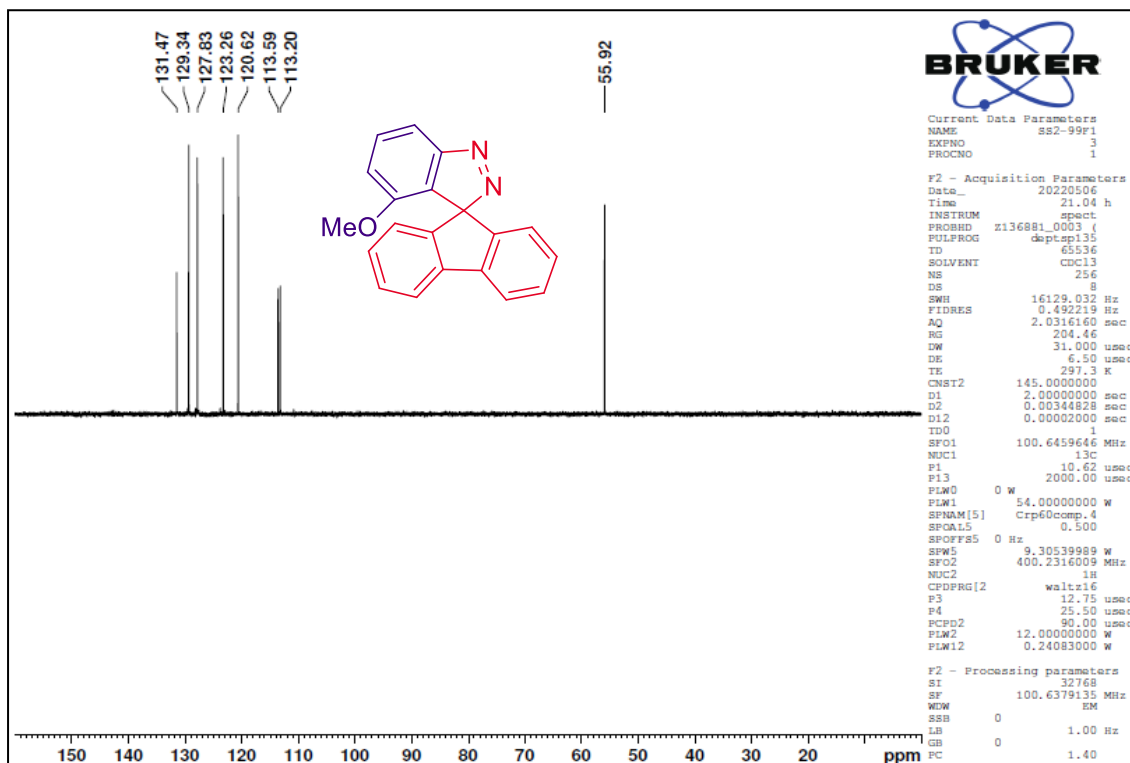

Figure 55. DEPT135 NMR spectrum of compound 4f

## Supporting Information

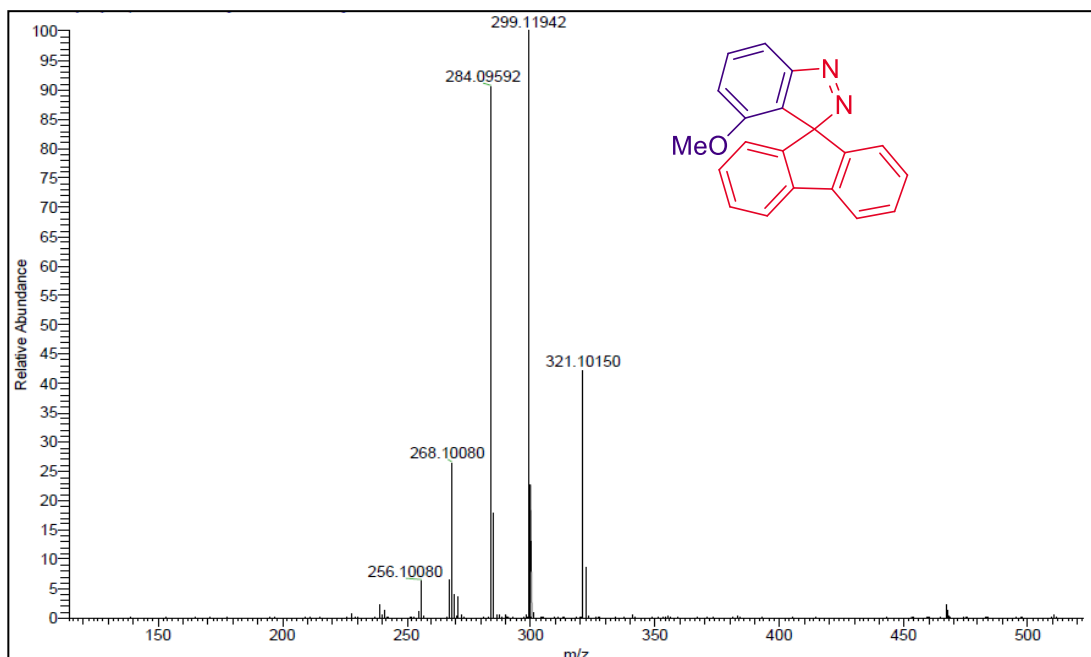

**Figure 56.**HRMS spectrum of compound 4f

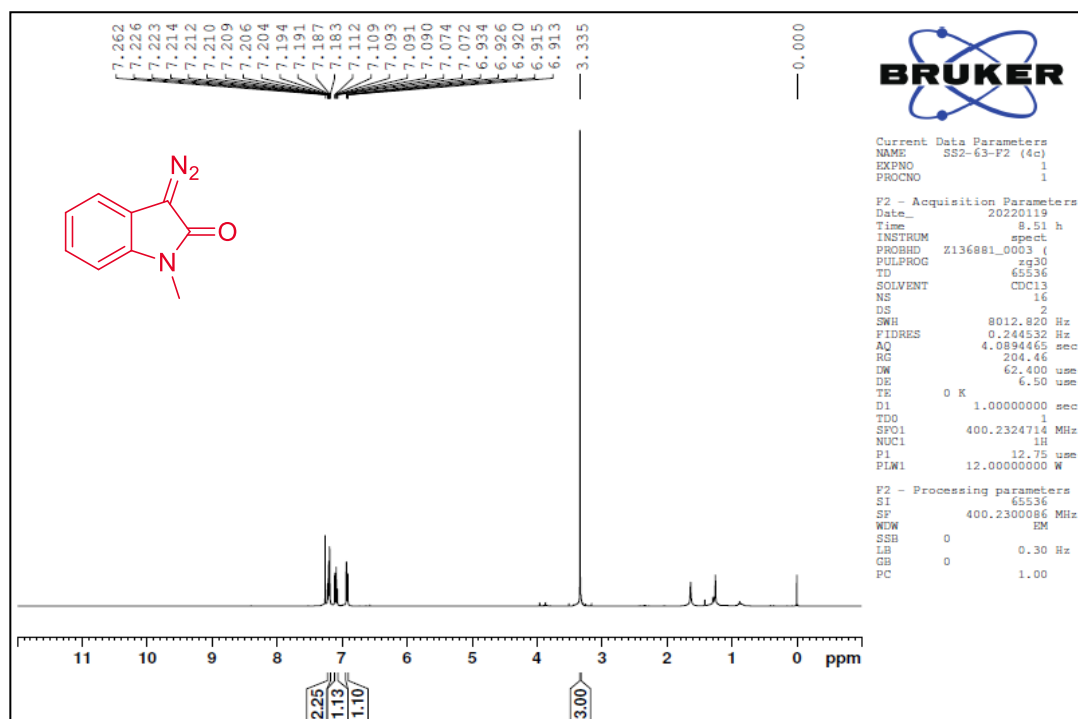

**Figure 57.**<sup>1</sup>H NMR spectrum of compound 4g

## Supporting Information

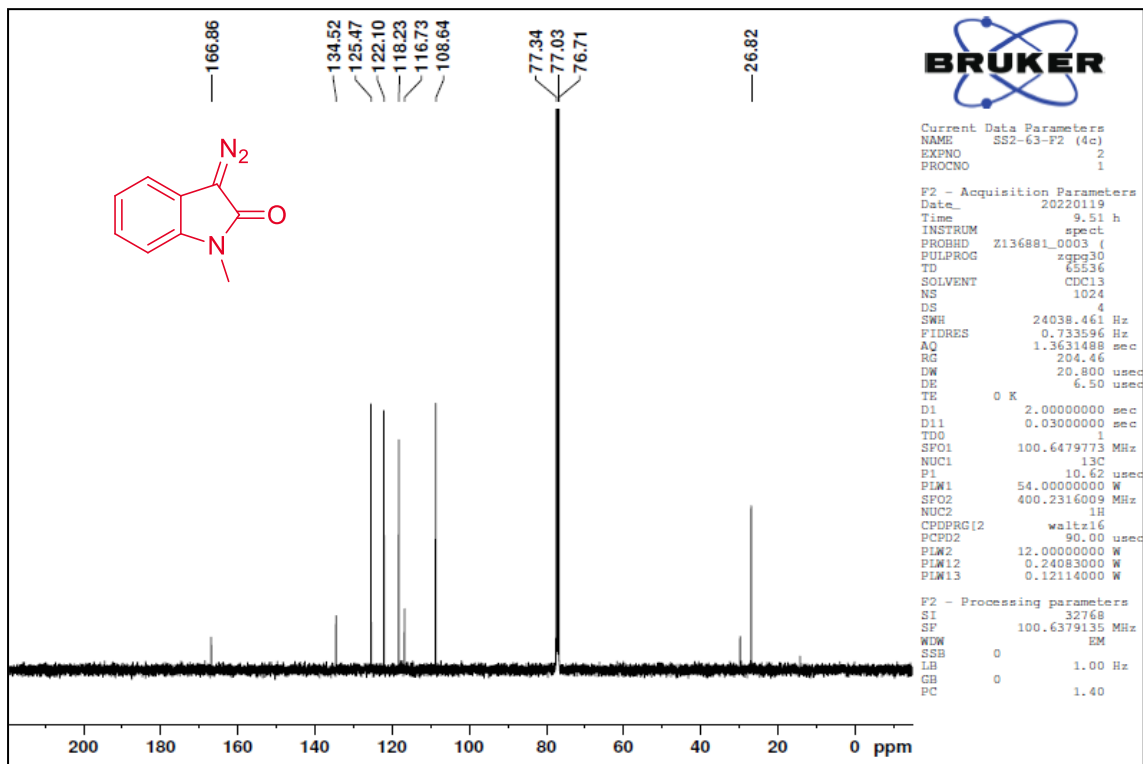

Figure 58. <sup>13</sup>C NMR spectrum of compound 4g

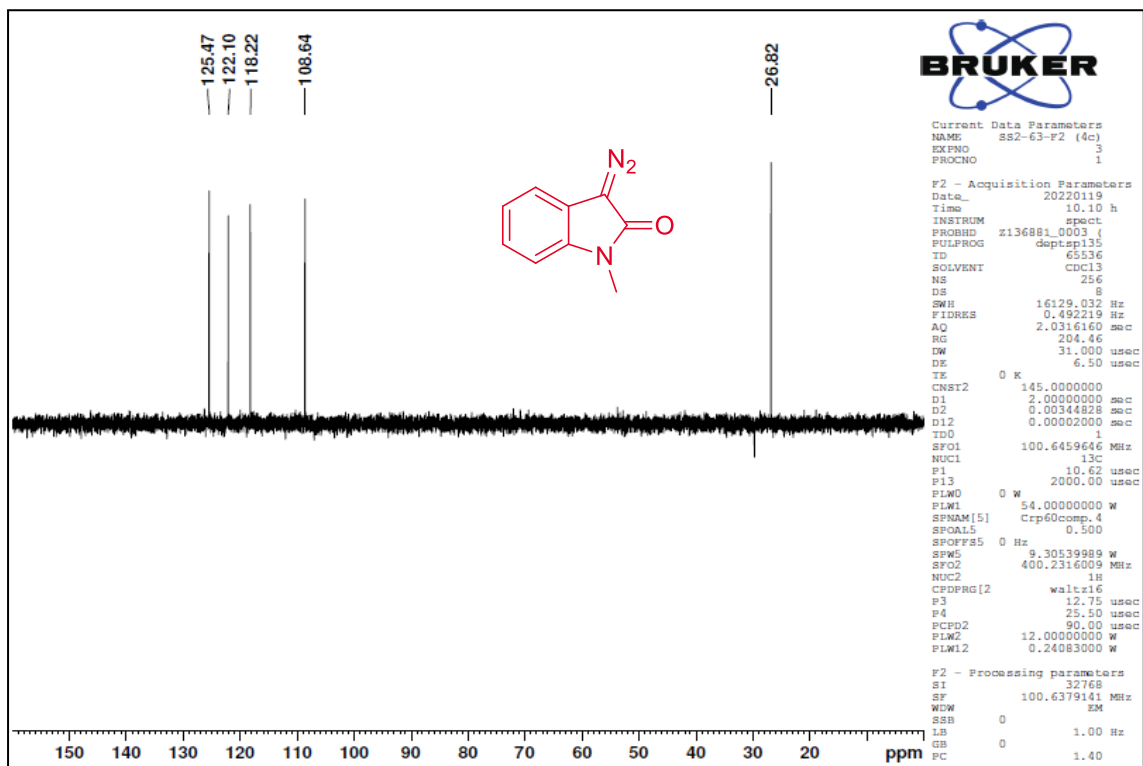

Figure 59. DEPT135 NMR spectrum of compound 4g

# Supporting Information

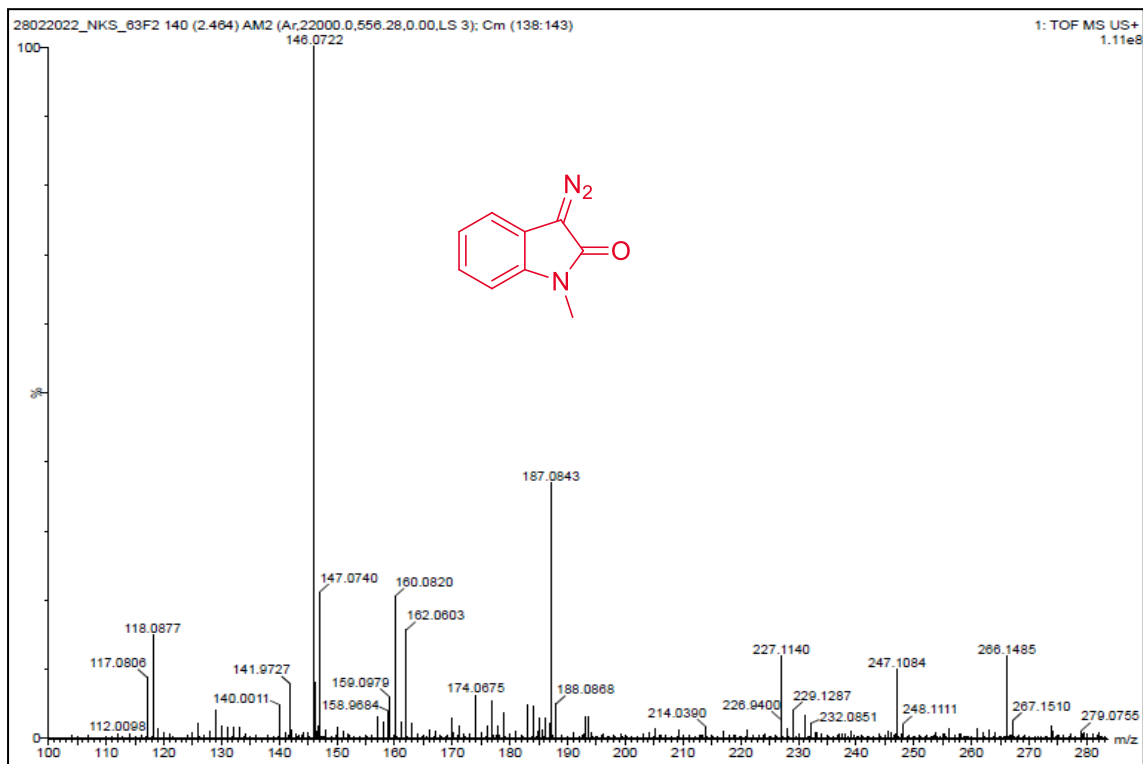

Figure 60. HRMS spectrum of compound 4g

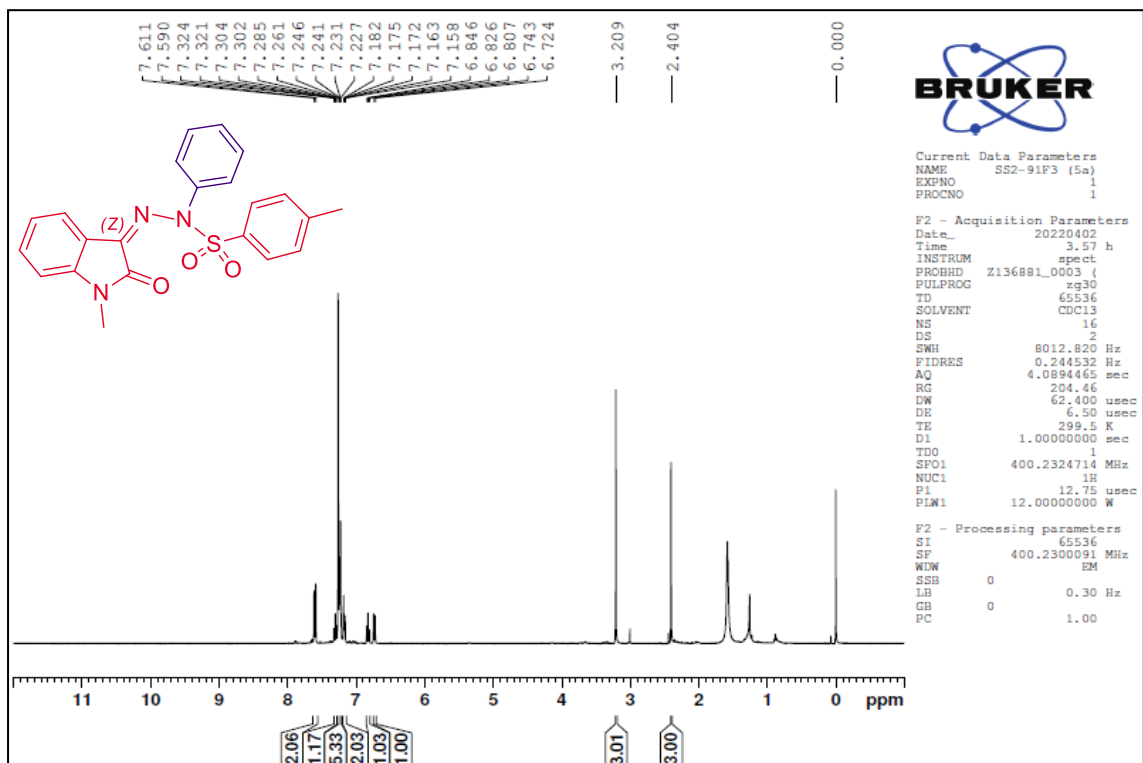

Figure 61. <sup>1</sup>H NMR spectrum of compound 5a



## Supporting Information

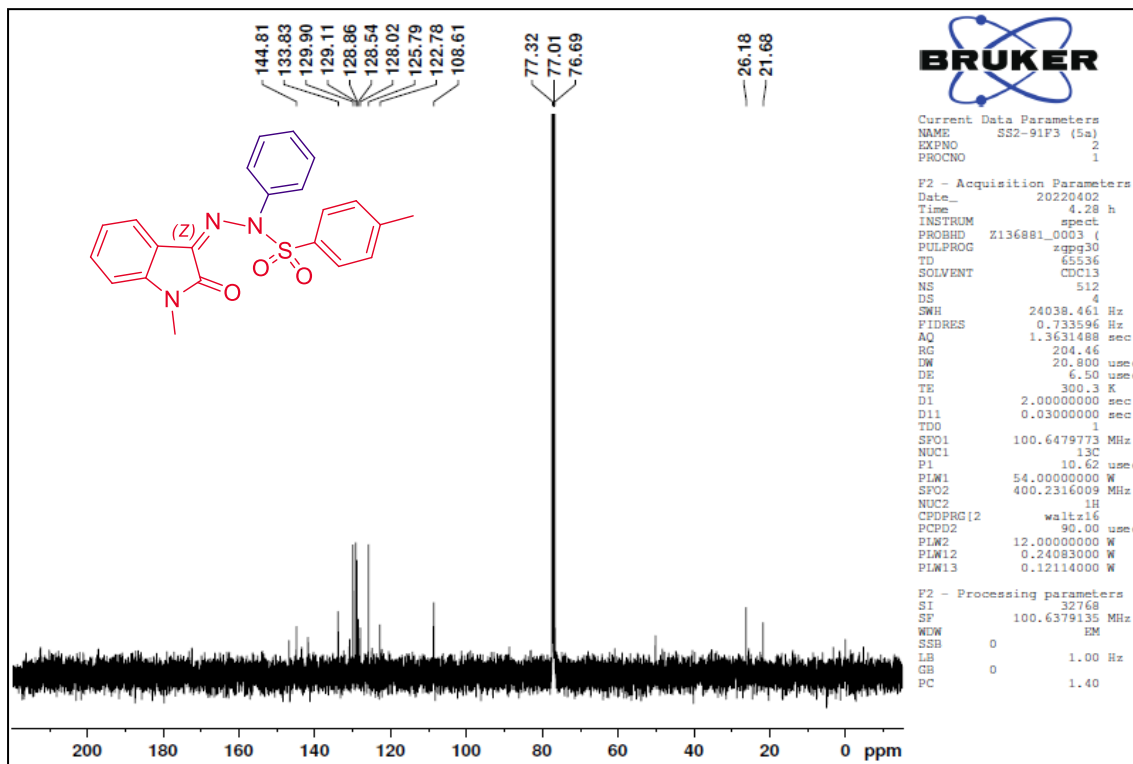

Figure 62. <sup>13</sup>C NMR spectrum of compound 5a

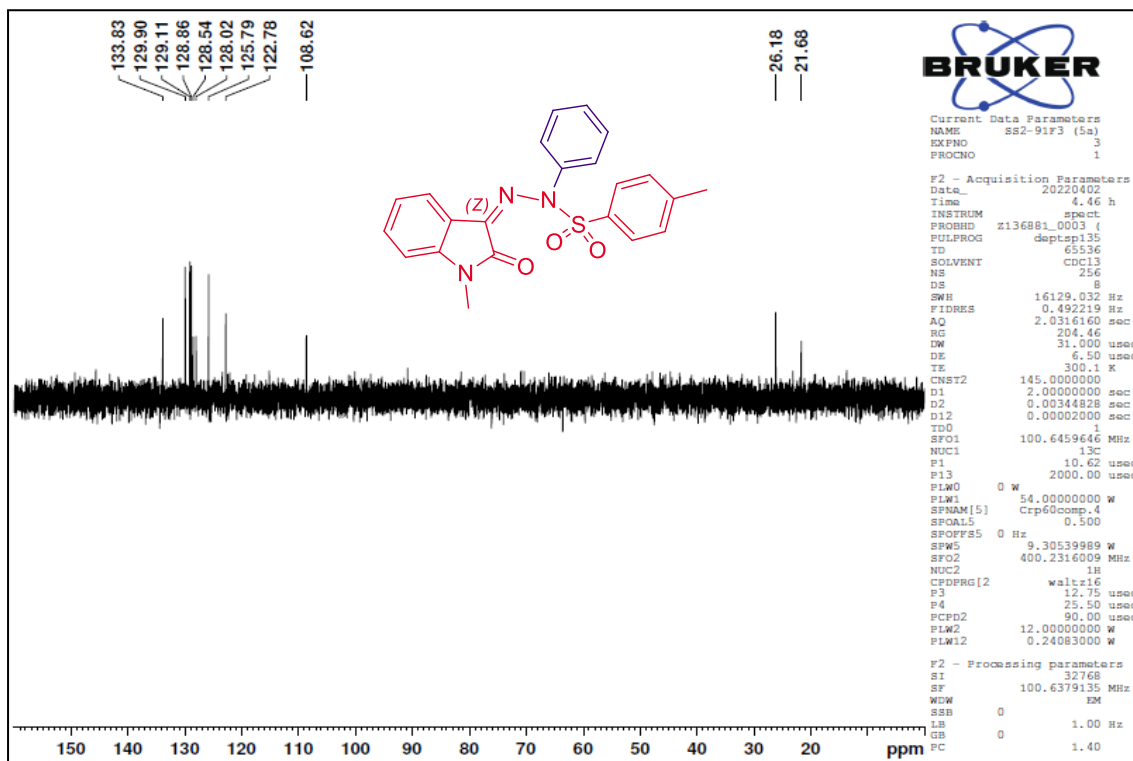

Figure 63. DEPT135 NMR spectrum of compound 5a

## Supporting Information

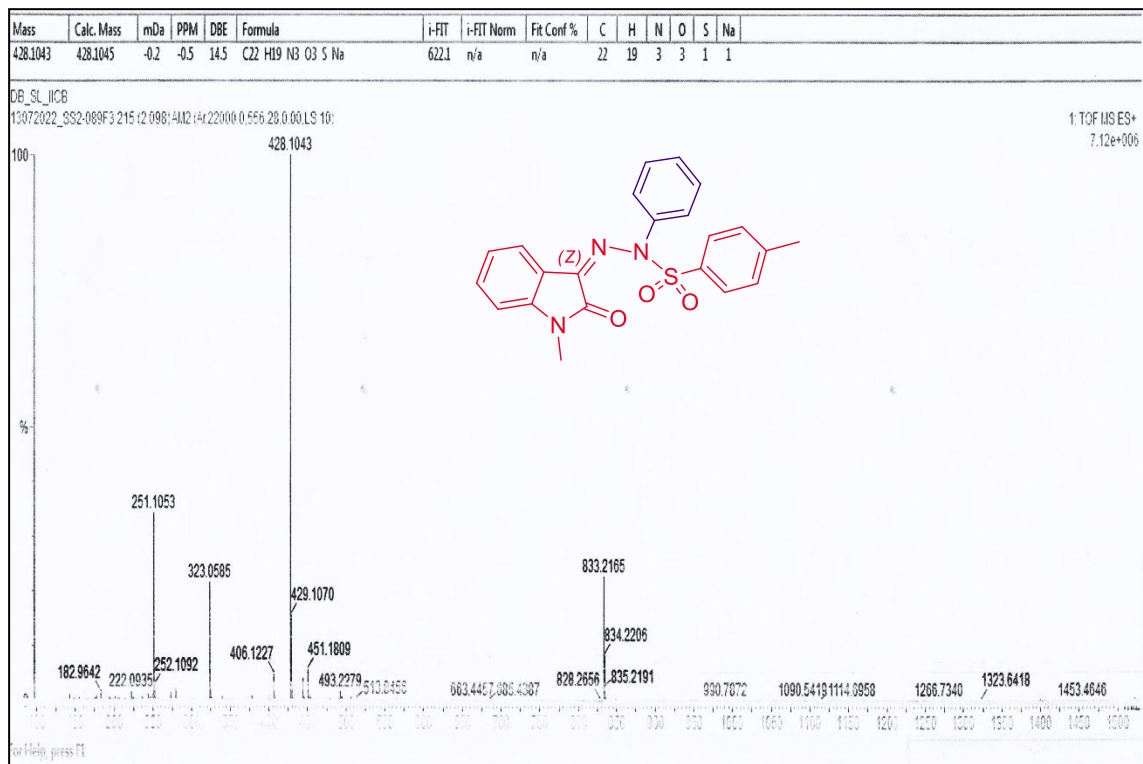

Figure 64. HRMS spectrum of compound 5a

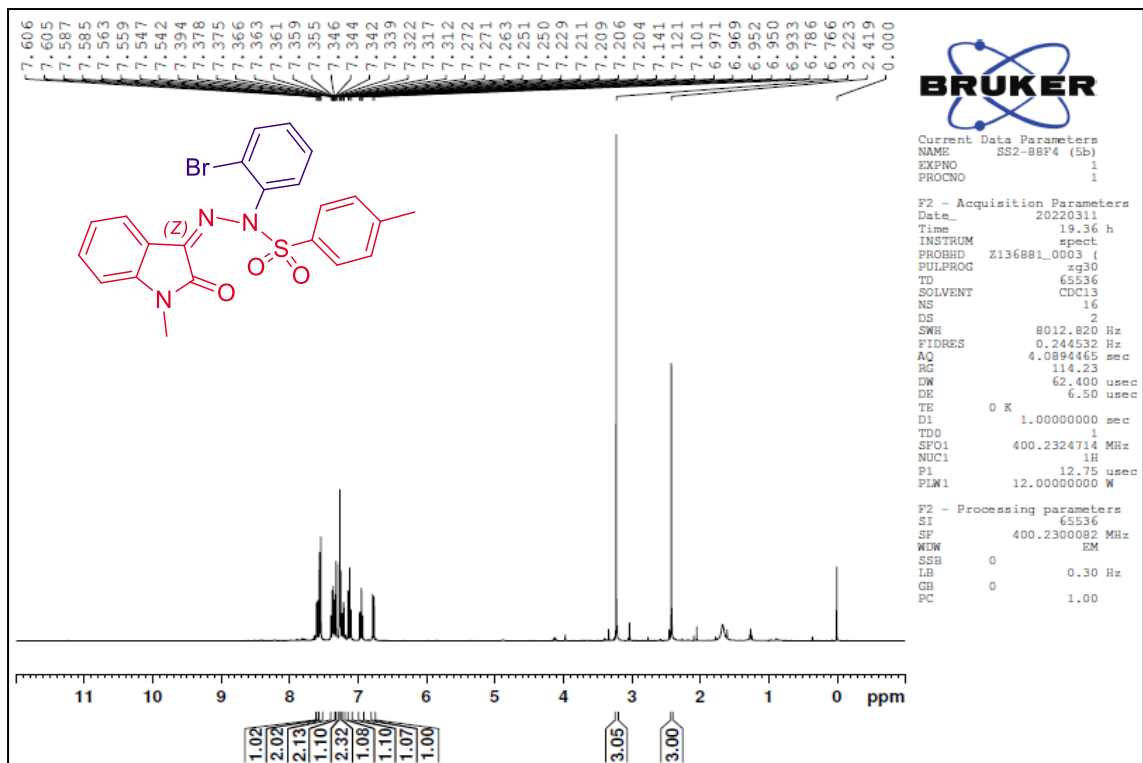

Figure 65. <sup>1</sup>H NMR spectrum of compound 5b

# Supporting Information

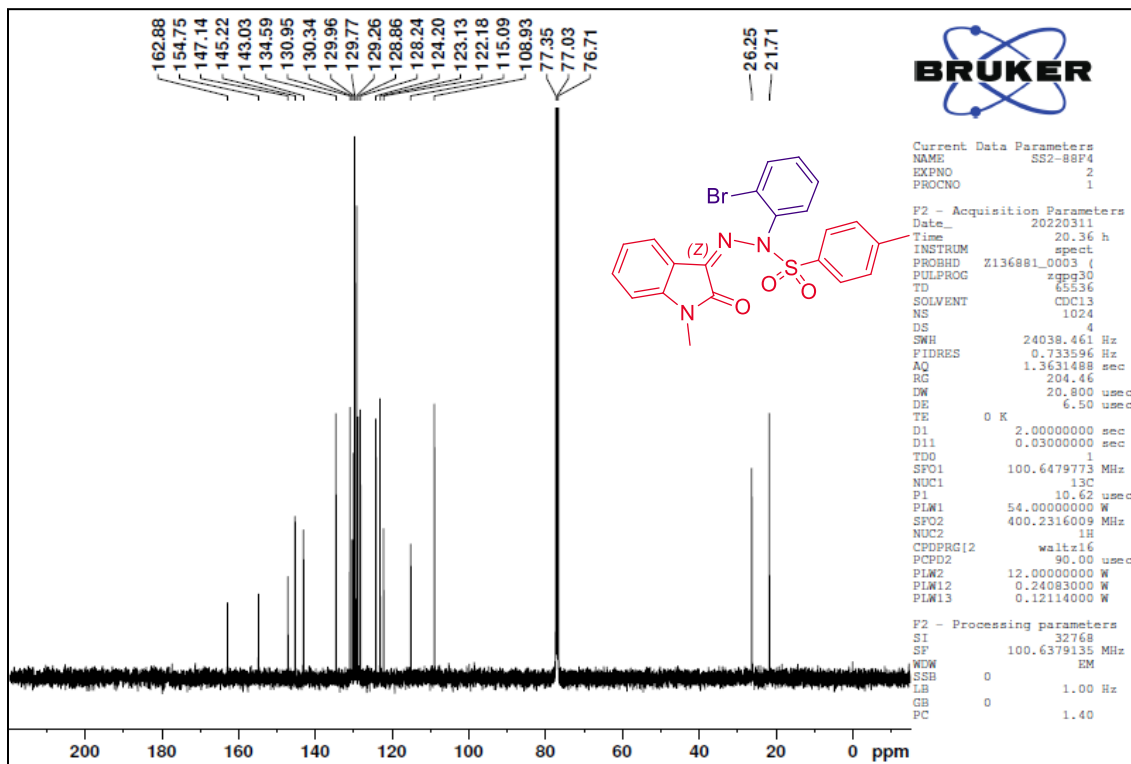

Figure 66. <sup>13</sup>C NMR spectrum of compound 5b

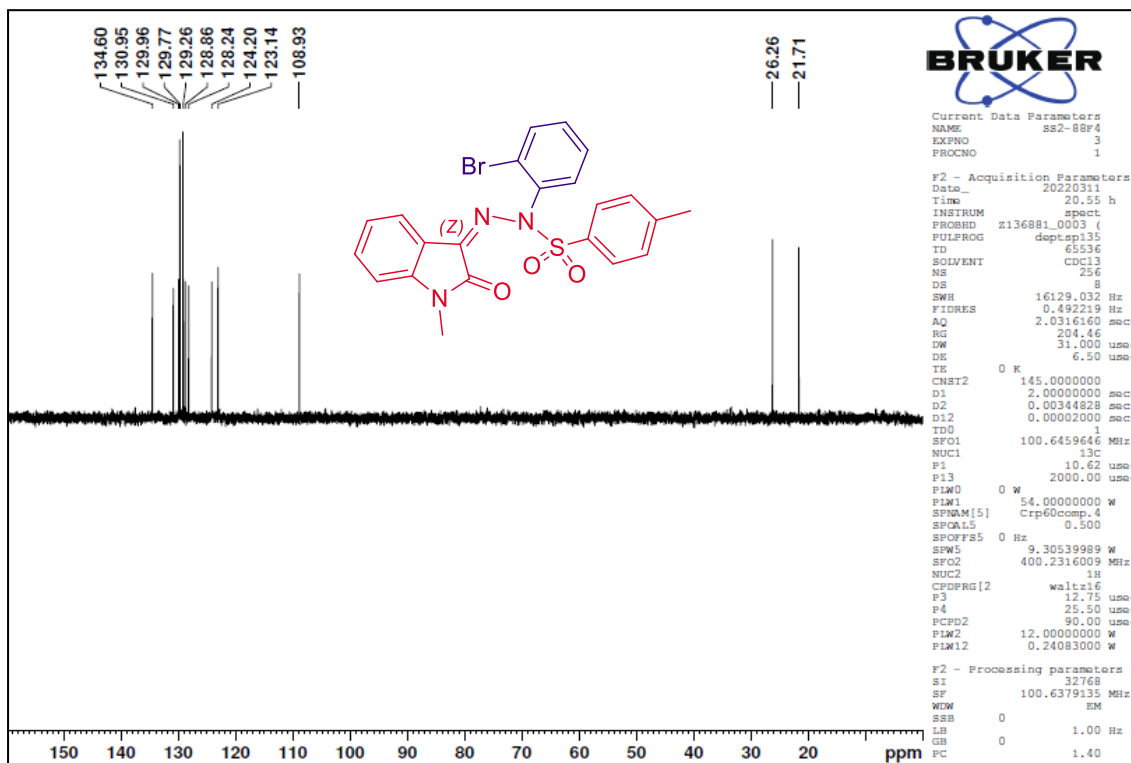

Figure 67. DEPT135 NMR spectrum of compound 5b

# Supporting Information

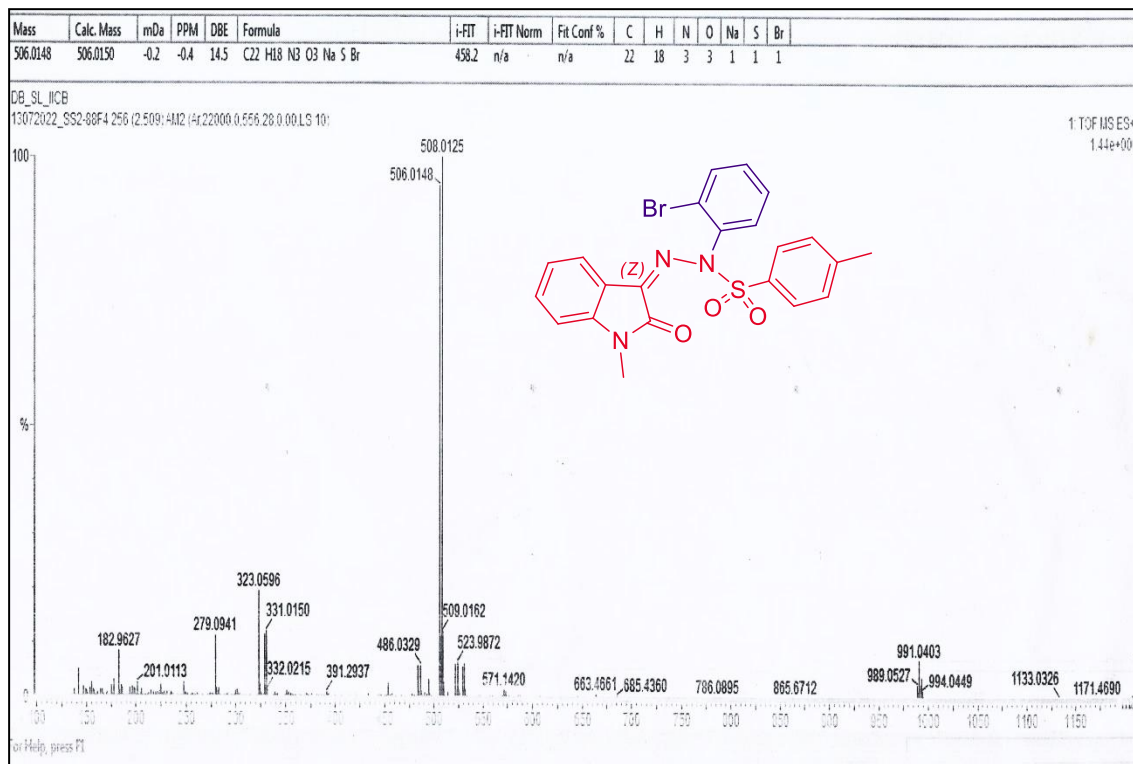

Figure 68. HRMS spectrum of compound 5b

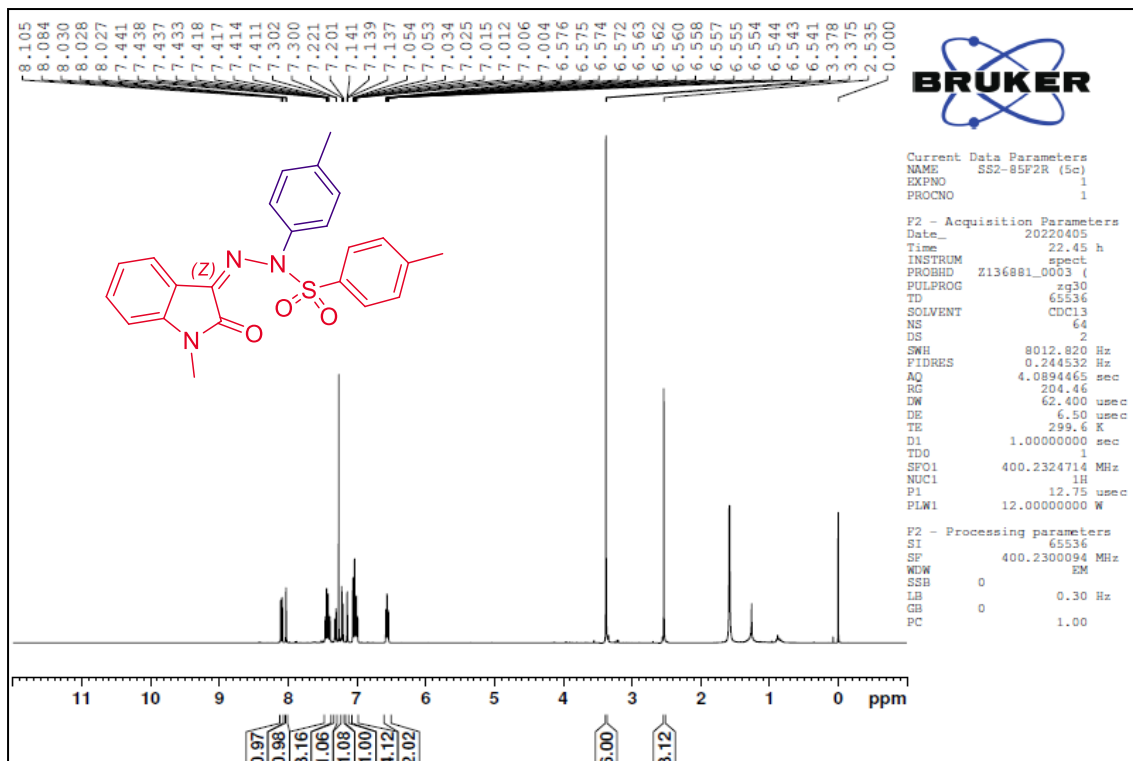

Figure 69. <sup>1</sup>H NMR spectrum of compound 5c

## Supporting Information

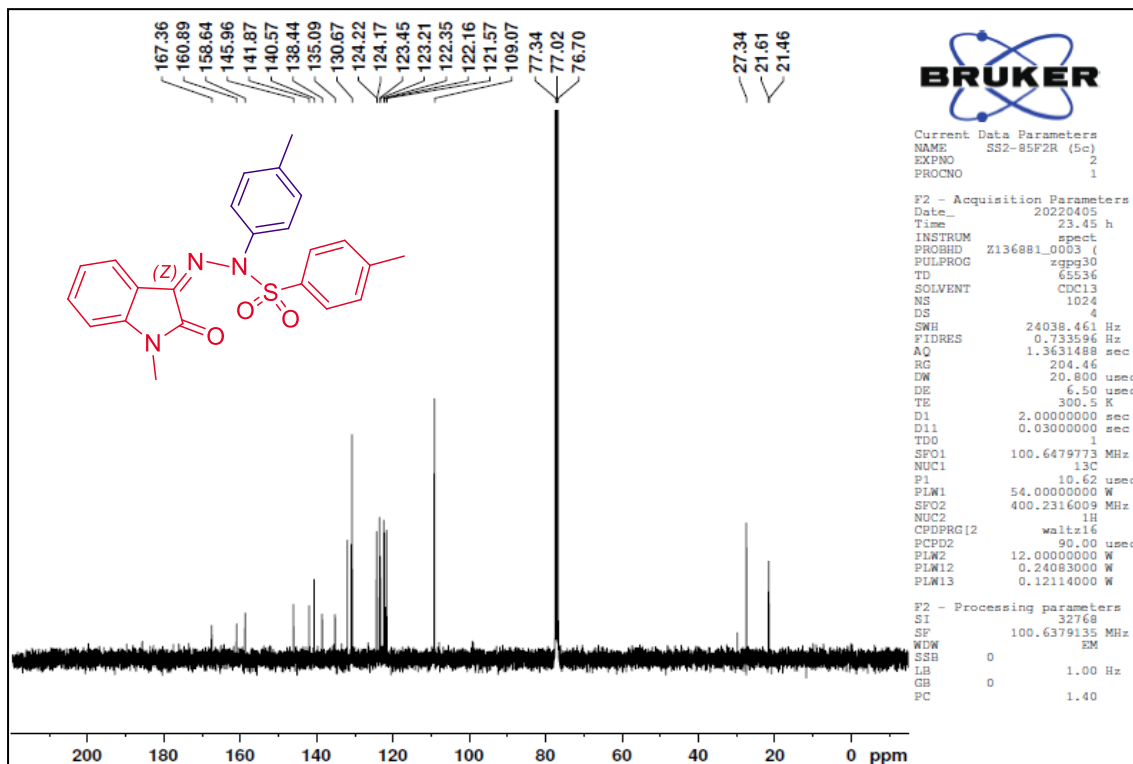

Figure 70. <sup>13</sup>C NMR spectrum of compound 5c

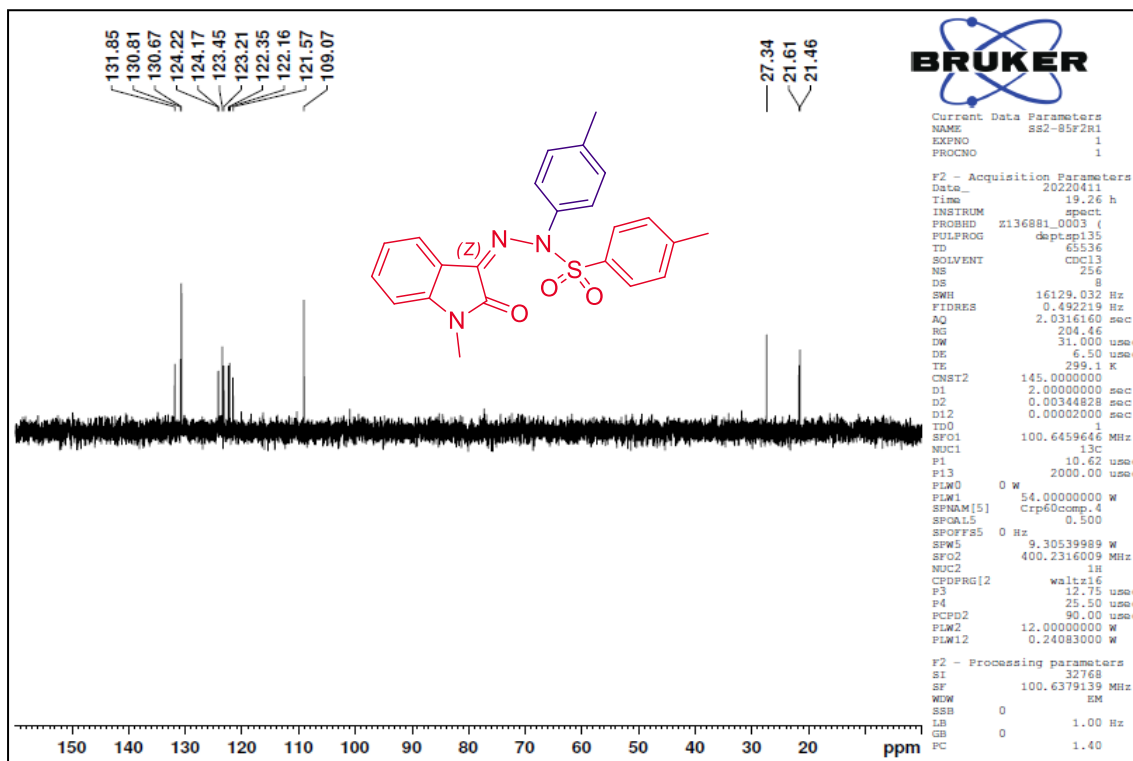

Figure 71. DEPT135 NMR spectrum of compound 5c

# Supporting Information

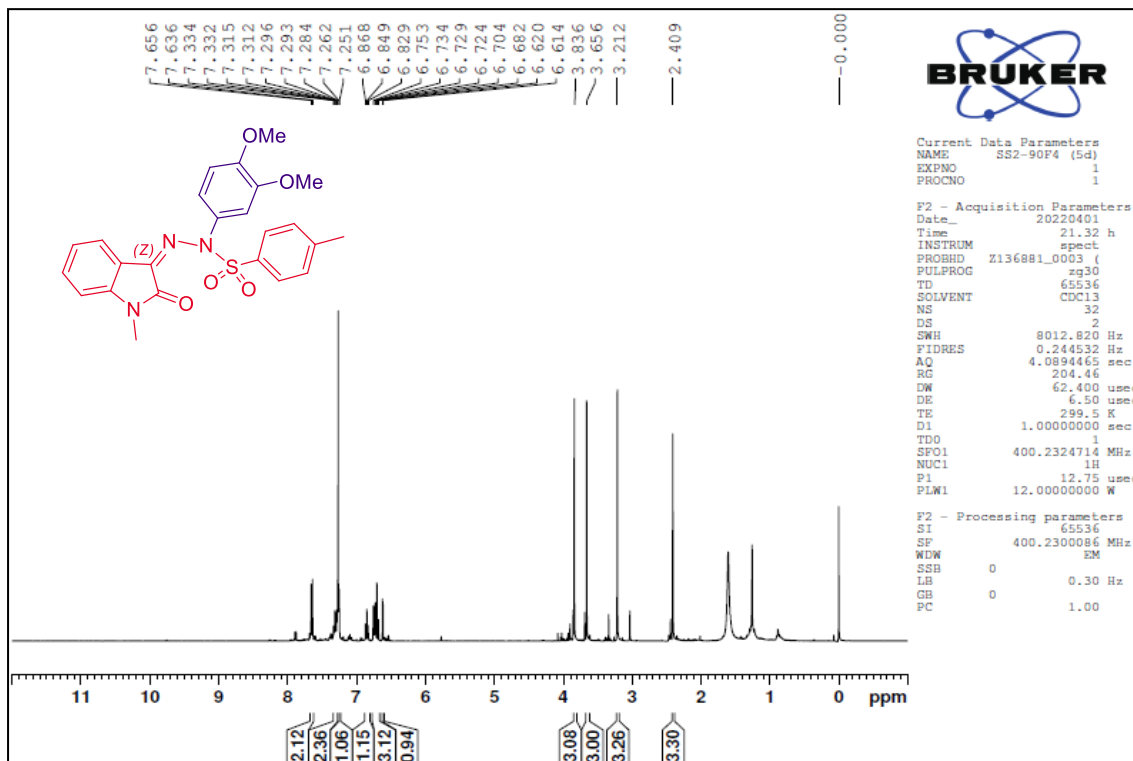

Figure 73. <sup>1</sup>H NMR spectrum of compound 5d

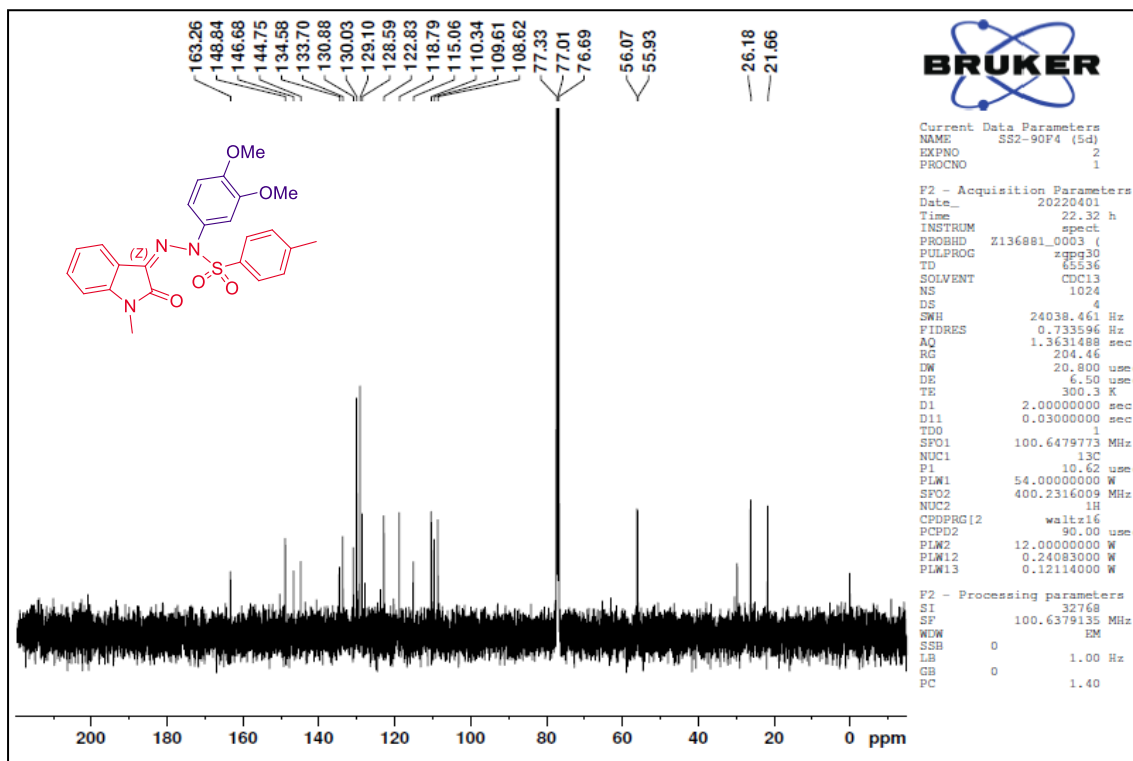

Figure 74. <sup>13</sup>C NMR spectrum of compound 5d

## Supporting Information

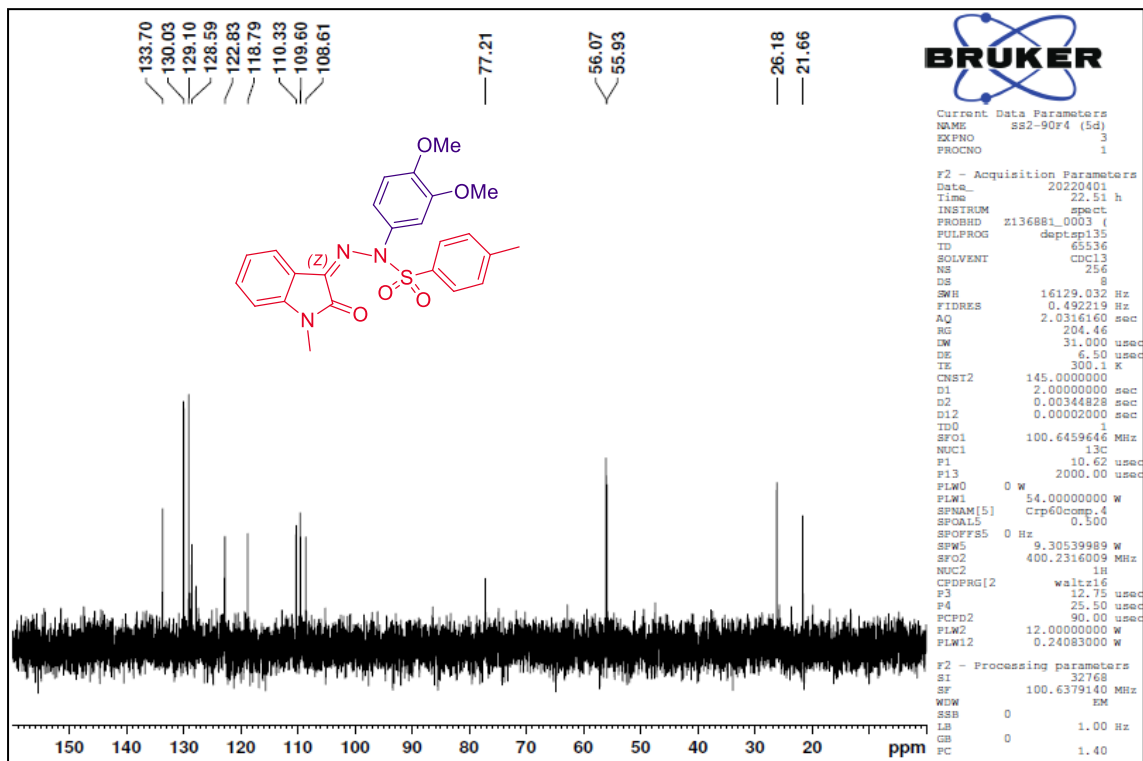

Figure 75. DEPT135 NMR spectrum of compound 5d

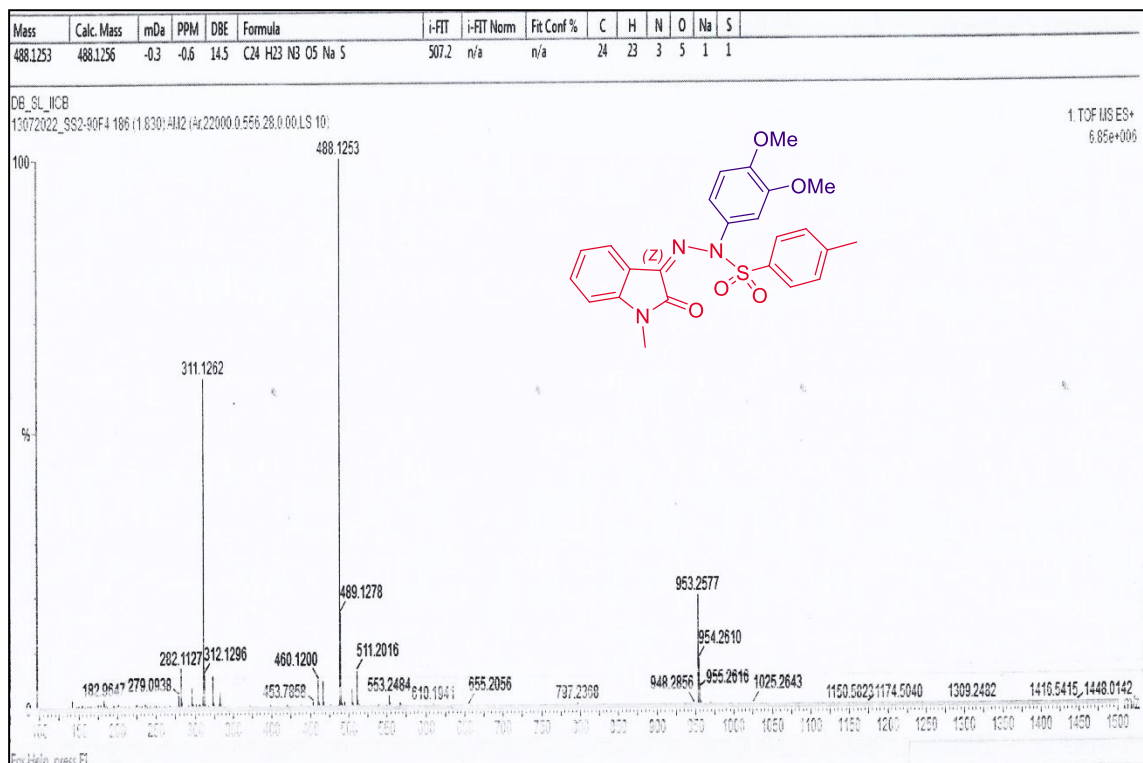

Figure 76. HRMS spectrum of compound 5d

## Supporting Information

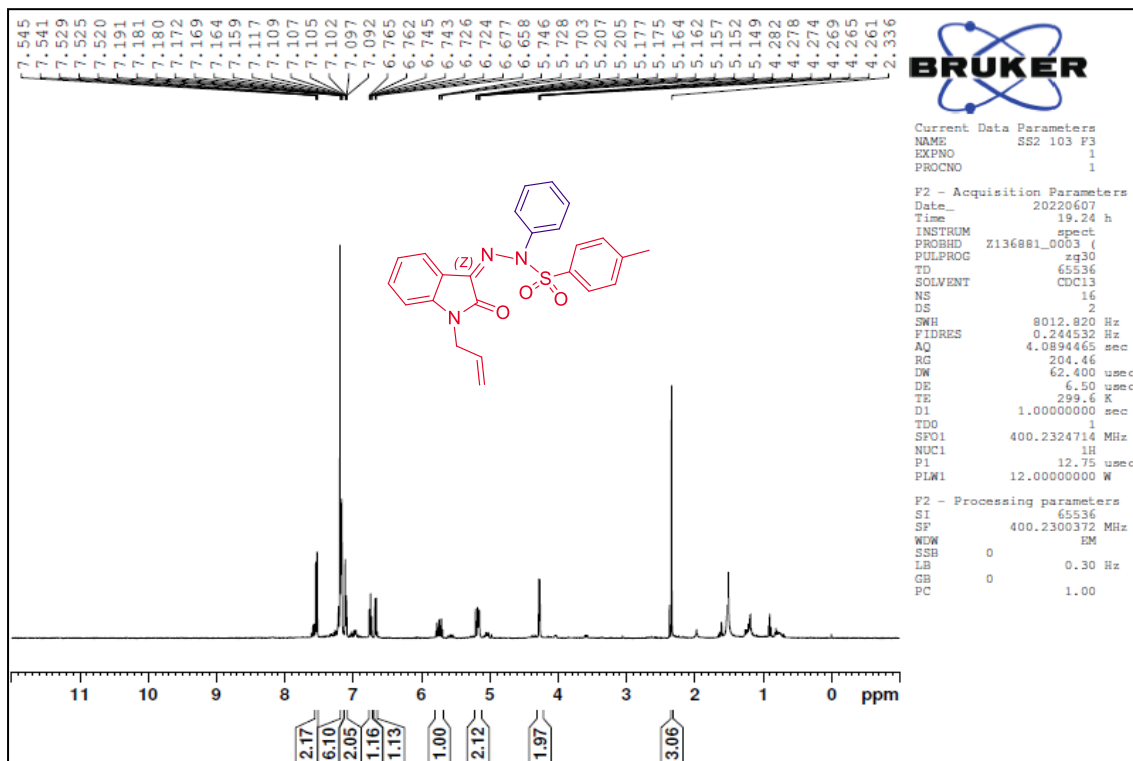

Figure 77. <sup>1</sup>H NMR spectrum of compound 5e

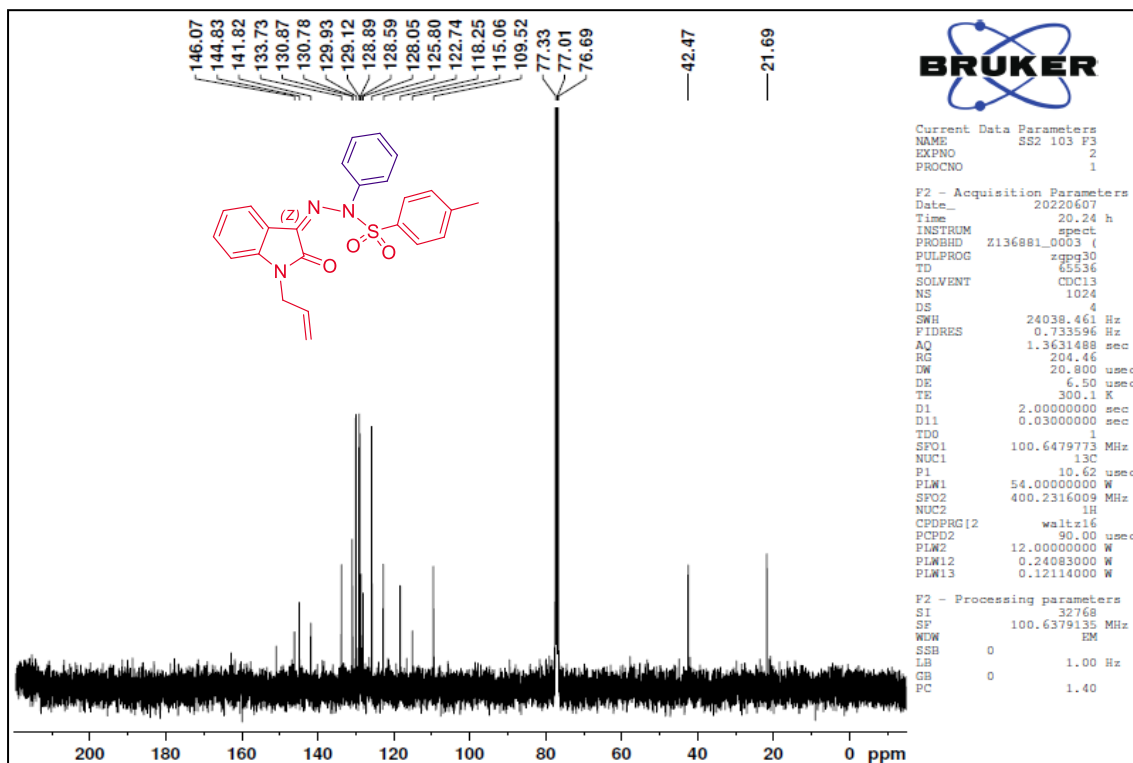

Figure 78. <sup>13</sup>C NMR spectrum of compound 5e



# Supporting Information

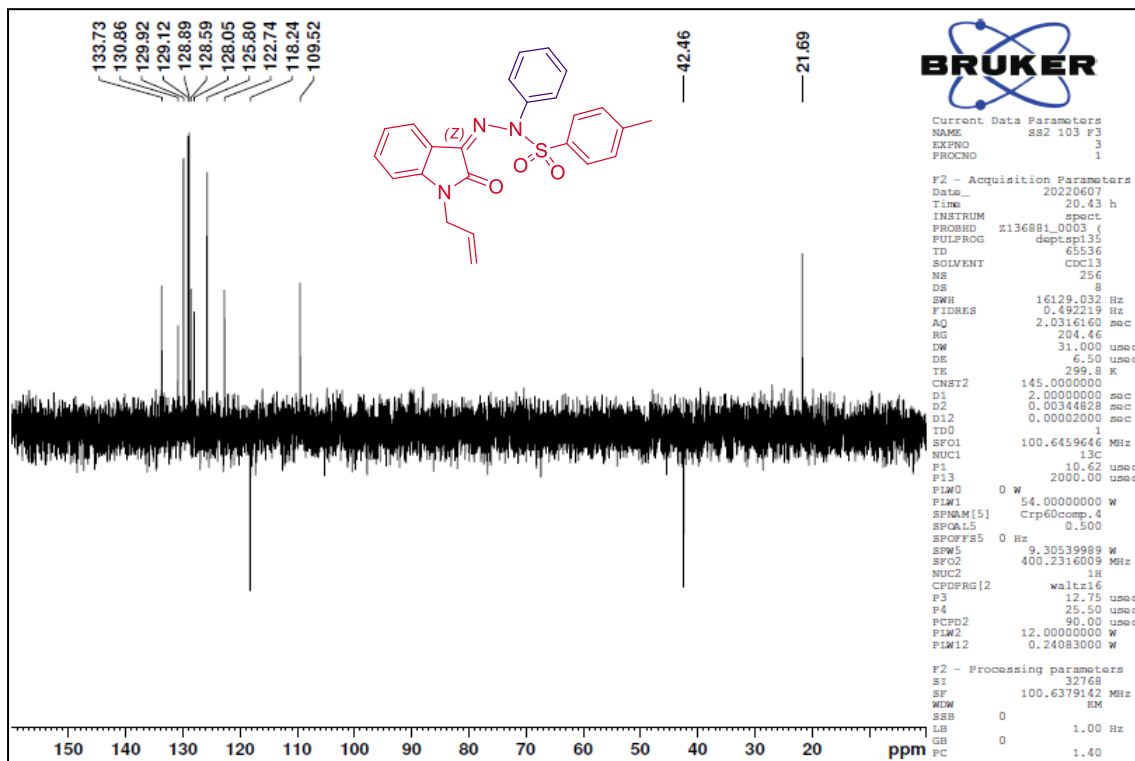

Figure 79. DEPT135 NMR spectrum of compound 5e

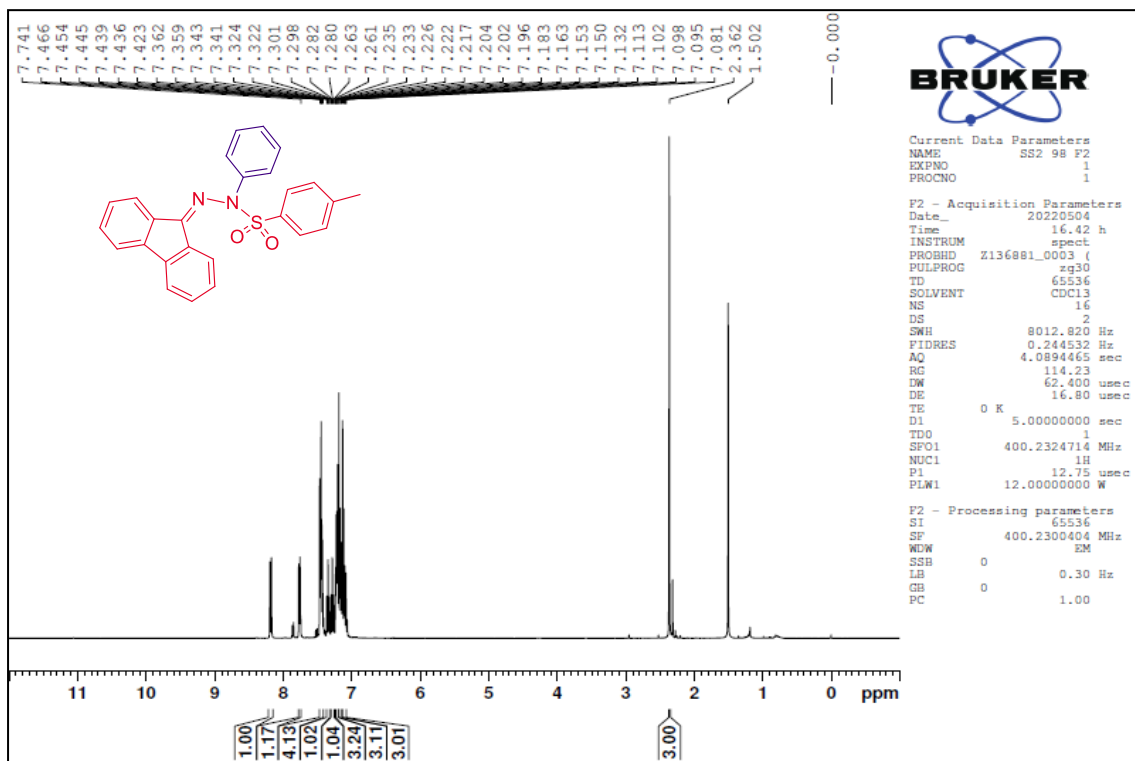

Figure 81. <sup>1</sup>H NMR spectrum of compound 5f

## Supporting Information

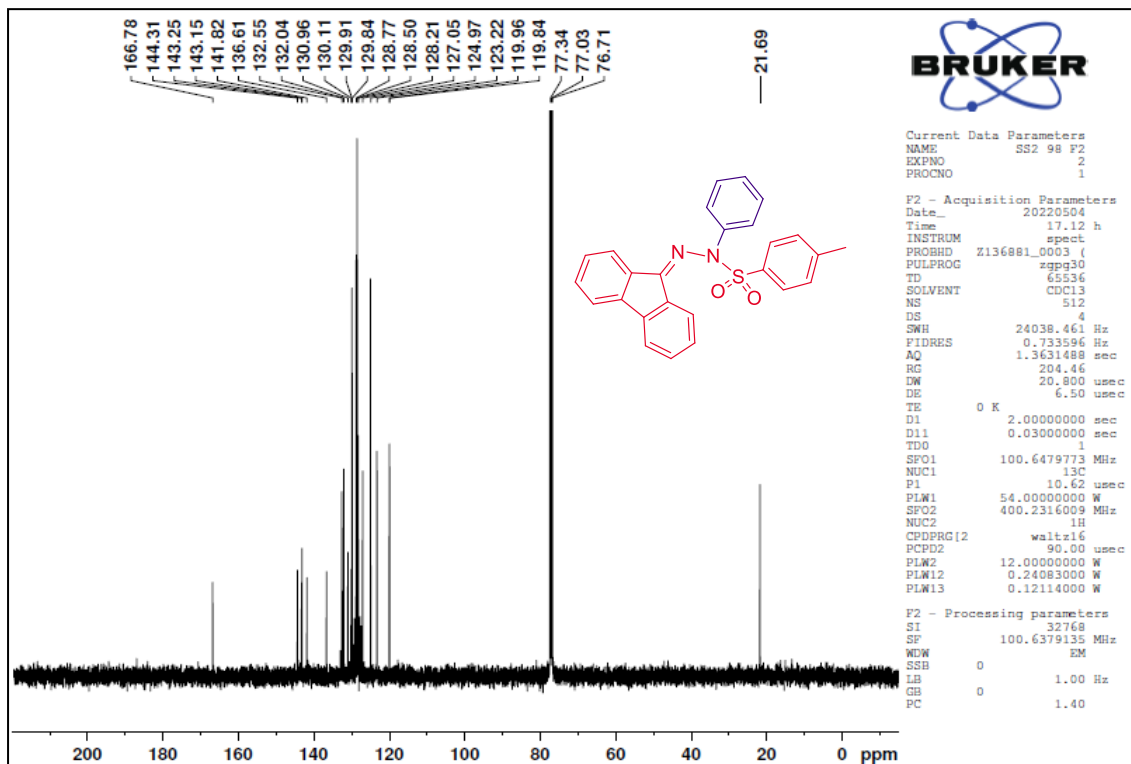

Figure 82. <sup>13</sup>C NMR spectrum of compound 5f

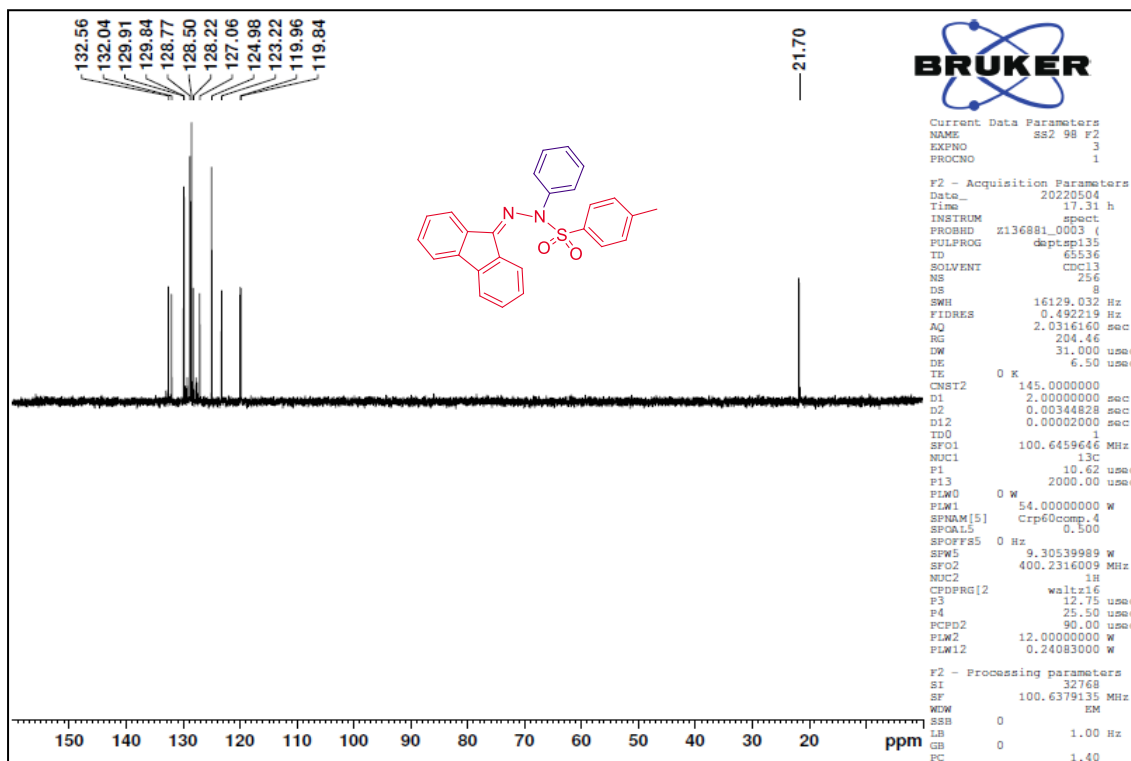

Figure 83. DEPT135 NMR spectrum of compound 5f

## Supporting Information

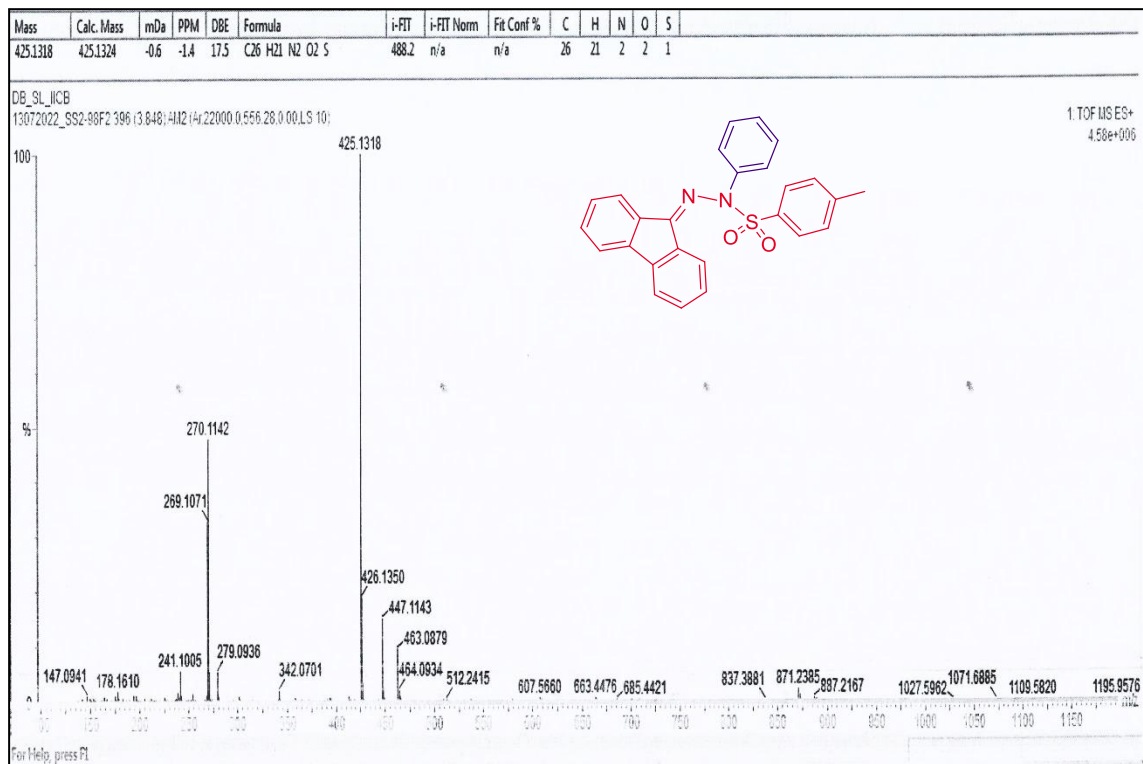

Figure 84.HRMS spectrum of compound 5f

### 5.1 Crystallographic data of compound 3a

## Supporting Information

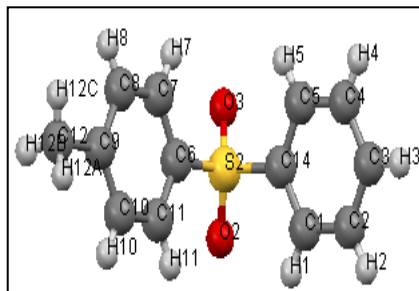

ORTEP diagram of compounds **3a** (CCDC-2179829)

**Table 1. Sample and crystal data for 3a.**

|                               |                                                  |                |
|-------------------------------|--------------------------------------------------|----------------|
| <b>Identification code</b>    | 3a                                               |                |
| <b>Chemical formula</b>       | C <sub>13</sub> H <sub>12</sub> O <sub>2</sub> S |                |
| <b>Formula weight</b>         | 232.29 g/mol                                     |                |
| <b>Temperature</b>            | 300(2) K                                         |                |
| <b>Wavelength</b>             | 0.71073 Å                                        |                |
| <b>Crystal size</b>           | 0.050 x 0.140 x 0.180 mm                         |                |
| <b>Crystal system</b>         | monoclinic                                       |                |
| <b>Space group</b>            | P 1 21/c 1                                       |                |
| <b>Unit cell dimensions</b>   | a = 13.0543(13) Å                                | α = 90°        |
|                               | b = 7.8336(8) Å                                  | β = 95.968(3)° |
|                               | c = 11.5876(12) Å                                | γ = 90°        |
| <b>Volume</b>                 | 1178.6(2) Å <sup>3</sup>                         |                |
| <b>Z</b>                      | 4                                                |                |
| <b>Density (calculated)</b>   | 1.309 g/cm <sup>3</sup>                          |                |
| <b>Absorption coefficient</b> | 0.256 mm <sup>-1</sup>                           |                |
| <b>F(000)</b>                 | 488                                              |                |

**Table 2. Data collection and structure refinement for 3a.**

## Supporting Information

---

|                                         |                                             |                                                                           |  |
|-----------------------------------------|---------------------------------------------|---------------------------------------------------------------------------|--|
| <b>Theta range for data collection</b>  | 3.04 to 28.36°                              |                                                                           |  |
| <b>Index ranges</b>                     | -17<=h<=17, -10<=k<=10, -15<=l<=15          |                                                                           |  |
| <b>Reflections collected</b>            | 26064                                       |                                                                           |  |
| <b>Independent reflections</b>          | 2939 [R(int) = 0.0500]                      |                                                                           |  |
| <b>Max. and min. transmission</b>       | 0.7457 and 0.6516                           |                                                                           |  |
| <b>Structure solution technique</b>     | direct methods                              |                                                                           |  |
| <b>Structure solution program</b>       | SHELXT 2018/2 (Sheldrick, 2018)             |                                                                           |  |
| <b>Refinement method</b>                | Full-matrix least-squares on F <sup>2</sup> |                                                                           |  |
| <b>Refinement program</b>               | SHELXL-2018/3 (Sheldrick, 2018)             |                                                                           |  |
| <b>Function minimized</b>               | $\Sigma w(F_o^2 - F_c^2)^2$                 |                                                                           |  |
| <b>Data / restraints / parameters</b>   | 2939 / 0 / 146                              |                                                                           |  |
| <b>Goodness-of-fit on F<sup>2</sup></b> | 1.039                                       |                                                                           |  |
| <b>Final R indices</b>                  | 1916 data;                                  | R1 = 0.0524, wR2 = 0.0991                                                 |  |
|                                         | I>2σ(I)                                     |                                                                           |  |
| <b>Weighting scheme</b>                 | all data                                    | R1 = 0.0918, wR2 = 0.1198                                                 |  |
|                                         |                                             | $w=1/[\sigma^2(F_o^2)+(0.0293P)^2+0.7008P]$<br>where $P=(F_o^2+2F_c^2)/3$ |  |
| <b>Largest diff. peak and hole</b>      | 0.260 and -0.299 eÅ <sup>-3</sup>           |                                                                           |  |
| <b>R.M.S. deviation from mean</b>       | 0.038 eÅ <sup>-3</sup>                      |                                                                           |  |

**Table 3. Atomic coordinates and equivalent isotropic atomic displacement parameters (Å<sup>2</sup>) for 3a.**

U(eq) is defined as one third of the trace of the orthogonalized U<sub>ij</sub> tensor.

|    | <b>x/a</b>  | <b>y/b</b> | <b>z/c</b>  | <b>U(eq)</b> |
|----|-------------|------------|-------------|--------------|
| S2 | 0.27013(4)  | 0.33249(8) | 0.68056(5)  | 0.0618(2)    |
| O2 | 0.26997(14) | 0.3924(3)  | 0.79781(14) | 0.0882(6)    |
| O3 | 0.22698(13) | 0.1681(2)  | 0.6495(2)   | 0.0929(7)    |

## Supporting Information

|     | <b>x/a</b>  | <b>y/b</b> | <b>z/c</b>  | <b>U(eq)</b> |
|-----|-------------|------------|-------------|--------------|
| C1  | 0.47206(17) | 0.4222(3)  | 0.71525(19) | 0.0569(6)    |
| C2  | 0.57291(18) | 0.4185(3)  | 0.6904(2)   | 0.0663(6)    |
| C3  | 0.59901(18) | 0.3292(3)  | 0.5966(2)   | 0.0640(6)    |
| C4  | 0.5255(2)   | 0.2432(3)  | 0.5269(2)   | 0.0683(7)    |
| C5  | 0.42445(18) | 0.2435(3)  | 0.55074(19) | 0.0604(6)    |
| C6  | 0.20643(15) | 0.4849(3)  | 0.58732(18) | 0.0490(5)    |
| C7  | 0.15909(18) | 0.4370(3)  | 0.4805(2)   | 0.0654(6)    |
| C8  | 0.10905(19) | 0.5589(4)  | 0.4093(2)   | 0.0726(7)    |
| C9  | 0.10575(16) | 0.7271(3)  | 0.4420(2)   | 0.0617(6)    |
| C10 | 0.15569(18) | 0.7731(3)  | 0.5483(2)   | 0.0651(6)    |
| C11 | 0.20576(17) | 0.6536(3)  | 0.62077(19) | 0.0587(6)    |
| C12 | 0.0487(2)   | 0.8585(4)  | 0.3647(3)   | 0.0944(10)   |
| C14 | 0.39851(15) | 0.3330(2)  | 0.64603(17) | 0.0450(5)    |

**Table 4. Bond lengths (Å) for 3a.**

|         |            |        |            |
|---------|------------|--------|------------|
| S2-O3   | 1.4361(19) | S2-O2  | 1.4376(19) |
| S2-C6   | 1.760(2)   | S2-C14 | 1.763(2)   |
| C1-C14  | 1.376(3)   | C1-C2  | 1.377(3)   |
| C2-C3   | 1.365(3)   | C3-C4  | 1.366(3)   |
| C4-C5   | 1.376(3)   | C5-C14 | 1.380(3)   |
| C6-C7   | 1.377(3)   | C6-C11 | 1.378(3)   |
| C7-C8   | 1.381(3)   | C8-C9  | 1.373(4)   |
| C9-C10  | 1.380(3)   | C9-C12 | 1.509(3)   |
| C10-C11 | 1.376(3)   |        |            |

**Table 5. Bond angles (°) for 3a.**

## Supporting Information

|            |            |            |            |
|------------|------------|------------|------------|
| O3-S2-O2   | 119.36(13) | O3-S2-C6   | 107.84(11) |
| O2-S2-C6   | 108.16(11) | O3-S2-C14  | 107.62(11) |
| O2-S2-C14  | 107.98(10) | C6-S2-C14  | 105.00(9)  |
| C14-C1-C2  | 119.5(2)   | C3-C2-C1   | 120.0(2)   |
| C2-C3-C4   | 120.4(2)   | C3-C4-C5   | 120.7(2)   |
| C4-C5-C14  | 118.8(2)   | C7-C6-C11  | 119.9(2)   |
| C7-C6-S2   | 120.43(18) | C11-C6-S2  | 119.64(17) |
| C6-C7-C8   | 119.3(2)   | C9-C8-C7   | 121.7(2)   |
| C8-C9-C10  | 118.1(2)   | C8-C9-C12  | 121.3(3)   |
| C10-C9-C12 | 120.6(3)   | C11-C10-C9 | 121.1(2)   |
| C10-C11-C6 | 119.8(2)   | C1-C14-C5  | 120.7(2)   |
| C1-C14-S2  | 119.41(16) | C5-C14-S2  | 119.91(16) |

**Table 6. Anisotropic atomic displacement parameters ( $\text{\AA}^2$ ) for 3a.**

The anisotropic atomic displacement factor exponent takes the form:  $-2\pi^2 [ h^2 a^{*2} U_{11} + \dots + 2 h k a^* b^* U_{12} ]$

|    | $U_{11}$   | $U_{22}$   | $U_{33}$   | $U_{23}$    | $U_{13}$    | $U_{12}$    |
|----|------------|------------|------------|-------------|-------------|-------------|
| S2 | 0.0514(3)  | 0.0653(4)  | 0.0694(4)  | 0.0198(3)   | 0.0100(3)   | 0.0037(3)   |
| O2 | 0.0790(12) | 0.1337(17) | 0.0552(10) | 0.0260(11)  | 0.0221(9)   | 0.0295(12)  |
| O3 | 0.0608(10) | 0.0601(11) | 0.1563(19) | 0.0330(12)  | 0.0045(11)  | -0.0117(9)  |
| C1 | 0.0625(14) | 0.0525(13) | 0.0549(13) | -0.0083(10) | 0.0015(10)  | 0.0043(11)  |
| C2 | 0.0577(14) | 0.0582(15) | 0.0810(17) | -0.0028(13) | -0.0026(12) | -0.0066(11) |
| C3 | 0.0526(13) | 0.0678(16) | 0.0734(16) | 0.0161(13)  | 0.0154(11)  | 0.0029(12)  |
| C4 | 0.0763(17) | 0.0788(18) | 0.0519(14) | -0.0026(12) | 0.0161(12)  | 0.0140(14)  |
| C5 | 0.0648(14) | 0.0621(15) | 0.0521(13) | -0.0067(11) | -0.0044(11) | 0.0015(11)  |
| C6 | 0.0417(10) | 0.0532(13) | 0.0522(12) | 0.0017(10)  | 0.0055(9)   | 0.0015(9)   |
| C7 | 0.0648(14) | 0.0575(14) | 0.0717(16) | -0.0080(12) | -0.0036(12) | -0.0031(12) |
| C8 | 0.0624(15) | 0.089(2)   | 0.0626(15) | -0.0014(14) | -0.0110(12) | -0.0014(14) |
| C9 | 0.0420(11) | 0.0789(17) | 0.0657(15) | 0.0175(13)  | 0.0120(10)  | 0.0099(11)  |

## Supporting Information

|     | <b>U<sub>11</sub></b> | <b>U<sub>22</sub></b> | <b>U<sub>33</sub></b> | <b>U<sub>23</sub></b> | <b>U<sub>13</sub></b> | <b>U<sub>12</sub></b> |
|-----|-----------------------|-----------------------|-----------------------|-----------------------|-----------------------|-----------------------|
| C10 | 0.0649(14)            | 0.0536(14)            | 0.0781(17)            | -0.0009(12)           | 0.0138(12)            | 0.0118(12)            |
| C11 | 0.0582(13)            | 0.0645(15)            | 0.0529(13)            | -0.0080(11)           | 0.0027(10)            | 0.0056(11)            |
| C12 | 0.0670(16)            | 0.118(3)              | 0.100(2)              | 0.0490(19)            | 0.0189(15)            | 0.0313(17)            |
| C14 | 0.0486(11)            | 0.0417(11)            | 0.0443(11)            | 0.0061(9)             | 0.0029(8)             | 0.0027(9)             |

**Table 7. Hydrogen atomic coordinates and isotropic atomic displacement parameters (Å<sup>2</sup>) for 3a.**

|      | <b>x/a</b> | <b>y/b</b> | <b>z/c</b> | <b>U(eq)</b> |
|------|------------|------------|------------|--------------|
| H1   | 0.4538     | 0.4845     | 0.7783     | 0.068000     |
| H2   | 0.6233     | 0.4768     | 0.7375     | 0.080000     |
| H3   | 0.6672     | 0.3268     | 0.5801     | 0.077000     |
| H4   | 0.5440     | 0.1839     | 0.4627     | 0.082000     |
| H5   | 0.3745     | 0.1844     | 0.5035     | 0.072000     |
| H7   | 0.1608     | 0.3238     | 0.4565     | 0.078000     |
| H8   | 0.0767     | 0.5262     | 0.3374     | 0.087000     |
| H10  | 0.1555     | 0.8868     | 0.5714     | 0.078000     |
| H11  | 0.2391     | 0.6867     | 0.6921     | 0.070000     |
| H12A | 0.0864     | 0.9639     | 0.3696     | 0.142000     |
| H12B | -0.0184    | 0.8767     | 0.3895     | 0.142000     |
| H12C | 0.0417     | 0.8185     | 0.2860     | 0.142000     |

Symmetry transformations used to generate equivalent atoms:

### 5.2 Crystallographic data of

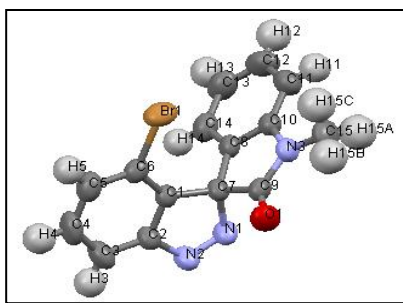

### compound 4b



ORTEP diagram of compounds **4b** (CCDC-2179825)**Table 1. Sample and crystal data for 4b.**

|                               |                                                    |                 |
|-------------------------------|----------------------------------------------------|-----------------|
| <b>Identification code</b>    | 4b                                                 |                 |
| <b>Chemical formula</b>       | C <sub>15</sub> H <sub>10</sub> BrN <sub>3</sub> O |                 |
| <b>Formula weight</b>         | 328.17 g/mol                                       |                 |
| <b>Temperature</b>            | 300(2) K                                           |                 |
| <b>Wavelength</b>             | 0.71073 Å                                          |                 |
| <b>Crystal size</b>           | 0.070 x 0.110 x 0.150 mm                           |                 |
| <b>Crystal system</b>         | monoclinic                                         |                 |
| <b>Space group</b>            | P 1 21/n 1                                         |                 |
| <b>Unit cell dimensions</b>   | a = 12.2098(8) Å                                   | α = 90°         |
|                               | b = 8.7386(6) Å                                    | β = 108.433(2)° |
|                               | c = 13.4142(9) Å                                   | γ = 90°         |
| <b>Volume</b>                 | 1357.82(16) Å <sup>3</sup>                         |                 |
| <b>Z</b>                      | 4                                                  |                 |
| <b>Density (calculated)</b>   | 1.605 g/cm <sup>3</sup>                            |                 |
| <b>Absorption coefficient</b> | 3.025 mm <sup>-1</sup>                             |                 |
| <b>F(000)</b>                 | 656                                                |                 |

**Table 2. Data collection and structure refinement for 4b.**

|                                        |                                          |
|----------------------------------------|------------------------------------------|
| <b>Theta range for data collection</b> | 1.97 to 27.12°                           |
| <b>Index ranges</b>                    | -15 ≤ h ≤ 14, -11 ≤ k ≤ 11, -14 ≤ l ≤ 17 |
| <b>Reflections collected</b>           | 23806                                    |
| <b>Independent reflections</b>         | 2977 [R(int) = 0.0518]                   |

## Supporting Information

---

|                                            |                                                                           |                           |
|--------------------------------------------|---------------------------------------------------------------------------|---------------------------|
| <b>Max. and min. transmission</b>          | 0.8160 and 0.6600                                                         |                           |
| <b>Structure solution technique</b>        | direct methods                                                            |                           |
| <b>Structure solution program</b>          | SHELXT 2018/2 (Sheldrick, 2018)                                           |                           |
| <b>Refinement method</b>                   | Full-matrix least-squares on $F^2$                                        |                           |
| <b>Refinement program</b>                  | SHELXL-2018/3 (Sheldrick, 2018)                                           |                           |
| <b>Function minimized</b>                  | $\Sigma w(F_o^2 - F_c^2)^2$                                               |                           |
| <b>Data / restraints / parameters</b>      | 2977 / 0 / 182                                                            |                           |
| <b>Goodness-of-fit on <math>F^2</math></b> | 1.021                                                                     |                           |
| <b><math>\Delta/\sigma_{\max}</math></b>   | 0.001                                                                     |                           |
| <b>Final R indices</b>                     | 2025 data; $I > 2\sigma(I)$                                               | R1 = 0.0453, wR2 = 0.1039 |
|                                            | all data                                                                  | R1 = 0.0810, wR2 = 0.1172 |
| <b>Weighting scheme</b>                    | $w=1/[\sigma^2(F_o^2)+(0.0591P)^2+0.4927P]$<br>where $P=(F_o^2+2F_c^2)/3$ |                           |
| <b>Largest diff. peak and hole</b>         | 0.651 and -0.441 $e\text{\AA}^{-3}$                                       |                           |
| <b>R.M.S. deviation from mean</b>          | 0.071 $e\text{\AA}^{-3}$                                                  |                           |

**Table 3. Atomic coordinates and equivalent isotropic atomic displacement parameters ( $\text{\AA}^2$ ) for 4b.**

U(eq) is defined as one third of the trace of the orthogonalized  $U_{ij}$  tensor.

|     | <b>x/a</b> | <b>y/b</b> | <b>z/c</b> | <b>U(eq)</b> |
|-----|------------|------------|------------|--------------|
| Br1 | 0.71105(3) | 0.51711(4) | 0.41938(3) | 0.06601(19)  |
| O1  | 0.6294(2)  | 0.2080(3)  | 0.1790(2)  | 0.0694(7)    |
| N1  | 0.3833(2)  | 0.2922(3)  | 0.1584(2)  | 0.0547(7)    |
| N2  | 0.3503(2)  | 0.2141(3)  | 0.2224(2)  | 0.0568(7)    |
| N3  | 0.6232(2)  | 0.4610(3)  | 0.1321(2)  | 0.0515(7)    |
| C1  | 0.5107(2)  | 0.3401(3)  | 0.3273(2)  | 0.0411(7)    |
| C2  | 0.4244(3)  | 0.2369(3)  | 0.3271(2)  | 0.0484(8)    |
| C3  | 0.4163(3)  | 0.1734(4)  | 0.4183(3)  | 0.0649(10)   |
| C4  | 0.4993(3)  | 0.2153(6)  | 0.5109(3)  | 0.0712(12)   |

## Supporting Information

|     | <b>x/a</b> | <b>y/b</b> | <b>z/c</b> | <b>U(eq)</b> |
|-----|------------|------------|------------|--------------|
| C5  | 0.5878(3)  | 0.3159(4)  | 0.5121(3)  | 0.0626(9)    |
| C6  | 0.5923(3)  | 0.3793(3)  | 0.4196(2)  | 0.0464(7)    |
| C7  | 0.4899(2)  | 0.3838(4)  | 0.2155(2)  | 0.0436(7)    |
| C8  | 0.4760(3)  | 0.5508(4)  | 0.1872(2)  | 0.0428(7)    |
| C9  | 0.5901(3)  | 0.3347(4)  | 0.1738(2)  | 0.0487(8)    |
| C10 | 0.5568(3)  | 0.5904(4)  | 0.1397(2)  | 0.0477(8)    |
| C11 | 0.5662(3)  | 0.7381(4)  | 0.1079(3)  | 0.0643(10)   |
| C12 | 0.4918(4)  | 0.8459(4)  | 0.1265(3)  | 0.0787(12)   |
| C13 | 0.4116(4)  | 0.8071(4)  | 0.1737(3)  | 0.0704(11)   |
| C14 | 0.4026(3)  | 0.6586(4)  | 0.2048(3)  | 0.0568(9)    |
| C15 | 0.7229(4)  | 0.4646(5)  | 0.0961(3)  | 0.0736(11)   |

**Table 4. Bond lengths (Å) for 4b.**

|        |          |        |          |
|--------|----------|--------|----------|
| Br1-C6 | 1.886(3) | O1-C9  | 1.199(4) |
| N1-N2  | 1.259(3) | N1-C7  | 1.513(4) |
| N2-C2  | 1.423(4) | N3-C9  | 1.356(4) |
| N3-C10 | 1.413(4) | N3-C15 | 1.445(4) |
| C1-C6  | 1.365(4) | C1-C2  | 1.387(4) |
| C1-C7  | 1.489(4) | C2-C3  | 1.375(4) |
| C3-C4  | 1.381(5) | C4-C5  | 1.389(5) |
| C5-C6  | 1.376(4) | C7-C8  | 1.504(4) |

## Supporting Information

---

|         |          |         |          |
|---------|----------|---------|----------|
| C7-C9   | 1.558(4) | C8-C14  | 1.371(4) |
| C8-C10  | 1.378(4) | C10-C11 | 1.375(5) |
| C11-C12 | 1.385(6) | C12-C13 | 1.366(6) |
| C13-C14 | 1.378(5) |         |          |

---

**Table 5. Bond angles (°) for 4b.**

|             |          |             |          |
|-------------|----------|-------------|----------|
| N2-N1-C7    | 110.5(2) | N1-N2-C2    | 110.9(2) |
| C9-N3-C10   | 111.7(3) | C9-N3-C15   | 123.2(3) |
| C10-N3-C15  | 124.7(3) | C6-C1-C2    | 120.1(3) |
| C6-C1-C7    | 133.8(3) | C2-C1-C7    | 106.1(3) |
| C3-C2-C1    | 121.9(3) | C3-C2-N2    | 128.3(3) |
| C1-C2-N2    | 109.8(3) | C2-C3-C4    | 117.0(3) |
| C3-C4-C5    | 121.7(3) | C6-C5-C4    | 119.8(3) |
| C1-C6-C5    | 119.4(3) | C1-C6-Br1   | 120.0(2) |
| C5-C6-Br1   | 120.6(3) | C1-C7-C8    | 118.2(2) |
| C1-C7-N1    | 102.7(2) | C8-C7-N1    | 112.1(2) |
| C1-C7-C9    | 112.8(3) | C8-C7-C9    | 102.4(2) |
| N1-C7-C9    | 108.6(2) | C14-C8-C10  | 120.7(3) |
| C14-C8-C7   | 130.6(3) | C10-C8-C7   | 108.7(3) |
| O1-C9-N3    | 127.6(3) | O1-C9-C7    | 125.3(3) |
| N3-C9-C7    | 107.1(3) | C11-C10-C8  | 121.4(3) |
| C11-C10-N3  | 128.5(3) | C8-C10-N3   | 110.1(3) |
| C10-C11-C12 | 117.3(4) | C13-C12-C11 | 121.4(4) |
| C12-C13-C14 | 120.8(4) | C8-C14-C13  | 118.4(3) |

---

**Table 6. Anisotropic atomic displacement parameters ( $\text{\AA}^2$ ) for 4b.**

## Supporting Information

---

The anisotropic atomic displacement factor exponent takes the form:  $-2\pi^2 [ h^2 a^{*2} U_{11} + \dots + 2 h k a^* b^* U_{12} ]$

|     | <b>U<sub>11</sub></b> | <b>U<sub>22</sub></b> | <b>U<sub>33</sub></b> | <b>U<sub>23</sub></b> | <b>U<sub>13</sub></b> | <b>U<sub>12</sub></b> |
|-----|-----------------------|-----------------------|-----------------------|-----------------------|-----------------------|-----------------------|
| Br1 | 0.0444(2)             | 0.0652(3)             | 0.0784(3)             | -0.01519(17)          | 0.0050(2)             | -0.00667(15)          |
| O1  | 0.0804(18)            | 0.0526(15)            | 0.0871(19)            | -0.0042(13)           | 0.0434(15)            | 0.0084(13)            |
| N1  | 0.0492(16)            | 0.0686(18)            | 0.0424(16)            | -0.0030(14)           | 0.0091(13)            | -0.0145(14)           |
| N2  | 0.0498(16)            | 0.0680(18)            | 0.0502(18)            | 0.0028(14)            | 0.0123(14)            | -0.0160(14)           |
| N3  | 0.0501(17)            | 0.0585(17)            | 0.0544(17)            | -0.0051(13)           | 0.0287(14)            | -0.0071(13)           |
| C1  | 0.0379(16)            | 0.0478(17)            | 0.0384(17)            | 0.0011(13)            | 0.0130(14)            | 0.0031(13)            |
| C2  | 0.0416(17)            | 0.0559(19)            | 0.048(2)              | 0.0049(15)            | 0.0150(15)            | -0.0022(14)           |
| C3  | 0.059(2)              | 0.077(3)              | 0.061(2)              | 0.0225(19)            | 0.022(2)              | -0.0030(18)           |
| C4  | 0.078(3)              | 0.093(3)              | 0.046(2)              | 0.0244(19)            | 0.025(2)              | 0.019(2)              |
| C5  | 0.062(2)              | 0.078(2)              | 0.044(2)              | 0.0032(18)            | 0.0112(18)            | 0.016(2)              |
| C6  | 0.0404(17)            | 0.0508(17)            | 0.0448(19)            | -0.0034(15)           | 0.0089(15)            | 0.0093(14)            |
| C7  | 0.0395(17)            | 0.0524(18)            | 0.0404(18)            | -0.0008(14)           | 0.0148(14)            | -0.0064(13)           |
| C8  | 0.0441(18)            | 0.0505(17)            | 0.0320(16)            | 0.0004(13)            | 0.0096(14)            | 0.0000(14)            |
| C9  | 0.0476(19)            | 0.056(2)              | 0.0445(19)            | -0.0090(15)           | 0.0174(15)            | -0.0041(16)           |
| C10 | 0.0501(19)            | 0.0516(19)            | 0.0396(18)            | -0.0011(14)           | 0.0116(15)            | -0.0053(15)           |
| C11 | 0.071(2)              | 0.062(2)              | 0.061(2)              | 0.0097(18)            | 0.021(2)              | -0.0090(19)           |
| C12 | 0.101(3)              | 0.050(2)              | 0.071(3)              | 0.0100(19)            | 0.007(2)              | 0.000(2)              |
| C13 | 0.082(3)              | 0.062(2)              | 0.060(2)              | 0.0029(19)            | 0.012(2)              | 0.023(2)              |
| C14 | 0.052(2)              | 0.071(2)              | 0.0433(19)            | 0.0014(16)            | 0.0092(16)            | 0.0128(17)            |
| C15 | 0.066(3)              | 0.089(3)              | 0.080(3)              | -0.005(2)             | 0.045(2)              | -0.005(2)             |

**Table 7. Hydrogen atomic coordinates and isotropic atomic displacement parameters (Å<sup>2</sup>) for 4b.**

## Supporting Information

---

|      | <b>x/a</b> | <b>y/b</b> | <b>z/c</b> | <b>U(eq)</b> |
|------|------------|------------|------------|--------------|
| H3   | 0.3576     | 0.1052     | 0.4176     | 0.078000     |
| H4   | 0.4958     | 0.1751     | 0.5740     | 0.085000     |
| H5   | 0.6438     | 0.3404     | 0.5752     | 0.075000     |
| H11  | 0.6202     | 0.7645     | 0.0751     | 0.077000     |
| H12  | 0.4966     | 0.9470     | 0.1065     | 0.094000     |
| H13  | 0.3625     | 0.8817     | 0.1849     | 0.085000     |
| H14  | 0.3481     | 0.6322     | 0.2370     | 0.068000     |
| H15A | 0.6993     | 0.4926     | 0.0231     | 0.110000     |
| H15B | 0.7583     | 0.3653     | 0.1048     | 0.110000     |
| H15C | 0.7773     | 0.5384     | 0.1363     | 0.110000     |

Symmetry transformations used to generate equivalent atoms:

### 5.3 Crystallographic data of compound 4f

## Supporting Information

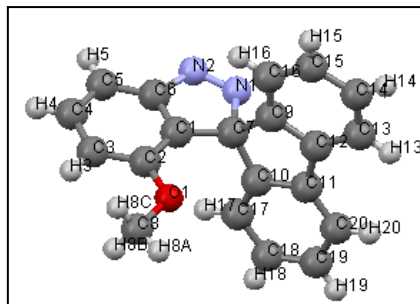

ORTEP diagram of compounds **4f** (CCDC-2179832)

**Table 1. Sample and crystal data for 4f.**

|                               |                                                                                                     |
|-------------------------------|-----------------------------------------------------------------------------------------------------|
| <b>Identification code</b>    | 4f                                                                                                  |
| <b>Chemical formula</b>       | C <sub>20</sub> H <sub>14</sub> N <sub>2</sub> O                                                    |
| <b>Formula weight</b>         | 298.33 g/mol                                                                                        |
| <b>Temperature</b>            | 300(2) K                                                                                            |
| <b>Wavelength</b>             | 0.71073 Å                                                                                           |
| <b>Crystal size</b>           | 0.100 x 0.190 x 0.230 mm                                                                            |
| <b>Crystal system</b>         | monoclinic                                                                                          |
| <b>Space group</b>            | P 1 21/n 1                                                                                          |
| <b>Unit cell dimensions</b>   | a = 8.7215(4) Å      α = 90°<br>b = 8.0965(4) Å      β = 98.010(2)°<br>c = 21.5872(11) Å    γ = 90° |
| <b>Volume</b>                 | 1509.48(13) Å <sup>3</sup>                                                                          |
| <b>Z</b>                      | 4                                                                                                   |
| <b>Density (calculated)</b>   | 1.313 g/cm <sup>3</sup>                                                                             |
| <b>Absorption coefficient</b> | 0.082 mm <sup>-1</sup>                                                                              |
| <b>F(000)</b>                 | 624                                                                                                 |

**Table 2. Data collection and structure refinement for 4f.**

## Supporting Information

---

|                                         |                                                                                                                                                               |              |              |
|-----------------------------------------|---------------------------------------------------------------------------------------------------------------------------------------------------------------|--------------|--------------|
| <b>Theta range for data collection</b>  | 1.91 to 28.20°                                                                                                                                                |              |              |
| <b>Index ranges</b>                     | -11<=h<=11, -10<=k<=8, -28<=l<=28                                                                                                                             |              |              |
| <b>Reflections collected</b>            | 19671                                                                                                                                                         |              |              |
| <b>Independent reflections</b>          | 3694 [R(int) = 0.0432]                                                                                                                                        |              |              |
| <b>Max. and min. transmission</b>       | 0.9920 and 0.9810                                                                                                                                             |              |              |
| <b>Structure solution technique</b>     | direct methods                                                                                                                                                |              |              |
| <b>Structure solution program</b>       | SHELXT 2018/2 (Sheldrick, 2018)                                                                                                                               |              |              |
| <b>Refinement method</b>                | Full-matrix least-squares on F <sup>2</sup>                                                                                                                   |              |              |
| <b>Refinement program</b>               | SHELXL-2018/3 (Sheldrick, 2018)                                                                                                                               |              |              |
| <b>Function minimized</b>               | $\Sigma w(F_o^2 - F_c^2)^2$                                                                                                                                   |              |              |
| <b>Data / restraints / parameters</b>   | 3694 / 0 / 209                                                                                                                                                |              |              |
| <b>Goodness-of-fit on F<sup>2</sup></b> | 1.031                                                                                                                                                         |              |              |
| <b>Final R indices</b>                  | 2342 data;<br>I>2σ(I)                                                                                                                                         | R1 = 0.0495, | wR2 = 0.1136 |
|                                         | all data                                                                                                                                                      | R1 = 0.0914, | wR2 = 0.1405 |
| <b>Weighting scheme</b>                 | w=1/[σ <sup>2</sup> (F <sub>o</sub> <sup>2</sup> )+(0.0585P) <sup>2</sup> +0.3359P]<br>where P=(F <sub>o</sub> <sup>2</sup> +2F <sub>c</sub> <sup>2</sup> )/3 |              |              |
| <b>Largest diff. peak and hole</b>      | 0.163 and -0.159 eÅ <sup>-3</sup>                                                                                                                             |              |              |
| <b>R.M.S. deviation from mean</b>       | 0.037 eÅ <sup>-3</sup>                                                                                                                                        |              |              |

**Table 3. Atomic coordinates and equivalent isotropic atomic displacement parameters (Å<sup>2</sup>) for 4f.**

U(eq) is defined as one third of the trace of the orthogonalized U<sub>ij</sub> tensor.

|    | <b>x/a</b>  | <b>y/b</b>  | <b>z/c</b> | <b>U(eq)</b> |
|----|-------------|-------------|------------|--------------|
| O1 | 0.45954(13) | 0.49932(13) | 0.36249(6) | 0.0536(3)    |
| N1 | 0.65524(15) | 0.99881(16) | 0.39988(6) | 0.0478(4)    |
| N2 | 0.75385(16) | 0.94521(18) | 0.44315(7) | 0.0519(4)    |
| C1 | 0.61821(17) | 0.71315(19) | 0.40625(7) | 0.0395(4)    |



## Supporting Information

|     | <b>x/a</b>  | <b>y/b</b>  | <b>z/c</b>  | <b>U(eq)</b> |
|-----|-------------|-------------|-------------|--------------|
| C2  | 0.57753(18) | 0.54790(19) | 0.40609(7)  | 0.0424(4)    |
| C3  | 0.6611(2)   | 0.4446(2)   | 0.45008(8)  | 0.0546(5)    |
| C4  | 0.7797(2)   | 0.5063(2)   | 0.49311(9)  | 0.0635(5)    |
| C5  | 0.8206(2)   | 0.6701(2)   | 0.49437(8)  | 0.0608(5)    |
| C6  | 0.73663(18) | 0.7701(2)   | 0.45011(7)  | 0.0457(4)    |
| C7  | 0.55520(17) | 0.85754(18) | 0.36848(7)  | 0.0401(4)    |
| C8  | 0.4154(2)   | 0.3293(2)   | 0.36201(11) | 0.0676(6)    |
| C9  | 0.57317(18) | 0.87072(18) | 0.29948(7)  | 0.0418(4)    |
| C10 | 0.38610(17) | 0.90346(18) | 0.36767(7)  | 0.0397(4)    |
| C11 | 0.32315(18) | 0.95793(19) | 0.30806(7)  | 0.0425(4)    |
| C12 | 0.44122(18) | 0.94345(19) | 0.26636(7)  | 0.0433(4)    |
| C13 | 0.4395(2)   | 0.9869(2)   | 0.20388(8)  | 0.0562(5)    |
| C14 | 0.5670(2)   | 0.9500(3)   | 0.17508(9)  | 0.0688(6)    |
| C15 | 0.6935(2)   | 0.8718(3)   | 0.20733(10) | 0.0706(6)    |
| C16 | 0.7002(2)   | 0.8334(2)   | 0.27056(9)  | 0.0562(5)    |
| C17 | 0.2992(2)   | 0.9004(2)   | 0.41606(8)  | 0.0503(4)    |
| C18 | 0.1461(2)   | 0.9515(2)   | 0.40466(9)  | 0.0589(5)    |
| C19 | 0.0831(2)   | 0.0054(2)   | 0.34611(10) | 0.0588(5)    |
| C20 | 0.1698(2)   | 0.0100(2)   | 0.29737(9)  | 0.0529(5)    |

**Table 4. Bond lengths (Å) for 4f.**

|       |            |       |            |
|-------|------------|-------|------------|
| O1-C2 | 1.3526(19) | O1-C8 | 1.429(2)   |
| N1-N2 | 1.2556(18) | N1-C7 | 1.5377(19) |
| N2-C6 | 1.436(2)   | C1-C6 | 1.380(2)   |
| C1-C2 | 1.384(2)   | C1-C7 | 1.486(2)   |
| C2-C3 | 1.393(2)   | C3-C4 | 1.384(3)   |
| C4-C5 | 1.373(3)   | C5-C6 | 1.382(2)   |

## Supporting Information

---

|         |          |         |          |
|---------|----------|---------|----------|
| C7-C10  | 1.519(2) | C7-C9   | 1.523(2) |
| C9-C16  | 1.379(2) | C9-C12  | 1.397(2) |
| C10-C17 | 1.374(2) | C10-C11 | 1.398(2) |
| C11-C20 | 1.390(2) | C11-C12 | 1.464(2) |
| C12-C13 | 1.392(2) | C13-C14 | 1.380(3) |
| C14-C15 | 1.375(3) | C15-C16 | 1.393(3) |
| C17-C18 | 1.387(2) | C18-C19 | 1.377(3) |
| C19-C20 | 1.379(3) |         |          |

---

**Table 5. Bond angles (°) for 4f.**

|             |            |             |            |
|-------------|------------|-------------|------------|
| C2-O1-C8    | 117.60(13) | N2-N1-C7    | 111.02(12) |
| N1-N2-C6    | 110.38(13) | C6-C1-C2    | 119.48(14) |
| C6-C1-C7    | 107.32(14) | C2-C1-C7    | 133.15(14) |
| O1-C2-C1    | 116.92(13) | O1-C2-C3    | 125.09(15) |
| C1-C2-C3    | 117.99(15) | C4-C3-C2    | 120.79(17) |
| C5-C4-C3    | 122.02(16) | C4-C5-C6    | 116.17(17) |
| C1-C6-C5    | 123.54(16) | C1-C6-N2    | 109.73(13) |
| C5-C6-N2    | 126.70(15) | C1-C7-C10   | 118.89(13) |
| C1-C7-C9    | 120.74(13) | C10-C7-C9   | 101.75(12) |
| C1-C7-N1    | 101.51(11) | C10-C7-N1   | 108.27(12) |
| C9-C7-N1    | 104.45(12) | C16-C9-C12  | 121.13(16) |
| C16-C9-C7   | 128.77(15) | C12-C9-C7   | 109.89(14) |
| C17-C10-C11 | 121.19(15) | C17-C10-C7  | 128.67(14) |
| C11-C10-C7  | 110.12(14) | C20-C11-C10 | 119.57(16) |
| C20-C11-C12 | 131.69(15) | C10-C11-C12 | 108.72(13) |
| C13-C12-C9  | 119.94(16) | C13-C12-C11 | 131.45(15) |
| C9-C12-C11  | 108.60(13) | C14-C13-C12 | 118.76(17) |
| C15-C14-C13 | 120.80(18) | C14-C15-C16 | 121.31(19) |
| C9-C16-C15  | 117.94(18) | C10-C17-C18 | 118.67(16) |

## Supporting Information

---

|             |            |             |            |
|-------------|------------|-------------|------------|
| C19-C18-C17 | 120.55(18) | C18-C19-C20 | 121.18(17) |
| C19-C20-C11 | 118.84(17) |             |            |

---

**Table 6. Anisotropic atomic displacement parameters ( $\text{\AA}^2$ ) for 4f.**

The anisotropic atomic displacement factor exponent takes the form:  $-2\pi^2[ h^2 a^{*2} U_{11} + \dots + 2 h k a^* b^* U_{12} ]$

|     | U <sub>11</sub> | U <sub>22</sub> | U <sub>33</sub> | U <sub>23</sub> | U <sub>13</sub> | U <sub>12</sub> |
|-----|-----------------|-----------------|-----------------|-----------------|-----------------|-----------------|
| O1  | 0.0552(7)       | 0.0315(6)       | 0.0700(8)       | 0.0039(5)       | -0.0062(6)      | -0.0034(5)      |
| N1  | 0.0488(8)       | 0.0386(8)       | 0.0538(8)       | -0.0028(6)      | -0.0008(7)      | -0.0014(6)      |
| N2  | 0.0507(8)       | 0.0479(9)       | 0.0544(9)       | -0.0057(7)      | -0.0026(7)      | -0.0004(7)      |
| C1  | 0.0405(8)       | 0.0363(9)       | 0.0411(8)       | 0.0018(6)       | 0.0041(6)       | 0.0042(7)       |
| C2  | 0.0443(9)       | 0.0358(9)       | 0.0476(9)       | 0.0030(7)       | 0.0085(7)       | 0.0050(7)       |
| C3  | 0.0629(11)      | 0.0407(10)      | 0.0603(11)      | 0.0126(8)       | 0.0083(9)       | 0.0085(8)       |
| C4  | 0.0697(12)      | 0.0602(13)      | 0.0571(11)      | 0.0161(9)       | -0.0038(9)      | 0.0178(10)      |
| C5  | 0.0601(11)      | 0.0637(13)      | 0.0533(10)      | 0.0018(9)       | -0.0107(8)      | 0.0111(9)       |
| C6  | 0.0461(9)       | 0.0440(10)      | 0.0458(9)       | -0.0015(7)      | 0.0021(7)       | 0.0053(7)       |
| C7  | 0.0418(8)       | 0.0306(8)       | 0.0463(9)       | 0.0017(6)       | 0.0007(7)       | -0.0003(6)      |
| C8  | 0.0592(11)      | 0.0342(10)      | 0.1073(16)      | 0.0053(10)      | 0.0038(11)      | -0.0059(8)      |
| C9  | 0.0455(9)       | 0.0311(8)       | 0.0486(9)       | 0.0019(7)       | 0.0057(7)       | -0.0052(7)      |
| C10 | 0.0431(8)       | 0.0287(8)       | 0.0463(9)       | -0.0008(6)      | 0.0022(7)       | 0.0003(6)       |
| C11 | 0.0449(9)       | 0.0320(8)       | 0.0484(9)       | -0.0011(7)      | -0.0015(7)      | -0.0035(7)      |
| C12 | 0.0491(9)       | 0.0346(8)       | 0.0442(9)       | 0.0008(7)       | -0.0001(7)      | -0.0069(7)      |
| C13 | 0.0584(11)      | 0.0582(12)      | 0.0489(10)      | 0.0084(8)       | -0.0032(9)      | -0.0119(9)      |
| C14 | 0.0756(14)      | 0.0804(15)      | 0.0512(11)      | 0.0083(10)      | 0.0116(10)      | -0.0193(11)     |
| C15 | 0.0696(13)      | 0.0796(15)      | 0.0683(13)      | 0.0019(11)      | 0.0295(11)      | -0.0089(11)     |
| C16 | 0.0502(10)      | 0.0523(11)      | 0.0672(12)      | 0.0049(9)       | 0.0125(9)       | -0.0027(8)      |
| C17 | 0.0541(10)      | 0.0466(10)      | 0.0503(10)      | 0.0009(8)       | 0.0076(8)       | 0.0027(8)       |
| C18 | 0.0526(11)      | 0.0578(12)      | 0.0686(12)      | -0.0082(9)      | 0.0168(9)       | -0.0004(9)      |
| C19 | 0.0417(9)       | 0.0550(12)      | 0.0779(13)      | -0.0108(10)     | 0.0024(9)       | 0.0041(8)       |

## Supporting Information

|     | $U_{11}$  | $U_{22}$   | $U_{33}$   | $U_{23}$   | $U_{13}$   | $U_{12}$  |
|-----|-----------|------------|------------|------------|------------|-----------|
| C20 | 0.0483(9) | 0.0454(10) | 0.0607(11) | -0.0008(8) | -0.0081(8) | 0.0013(8) |

**Table 7. Hydrogen atomic coordinates and isotropic atomic displacement parameters ( $\text{\AA}^2$ ) for 4f.**

|     | $x/a$   | $y/b$  | $z/c$  | $U(\text{eq})$ |
|-----|---------|--------|--------|----------------|
| H3  | 0.6369  | 0.3327 | 0.4505 | 0.066000       |
| H4  | 0.8333  | 0.4346 | 0.5221 | 0.076000       |
| H5  | 0.9003  | 0.7114 | 0.5233 | 0.073000       |
| H8A | 0.3365  | 0.3090 | 0.3272 | 0.101000       |
| H8B | 0.3760  | 0.3033 | 0.4002 | 0.101000       |
| H8C | 0.5039  | 0.2614 | 0.3583 | 0.101000       |
| H13 | 0.3540  | 1.0398 | 0.1819 | 0.067000       |
| H14 | 0.5673  | 0.9784 | 0.1334 | 0.083000       |
| H15 | 0.7764  | 0.8439 | 0.1865 | 0.085000       |
| H16 | 0.7876  | 0.7842 | 0.2926 | 0.067000       |
| H17 | 0.3422  | 0.8649 | 0.4557 | 0.060000       |
| H18 | 0.0854  | 0.9492 | 0.4368 | 0.071000       |
| H19 | -0.0198 | 1.0393 | 0.3393 | 0.071000       |
| H20 | 0.1265  | 1.0472 | 0.2581 | 0.064000       |

Symmetry transformations used to generate equivalent atoms:

## Supporting Information

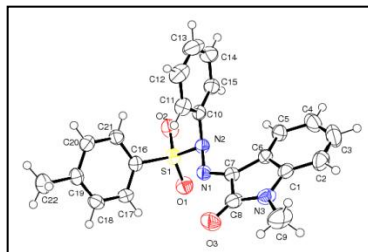

ORTEP diagram of compounds **5a** (CCDC-2179553)

**Table 1. Crystal data and structure refinement for 5a.**

|                                   |                                                                 |                  |
|-----------------------------------|-----------------------------------------------------------------|------------------|
| Identification code               | 5a                                                              |                  |
| Empirical formula                 | C <sub>22</sub> H <sub>19</sub> N <sub>3</sub> O <sub>3</sub> S |                  |
| Formula weight                    | 405.46                                                          |                  |
| Temperature                       | 298(2) K                                                        |                  |
| Wavelength                        | 0.71073 Å                                                       |                  |
| Crystal system                    | Triclinic                                                       |                  |
| Space group                       | P -1                                                            |                  |
| Unit cell dimensions              | a = 9.1555(6) Å                                                 | α = 103.303(2)°. |
|                                   | b = 10.4074(7) Å                                                | β = 99.290(2)°.  |
|                                   | c = 11.9079(7) Å                                                | γ = 112.822(2)°. |
| Volume                            | 977.20(11) Å <sup>3</sup>                                       |                  |
| Z                                 | 2                                                               |                  |
| Density (calculated)              | 1.378 Mg/m <sup>3</sup>                                         |                  |
| Absorption coefficient            | 0.195 mm <sup>-1</sup>                                          |                  |
| F(000)                            | 424                                                             |                  |
| Crystal size                      | 0.238 x 0.117 x 0.052 mm <sup>3</sup>                           |                  |
| Theta range for data collection   | 3.128 to 26.484°.                                               |                  |
| Index ranges                      | -11 ≤ h ≤ 11, -13 ≤ k ≤ 13, -14 ≤ l ≤ 14                        |                  |
| Reflections collected             | 30992                                                           |                  |
| Independent reflections           | 4015 [R(int) = 0.1050]                                          |                  |
| Completeness to theta = 25.242°   | 99.8 %                                                          |                  |
| Absorption correction             | Semi-empirical from equivalents                                 |                  |
| Max. and min. transmission        | 0.986 and 0.943                                                 |                  |
| Refinement method                 | Full-matrix least-squares on F <sup>2</sup>                     |                  |
| Data / restraints / parameters    | 4015 / 0 / 264                                                  |                  |
| Goodness-of-fit on F <sup>2</sup> | 1.027                                                           |                  |
| Final R indices [I > 2σ(I)]       | R1 = 0.0511, wR2 = 0.1096                                       |                  |

## Supporting Information

|                             |                                    |
|-----------------------------|------------------------------------|
| R indices (all data)        | R1 = 0.0846, wR2 = 0.1251          |
| Extinction coefficient      | n/a                                |
| Largest diff. peak and hole | 0.246 and -0.358 e.Å <sup>-3</sup> |

**Table 2.** Atomic coordinates ( $\times 10^4$ ) and equivalent isotropic displacement parameters ( $\text{Å}^2 \times 10^3$ ) for **5a**.

U(eq) is defined as one third of the trace of the orthogonalized  $U^{ij}$  tensor.

|       | x       | y        | z       | U(eq) |
|-------|---------|----------|---------|-------|
| C(1)  | 1200(3) | 57(3)    | 1504(2) | 41(1) |
| C(2)  | 1144(4) | -1265(3) | 878(3)  | 57(1) |
| C(3)  | 2039(4) | -1240(3) | 45(3)   | 65(1) |
| C(4)  | 2945(4) | 41(3)    | -169(2) | 57(1) |
| C(5)  | 3008(3) | 1373(3)  | 462(2)  | 43(1) |
| C(6)  | 2146(3) | 1380(2)  | 1319(2) | 35(1) |
| C(7)  | 1850(3) | 2519(3)  | 2086(2) | 34(1) |
| C(8)  | 638(3)  | 1745(3)  | 2724(2) | 42(1) |
| C(9)  | -714(4) | -810(4)  | 2781(3) | 72(1) |
| C(10) | 5227(3) | 4704(2)  | 2334(2) | 35(1) |
| C(11) | 5682(3) | 4747(3)  | 3515(2) | 43(1) |
| C(12) | 7218(4) | 4849(3)  | 3989(3) | 57(1) |
| C(13) | 8265(4) | 4854(3)  | 3269(3) | 65(1) |
| C(14) | 7814(4) | 4820(3)  | 2102(3) | 60(1) |
| C(15) | 6291(3) | 4751(3)  | 1625(2) | 46(1) |
| C(16) | 3862(3) | 7197(2)  | 3324(2) | 33(1) |
| C(17) | 2497(3) | 7217(3)  | 3664(2) | 39(1) |
| C(18) | 2663(3) | 7878(3)  | 4855(2) | 41(1) |
| C(19) | 4167(3) | 8509(3)  | 5718(2) | 38(1) |
| C(20) | 5532(3) | 8499(3)  | 5348(2) | 41(1) |
| C(21) | 5399(3) | 7862(3)  | 4162(2) | 39(1) |
| C(22) | 4308(4) | 9142(3)  | 7020(2) | 53(1) |
| N(1)  | 2351(2) | 3906(2)  | 2327(2) | 37(1) |
| N(2)  | 3627(2) | 4622(2)  | 1822(2) | 35(1) |
| N(3)  | 367(3)  | 306(2)   | 2363(2) | 45(1) |
| O(1)  | 2015(2) | 5881(2)  | 1111(2) | 53(1) |

## Supporting Information

---

|      |         |         |         |       |
|------|---------|---------|---------|-------|
| O(2) | 5049(2) | 7011(2) | 1471(2) | 51(1) |
| O(3) | 72(3)   | 2284(2) | 3441(2) | 64(1) |
| S(1) | 3620(1) | 6258(1) | 1825(1) | 38(1) |

---

Table 3. Bond lengths [ $\text{\AA}$ ] and angles [ $^\circ$ ] for **5a**.

---

|             |          |
|-------------|----------|
| C(1)-C(2)   | 1.383(4) |
| C(1)-C(6)   | 1.404(3) |
| C(1)-N(3)   | 1.406(3) |
| C(2)-C(3)   | 1.383(4) |
| C(2)-H(2)   | 0.9300   |
| C(3)-C(4)   | 1.378(5) |
| C(3)-H(3)   | 0.9300   |
| C(4)-C(5)   | 1.391(4) |
| C(4)-H(4)   | 0.9300   |
| C(5)-C(6)   | 1.388(3) |
| C(5)-H(5)   | 0.9300   |
| C(6)-C(7)   | 1.464(3) |
| C(7)-N(1)   | 1.277(3) |
| C(7)-C(8)   | 1.523(3) |
| C(8)-O(3)   | 1.208(3) |
| C(8)-N(3)   | 1.368(3) |
| C(9)-N(3)   | 1.453(3) |
| C(9)-H(9A)  | 0.9600   |
| C(9)-H(9B)  | 0.9600   |
| C(9)-H(9C)  | 0.9600   |
| C(10)-C(15) | 1.383(3) |
| C(10)-C(11) | 1.386(3) |
| C(10)-N(2)  | 1.454(3) |
| C(11)-C(12) | 1.381(4) |
| C(11)-H(11) | 0.9300   |
| C(12)-C(13) | 1.384(4) |
| C(12)-H(12) | 0.9300   |
| C(13)-C(14) | 1.372(5) |
| C(13)-H(13) | 0.9300   |
| C(14)-C(15) | 1.386(4) |

## Supporting Information

---

|              |            |
|--------------|------------|
| C(14)-H(14)  | 0.9300     |
| C(15)-H(15)  | 0.9300     |
| C(16)-C(17)  | 1.381(3)   |
| C(16)-C(21)  | 1.388(3)   |
| C(16)-S(1)   | 1.758(2)   |
| C(17)-C(18)  | 1.381(3)   |
| C(17)-H(17)  | 0.9300     |
| C(18)-C(19)  | 1.383(3)   |
| C(18)-H(18)  | 0.9300     |
| C(19)-C(20)  | 1.393(3)   |
| C(19)-C(22)  | 1.501(3)   |
| C(20)-C(21)  | 1.379(3)   |
| C(20)-H(20)  | 0.9300     |
| C(21)-H(21)  | 0.9300     |
| C(22)-H(22A) | 0.9600     |
| C(22)-H(22B) | 0.9600     |
| C(22)-H(22C) | 0.9600     |
| N(1)-N(2)    | 1.428(3)   |
| N(2)-S(1)    | 1.705(2)   |
| O(1)-S(1)    | 1.4260(19) |
| O(2)-S(1)    | 1.4272(18) |

|                |          |
|----------------|----------|
| C(2)-C(1)-C(6) | 121.5(3) |
| C(2)-C(1)-N(3) | 128.0(3) |
| C(6)-C(1)-N(3) | 110.4(2) |
| C(1)-C(2)-C(3) | 117.4(3) |
| C(1)-C(2)-H(2) | 121.3    |
| C(3)-C(2)-H(2) | 121.3    |
| C(4)-C(3)-C(2) | 121.9(3) |
| C(4)-C(3)-H(3) | 119.1    |
| C(2)-C(3)-H(3) | 119.1    |
| C(3)-C(4)-C(5) | 120.9(3) |
| C(3)-C(4)-H(4) | 119.6    |
| C(5)-C(4)-H(4) | 119.6    |
| C(6)-C(5)-C(4) | 118.3(3) |
| C(6)-C(5)-H(5) | 120.9    |



## Supporting Information

---

|                   |            |
|-------------------|------------|
| C(4)-C(5)-H(5)    | 120.9      |
| C(5)-C(6)-C(1)    | 120.0(2)   |
| C(5)-C(6)-C(7)    | 133.5(2)   |
| C(1)-C(6)-C(7)    | 106.3(2)   |
| N(1)-C(7)-C(6)    | 136.4(2)   |
| N(1)-C(7)-C(8)    | 117.3(2)   |
| C(6)-C(7)-C(8)    | 106.2(2)   |
| O(3)-C(8)-N(3)    | 126.3(2)   |
| O(3)-C(8)-C(7)    | 127.8(2)   |
| N(3)-C(8)-C(7)    | 105.8(2)   |
| N(3)-C(9)-H(9A)   | 109.5      |
| N(3)-C(9)-H(9B)   | 109.5      |
| H(9A)-C(9)-H(9B)  | 109.5      |
| N(3)-C(9)-H(9C)   | 109.5      |
| H(9A)-C(9)-H(9C)  | 109.5      |
| H(9B)-C(9)-H(9C)  | 109.5      |
| C(15)-C(10)-C(11) | 120.6(2)   |
| C(15)-C(10)-N(2)  | 118.8(2)   |
| C(11)-C(10)-N(2)  | 120.6(2)   |
| C(12)-C(11)-C(10) | 119.6(3)   |
| C(12)-C(11)-H(11) | 120.2      |
| C(10)-C(11)-H(11) | 120.2      |
| C(11)-C(12)-C(13) | 119.8(3)   |
| C(11)-C(12)-H(12) | 120.1      |
| C(13)-C(12)-H(12) | 120.1      |
| C(14)-C(13)-C(12) | 120.4(3)   |
| C(14)-C(13)-H(13) | 119.8      |
| C(12)-C(13)-H(13) | 119.8      |
| C(13)-C(14)-C(15) | 120.2(3)   |
| C(13)-C(14)-H(14) | 119.9      |
| C(15)-C(14)-H(14) | 119.9      |
| C(10)-C(15)-C(14) | 119.3(3)   |
| C(10)-C(15)-H(15) | 120.4      |
| C(14)-C(15)-H(15) | 120.4      |
| C(17)-C(16)-C(21) | 120.6(2)   |
| C(17)-C(16)-S(1)  | 119.22(18) |

## Supporting Information

---

|                     |            |
|---------------------|------------|
| C(21)-C(16)-S(1)    | 120.17(18) |
| C(16)-C(17)-C(18)   | 119.4(2)   |
| C(16)-C(17)-H(17)   | 120.3      |
| C(18)-C(17)-H(17)   | 120.3      |
| C(17)-C(18)-C(19)   | 121.4(2)   |
| C(17)-C(18)-H(18)   | 119.3      |
| C(19)-C(18)-H(18)   | 119.3      |
| C(18)-C(19)-C(20)   | 118.1(2)   |
| C(18)-C(19)-C(22)   | 120.7(2)   |
| C(20)-C(19)-C(22)   | 121.1(2)   |
| C(21)-C(20)-C(19)   | 121.5(2)   |
| C(21)-C(20)-H(20)   | 119.3      |
| C(19)-C(20)-H(20)   | 119.3      |
| C(20)-C(21)-C(16)   | 119.0(2)   |
| C(20)-C(21)-H(21)   | 120.5      |
| C(16)-C(21)-H(21)   | 120.5      |
| C(19)-C(22)-H(22A)  | 109.5      |
| C(19)-C(22)-H(22B)  | 109.5      |
| H(22A)-C(22)-H(22B) | 109.5      |
| C(19)-C(22)-H(22C)  | 109.5      |
| H(22A)-C(22)-H(22C) | 109.5      |
| H(22B)-C(22)-H(22C) | 109.5      |
| C(7)-N(1)-N(2)      | 115.73(18) |
| N(1)-N(2)-C(10)     | 115.12(18) |
| N(1)-N(2)-S(1)      | 107.26(14) |
| C(10)-N(2)-S(1)     | 115.54(15) |
| C(8)-N(3)-C(1)      | 111.1(2)   |
| C(8)-N(3)-C(9)      | 123.3(2)   |
| C(1)-N(3)-C(9)      | 125.6(2)   |
| O(1)-S(1)-O(2)      | 120.47(12) |
| O(1)-S(1)-N(2)      | 105.31(11) |
| O(2)-S(1)-N(2)      | 104.90(10) |
| O(1)-S(1)-C(16)     | 109.31(11) |
| O(2)-S(1)-C(16)     | 109.77(11) |
| N(2)-S(1)-C(16)     | 106.00(10) |

## Supporting Information

Symmetry transformations used to generate equivalent atoms:

Table 4. Anisotropic displacement parameters ( $\text{\AA}^2 \times 10^3$ ) for **5a**. The anisotropic Displacement factor exponent takes the form:  $-2\pi^2 [h^2 a^{*2} U_{11} + \dots + 2 h k a^* b^* U_{12}]$

|       | U11   | U22   | U33    | U23   | U13   | U12   |
|-------|-------|-------|--------|-------|-------|-------|
| C(1)  | 31(1) | 37(1) | 47(1)  | 10(1) | 1(1)  | 13(1) |
| C(2)  | 54(2) | 34(2) | 70(2)  | 9(1)  | 0(2)  | 19(1) |
| C(3)  | 82(2) | 51(2) | 56(2)  | -3(2) | 6(2)  | 40(2) |
| C(4)  | 63(2) | 67(2) | 43(2)  | 3(1)  | 12(1) | 40(2) |
| C(5)  | 44(2) | 45(2) | 35(1)  | 6(1)  | 7(1)  | 20(1) |
| C(6)  | 32(1) | 34(1) | 34(1)  | 7(1)  | 5(1)  | 14(1) |
| C(7)  | 31(1) | 34(1) | 34(1)  | 9(1)  | 9(1)  | 13(1) |
| C(8)  | 31(1) | 43(2) | 46(1)  | 12(1) | 10(1) | 11(1) |
| C(9)  | 57(2) | 58(2) | 101(3) | 46(2) | 30(2) | 14(2) |
| C(10) | 36(1) | 29(1) | 37(1)  | 8(1)  | 10(1) | 12(1) |
| C(11) | 48(2) | 40(1) | 40(1)  | 15(1) | 11(1) | 16(1) |
| C(12) | 51(2) | 47(2) | 63(2)  | 25(1) | -1(2) | 13(1) |
| C(13) | 35(2) | 49(2) | 100(3) | 27(2) | 3(2)  | 13(1) |
| C(14) | 40(2) | 49(2) | 81(2)  | 14(2) | 22(2) | 14(1) |
| C(15) | 39(2) | 45(2) | 45(1)  | 7(1)  | 15(1) | 14(1) |
| C(16) | 39(1) | 29(1) | 33(1)  | 13(1) | 11(1) | 14(1) |
| C(17) | 33(1) | 40(1) | 41(1)  | 14(1) | 9(1)  | 15(1) |
| C(18) | 41(2) | 44(1) | 46(1)  | 16(1) | 20(1) | 21(1) |
| C(19) | 47(2) | 32(1) | 37(1)  | 12(1) | 14(1) | 18(1) |
| C(20) | 38(1) | 37(1) | 40(1)  | 10(1) | 5(1)  | 14(1) |
| C(21) | 37(1) | 36(1) | 43(1)  | 12(1) | 15(1) | 15(1) |
| C(22) | 67(2) | 49(2) | 41(1)  | 10(1) | 19(1) | 26(2) |
| N(1)  | 36(1) | 34(1) | 39(1)  | 9(1)  | 16(1) | 13(1) |
| N(2)  | 36(1) | 33(1) | 34(1)  | 11(1) | 13(1) | 13(1) |
| N(3)  | 37(1) | 40(1) | 58(1)  | 21(1) | 15(1) | 12(1) |
| O(1)  | 59(1) | 60(1) | 40(1)  | 13(1) | 2(1)  | 32(1) |
| O(2)  | 65(1) | 48(1) | 48(1)  | 26(1) | 33(1) | 22(1) |
| O(3)  | 59(1) | 63(1) | 72(1)  | 18(1) | 42(1) | 22(1) |
| S(1)  | 48(1) | 39(1) | 31(1)  | 14(1) | 13(1) | 19(1) |

## Supporting Information

---

Table 5. Hydrogen coordinates ( $\times 10^4$ ) and isotropic displacement parameters ( $\text{\AA}^2 \times 10^3$ ) for **5a**.

---

|        | x     | y     | z    | U(eq) |
|--------|-------|-------|------|-------|
| H(2)   | 528   | -2137 | 1011 | 68    |
| H(3)   | 2029  | -2114 | -382 | 78    |
| H(4)   | 3521  | 15    | -742 | 69    |
| H(5)   | 3612  | 2237  | 313  | 52    |
| H(9A)  | -1085 | -354  | 3396 | 107   |
| H(9B)  | -123  | -1291 | 3103 | 107   |
| H(9C)  | -1649 | -1522 | 2122 | 107   |
| H(11)  | 4958  | 4708  | 3985 | 52    |
| H(12)  | 7548  | 4914  | 4789 | 69    |
| H(13)  | 9280  | 4880  | 3578 | 78    |
| H(14)  | 8534  | 4842  | 1629 | 72    |
| H(15)  | 5989  | 4738  | 837  | 55    |
| H(17)  | 1474  | 6788  | 3097 | 46    |
| H(18)  | 1745  | 7899  | 5082 | 50    |
| H(20)  | 6556  | 8933  | 5914 | 49    |
| H(21)  | 6324  | 7877  | 3927 | 46    |
| H(22A) | 3520  | 9532  | 7084 | 79    |
| H(22B) | 5401  | 9915  | 7419 | 79    |
| H(22C) | 4091  | 8383  | 7388 | 79    |

---

Table 6. Torsion angles [°] for **5a**.

---

|                         |            |
|-------------------------|------------|
| C(6)-C(1)-C(2)-C(3)     | -0.9(4)    |
| N(3)-C(1)-C(2)-C(3)     | 178.0(3)   |
| C(1)-C(2)-C(3)-C(4)     | -0.6(4)    |
| C(2)-C(3)-C(4)-C(5)     | 0.8(5)     |
| C(3)-C(4)-C(5)-C(6)     | 0.5(4)     |
| C(4)-C(5)-C(6)-C(1)     | -1.9(4)    |
| C(4)-C(5)-C(6)-C(7)     | -175.8(3)  |
| C(2)-C(1)-C(6)-C(5)     | 2.2(4)     |
| N(3)-C(1)-C(6)-C(5)     | -176.9(2)  |
| C(2)-C(1)-C(6)-C(7)     | 177.6(2)   |
| N(3)-C(1)-C(6)-C(7)     | -1.6(3)    |
| C(5)-C(6)-C(7)-N(1)     | -6.7(5)    |
| C(1)-C(6)-C(7)-N(1)     | 178.8(3)   |
| C(5)-C(6)-C(7)-C(8)     | 173.9(3)   |
| C(1)-C(6)-C(7)-C(8)     | -0.6(3)    |
| N(1)-C(7)-C(8)-O(3)     | 0.3(4)     |
| C(6)-C(7)-C(8)-O(3)     | 179.9(3)   |
| N(1)-C(7)-C(8)-N(3)     | -177.0(2)  |
| C(6)-C(7)-C(8)-N(3)     | 2.5(3)     |
| C(15)-C(10)-C(11)-C(12) | 0.4(4)     |
| N(2)-C(10)-C(11)-C(12)  | -178.9(2)  |
| C(10)-C(11)-C(12)-C(13) | -2.3(4)    |
| C(11)-C(12)-C(13)-C(14) | 2.7(4)     |
| C(12)-C(13)-C(14)-C(15) | -1.2(4)    |
| C(11)-C(10)-C(15)-C(14) | 1.0(4)     |
| N(2)-C(10)-C(15)-C(14)  | -179.6(2)  |
| C(13)-C(14)-C(15)-C(10) | -0.6(4)    |
| C(21)-C(16)-C(17)-C(18) | -1.4(4)    |
| S(1)-C(16)-C(17)-C(18)  | 176.21(19) |
| C(16)-C(17)-C(18)-C(19) | -0.7(4)    |
| C(17)-C(18)-C(19)-C(20) | 1.8(4)     |
| C(17)-C(18)-C(19)-C(22) | -176.2(2)  |
| C(18)-C(19)-C(20)-C(21) | -1.0(4)    |
| C(22)-C(19)-C(20)-C(21) | 177.1(2)   |

## Supporting Information

---

|                         |             |
|-------------------------|-------------|
| C(19)-C(20)-C(21)-C(16) | -1.0(4)     |
| C(17)-C(16)-C(21)-C(20) | 2.1(4)      |
| S(1)-C(16)-C(21)-C(20)  | -175.39(19) |
| C(6)-C(7)-N(1)-N(2)     | -6.3(4)     |
| C(8)-C(7)-N(1)-N(2)     | 172.97(19)  |
| C(7)-N(1)-N(2)-C(10)    | -69.5(2)    |
| C(7)-N(1)-N(2)-S(1)     | 160.37(17)  |
| C(15)-C(10)-N(2)-N(1)   | 151.8(2)    |
| C(11)-C(10)-N(2)-N(1)   | -28.8(3)    |
| C(15)-C(10)-N(2)-S(1)   | -82.2(2)    |
| C(11)-C(10)-N(2)-S(1)   | 97.1(2)     |
| O(3)-C(8)-N(3)-C(1)     | 179.1(3)    |
| C(7)-C(8)-N(3)-C(1)     | -3.5(3)     |
| O(3)-C(8)-N(3)-C(9)     | 1.9(4)      |
| C(7)-C(8)-N(3)-C(9)     | 179.4(2)    |
| C(2)-C(1)-N(3)-C(8)     | -175.7(3)   |
| C(6)-C(1)-N(3)-C(8)     | 3.4(3)      |
| C(2)-C(1)-N(3)-C(9)     | 1.4(4)      |
| C(6)-C(1)-N(3)-C(9)     | -179.6(3)   |
| N(1)-N(2)-S(1)-O(1)     | -59.66(16)  |
| C(10)-N(2)-S(1)-O(1)    | 170.47(16)  |
| N(1)-N(2)-S(1)-O(2)     | 172.26(14)  |
| C(10)-N(2)-S(1)-O(2)    | 42.39(18)   |
| N(1)-N(2)-S(1)-C(16)    | 56.13(16)   |
| C(10)-N(2)-S(1)-C(16)   | -73.74(17)  |
| C(17)-C(16)-S(1)-O(1)   | 11.5(2)     |
| C(21)-C(16)-S(1)-O(1)   | -170.91(19) |
| C(17)-C(16)-S(1)-O(2)   | 145.69(19)  |
| C(21)-C(16)-S(1)-O(2)   | -36.7(2)    |
| C(17)-C(16)-S(1)-N(2)   | -101.5(2)   |
| C(21)-C(16)-S(1)-N(2)   | 76.0(2)     |

---

Symmetry transformations used to generate equivalent atoms:
